# Supplementary material for: Immunopeptidomics of colorectal cancer organoids reveals a sparse HLA class I neoantigen landscape and no increase in neoantigens with interferon or MEK-inhibitor treatment
Source: J Immunother Cancer. 2019 Nov 18;7:309. doi: 10.1186/s40425-019-0769-8 (PMC6859637; doi:10.1186/s40425-019-0769-8)
Supplement: Supplementary file 1 — Additional file 1. Supplementary information [file 40425_2019_769_MOESM1_ESM.zip]

Archive with 3 entries (3 files):
- Supplementary Information.pdf
- Supplementary Table 1.xlsx
- Supplementary Table 4.xlsx
