# Supplementary material for: Immunopeptidomics of colorectal cancer organoids reveals a sparse HLA class I neoantigen landscape and no increase in neoantigens with interferon or MEK-inhibitor treatment
Source: J Immunother Cancer. 2019 Nov 18;7:309. doi: 10.1186/s40425-019-0769-8 (PMC6859637; doi:10.1186/s40425-019-0769-8)
Supplement: Supplementary file 1 — Additional file 1. Supplementary information [file 40425_2019_769_MOESM1_ESM.zip › Supplementary Table 4.xlsx]

## Sheet: Sheet1
	hgnc_symbol	CRC01_UT	CRC04_UT	CRC05_UT	CRC08_UT	CRC01_IFNg	CRC04_IFNg	CRC05_IFNg	CRC08_IFNg
ENSG00000000003	TSPAN6	372.949	160.491	429.689	305.187	244.994	156.646	395.541	84.6411
ENSG00000000005	TNMD	0	10.3543	6.35008	0	10.8886	0	0.778623	0
ENSG00000000419	DPM1	109.182	194.142	178.508	124.812	134.293	174.576	253.831	181.669
ENSG00000000457	SCYL3	75.6709	50.477	56.4451	32.2097	63.517	26.4223	64.6257	82.5767
ENSG00000000460	C1orf112	29.1873	31.0628	21.1669	20.131	11.796	24.535	6.22899	20.6442
ENSG00000000938	FGR	0	0	0	0	0	0	0	0
ENSG00000000971	CFH	0	0	0	0	93.4607	90.5907	42.0457	28.9018
ENSG00000001036	FUCA2	170.8	178.611	268.82	214.194	149.719	264.223	219.572	210.571
ENSG00000001084	GCLC	92.9671	214.851	107.951	146.554	262.234	168.914	143.267	187.862
ENSG00000001167	NFYA	44.3215	36.2399	46.5672	57.9774	36.2954	59.4501	27.2518	35.0951
ENSG00000001460	STPG1	21.6203	22.0028	29.6337	7.24718	22.6846	16.0421	20.2442	30.9663
ENSG00000001461	NIPAL3	210.797	176.022	273.759	113.539	187.829	131.168	144.824	157.928
ENSG00000001497	LAS1L	124.316	174.728	91.0178	126.423	58.98	92.478	87.9844	120.768
ENSG00000001561	ENPP4	19.4582	59.5369	18.3447	47.5093	8.16647	55.6755	24.1373	16.5153
ENSG00000001617	SEMA3F	52.9696	2.58856	21.1669	17.7153	307.604	118.9	85.6486	61.9325
ENSG00000001626	CFTR	201.068	141.077	121.357	67.6403	11.796	11.3238	35.8167	47.4816
ENSG00000001629	ANKIB1	271.334	309.333	419.811	253.651	494.525	240.631	562.945	305.534
ENSG00000001630	CYP51A1	9.72911	7.76569	9.17234	13.6891	3.62954	7.54922	14.7938	7.22546
ENSG00000001631	KRIT1	151.342	275.682	194.03	136.086	207.791	135.886	233.587	186.83
ENSG00000002016	RAD52	19.4582	152.725	25.4003	4.02621	28.1289	6.60557	31.1449	97.0276
ENSG00000002330	BAD	17.2962	36.2399	67.7342	40.2621	29.9437	50.9573	70.0761	44.385
ENSG00000002549	LAP3	125.397	77.6569	167.924	110.318	965.458	1524.94	1283.95	1269.62
ENSG00000002586	CD99	875.62	103.543	330.204	74.0823	629.725	82.0978	173.633	90.8344
ENSG00000002587	HS3ST1	51.8886	22.0028	44.4505	41.0673	20.8699	16.0421	58.3967	16.5153
ENSG00000002726	AOC1	363.22	133.311	110.068	110.318	210.513	50.9573	54.5036	112.511
ENSG00000002745	WNT16	0	1.29428	0	0	0	0.943653	0	6.19325
ENSG00000002746	HECW1	0	0	0	0	0	1.88731	0	0
ENSG00000002822	MAD1L1	19.4582	25.8856	21.1669	38.6516	54.4431	51.9009	7.78623	34.0629
ENSG00000002834	LASP1	872.377	564.307	860.788	781.085	1156.92	723.782	1087.74	1072.47
ENSG00000002919	SNX11	46.4835	31.0628	79.7288	50.7302	49.9062	80.2105	99.6638	31.9985
ENSG00000002933	TMEM176A	295.116	403.816	118.535	152.191	214.143	96.2526	136.259	441.785
ENSG00000003056	M6PR	296.197	330.042	302.687	99.85	208.699	102.858	211.786	336.5
ENSG00000003096	KLHL13	0	58.2427	7.05564	2.41573	0	0	2.33587	3.09663
ENSG00000003137	CYP26B1	0	0	0	0	0	0	0	0
ENSG00000003147	ICA1	344.843	521.595	254.709	241.573	424.656	323.673	341.816	551.2
ENSG00000003249	DBNDD1	65.9418	80.2454	28.9281	90.1871	106.164	80.2105	35.038	37.1595
ENSG00000003393	ALS2	34.5924	55.6541	48.6839	66.8351	39.0176	86.8161	41.267	45.4172
ENSG00000003400	CASP10	16.2152	27.1799	23.2836	41.8726	104.349	162.308	157.282	280.761
ENSG00000003402	CFLAR	419.433	464.647	903.122	799.605	1156.01	1269.21	1501.96	664.743
ENSG00000003436	TFPI	102.696	41.417	9.17234	161.854	99.8124	116.069	14.7938	19.612
ENSG00000003509	NDUFAF7	82.157	53.0655	21.1669	59.5879	40.8323	44.3517	29.5877	21.6764
ENSG00000003756	RBM5	235.661	412.876	185.563	98.2395	223.217	120.788	345.709	361.273
ENSG00000003987	MTMR7	0	0	0	0	0	0	0	0
ENSG00000003989	SLC7A2	9.72911	1.29428	0.705564	0	1.81477	0	0	0
ENSG00000004059	ARF5	8.6481	0	0	4.83145	0.907385	0.943653	0	7.22546
ENSG00000004139	SARM1	5.40506	27.1799	19.0502	8.05242	7.25908	0	7.00761	14.4509
ENSG00000004142	POLDIP2	150.261	49.1827	215.903	90.9923	102.535	83.0415	188.427	115.607
ENSG00000004399	PLXND1	10.8101	31.0628	0	24.9625	0.907385	41.5207	1.55725	11.3543
ENSG00000004455	AK2	350.248	210.968	185.563	201.31	499.062	355.757	182.198	370.563
ENSG00000004468	CD38	1.08101	6.47141	0	0	1.81477	3.77461	7.78623	7.22546
ENSG00000004478	FKBP4	532.939	680.792	119.24	387.321	511.765	392.56	182.976	823.703
ENSG00000004487	KDM1A	76.7519	113.897	59.973	115.15	56.2579	56.6192	66.183	90.8344
ENSG00000004534	RBM6	265.929	410.287	437.45	106.292	225.939	172.688	337.144	305.534
ENSG00000004660	CAMKK1	5.40506	2.58856	4.93895	23.352	6.3517	9.43653	1.55725	0
ENSG00000004700	RECQL	91.8861	236.853	118.535	120.786	75.313	105.689	207.892	143.477
ENSG00000004766	VPS50	21.6203	54.3598	54.3284	22.5468	46.2767	14.1548	96.5493	55.7393
ENSG00000004776	HSPB6	0	0	7.76121	1.61048	0	0	7.78623	1.03221
ENSG00000004777	ARHGAP33	2.16203	7.76569	4.93895	11.2734	0	11.3238	2.33587	3.09663
ENSG00000004779	NDUFAB1	422.676	388.284	450.15	530.654	436.452	552.037	340.258	345.79
ENSG00000004799	PDK4	15.1342	23.2971	16.9335	103.876	44.4619	17.9294	25.6946	141.413
ENSG00000004809	SLC22A16	0	0	0	0	0	0	0	0
ENSG00000004838	ZMYND10	0	5.17713	0	0	0	0	0	0
ENSG00000004846	ABCB5	4.32405	0	0	0	0	0	0	0
ENSG00000004848	ARX	0	31.0628	1.41113	0	0	0	11.6793	13.4187
ENSG00000004864	SLC25A13	216.203	130.722	227.897	107.097	221.402	84.9288	174.412	110.446
ENSG00000004866	ST7	43.2405	37.5342	23.2836	44.2883	53.5357	43.408	39.7098	35.0951
ENSG00000004897	CDC27	192.42	295.096	147.463	231.91	194.18	267.997	188.427	305.534
ENSG00000004939	SLC4A1	0	0	0	0	0	0	0	0
ENSG00000004948	CALCR	0	6.47141	2.82226	0	0	0	0	0
ENSG00000004961	HCCS	102.696	33.6513	161.574	100.655	97.9976	105.689	175.19	52.6427
ENSG00000004975	DVL2	49.7266	20.7085	35.2782	40.2621	29.0363	16.9858	40.4884	21.6764
ENSG00000005001	PRSS22	267.01	138.488	191.208	360.748	244.994	490.7	371.403	396.368
ENSG00000005007	UPF1	505.914	497.004	409.227	320.486	475.47	303.856	492.868	990.921
ENSG00000005020	SKAP2	255.119	464.647	257.531	435.636	255.883	459.559	397.876	317.92
ENSG00000005022	SLC25A5	1076.69	607.018	612.43	1528.35	394.713	586.008	512.334	591.456
ENSG00000005059	MCUB	3.24304	38.8284	14.8168	58.7827	377.472	273.659	161.175	89.8022
ENSG00000005073	HOXA11	275.658	90.5997	7.05564	89.3818	119.775	78.3232	6.22899	38.1917
ENSG00000005075	POLR2J	374.03	248.502	361.249	245.599	441.897	392.56	402.548	415.98
ENSG00000005100	DHX33	163.233	287.33	101.601	135.281	113.423	108.52	63.8471	171.347
ENSG00000005102	MEOX1	0	0	0	0	0	0	0	0
ENSG00000005108	THSD7A	17.2962	31.0628	11.9946	1.61048	0	1.88731	18.687	24.773
ENSG00000005156	LIG3	139.451	229.088	263.881	82.1347	90.7385	101.915	135.48	210.571
ENSG00000005175	RPAP3	314.575	278.27	289.987	217.415	506.321	260.448	437.586	305.534
ENSG00000005187	ACSM3	34.5924	27.1799	9.17234	70.056	54.4431	81.1542	4.67174	33.0307
ENSG00000005189	REXO5	3.24304	15.5314	4.93895	15.2996	7.25908	7.54922	18.687	8.25767
ENSG00000005194	CIAPIN1	153.504	107.425	178.508	72.4718	205.976	86.8161	203.999	158.96
ENSG00000005206	SPPL2B	230.256	77.6569	179.213	76.498	208.699	71.7176	178.305	168.25
ENSG00000005238	FAM214B	36.7544	25.8856	23.9892	47.5093	58.0727	38.6898	28.0304	18.5798
ENSG00000005243	COPZ2	1.08101	5.17713	7.76121	2.41573	9.07385	3.77461	8.56486	1.03221
ENSG00000005249	PRKAR2B	4.32405	2.58856	1.41113	0	12.7034	0	7.00761	38.1917
ENSG00000005302	MSL3	78.9139	172.139	157.341	113.539	109.794	115.126	150.274	172.379
ENSG00000005339	CREBBP	281.063	234.265	306.92	190.842	503.599	446.348	435.25	463.462
ENSG00000005379	TSPOAP1	7.56709	0	27.517	24.1573	1.81477	11.3238	0	0
ENSG00000005381	MPO	1.08101	0	0	0	8.16647	0	4.67174	0
ENSG00000005421	PON1	0	0	0	0	0	0	0	0
ENSG00000005436	GCFC2	27.0253	29.7685	33.1615	69.2508	9.98124	47.1826	42.0457	48.5138
ENSG00000005448	WDR54	5.40506	75.0683	15.5224	37.8464	10.8886	22.6477	14.7938	23.7408
ENSG00000005469	CROT	34.5924	29.7685	15.5224	28.9887	18.1477	10.3802	14.7938	15.4831
ENSG00000005471	ABCB4	0	14.2371	9.8779	0	0	0	73.1906	1.03221
ENSG00000005483	KMT2E	697.253	1008.25	817.749	590.242	682.354	623.755	974.836	996.082
ENSG00000005486	RHBDD2	148.099	181.199	153.107	202.921	123.404	150.984	86.4272	152.767
ENSG00000005513	SOX8	49.7266	0	16.9335	0	41.7397	0	10.1221	0
ENSG00000005700	IBTK	303.765	759.743	431.805	372.022	587.078	653.008	767.722	998.146
ENSG00000005801	ZNF195	159.99	113.897	195.441	77.3032	146.996	62.2811	209.45	89.8022
ENSG00000005810	MYCBP2	486.456	653.612	207.436	359.138	970.902	627.529	464.838	1247.94
ENSG00000005812	FBXL3	81.0759	151.431	43.745	73.277	72.5908	58.5065	29.5877	110.446
ENSG00000005844	ITGAL	0	0	0	0	0	0	0	0
ENSG00000005882	PDK2	21.6203	59.5369	37.3949	29.7939	20.8699	16.0421	14.0152	52.6427
ENSG00000005884	ITGA3	287.549	88.0111	241.303	256.067	440.989	703.021	506.105	157.928
ENSG00000005889	ZFX	100.534	135.9	155.93	132.865	51.721	91.5343	140.152	99.0921
ENSG00000005893	LAMP2	291.873	323.57	498.128	458.988	346.621	386.898	715.555	322.049
ENSG00000005961	ITGA2B	0	0	1.41113	0	0	0	0	0
ENSG00000005981	ASB4	35.6734	1.29428	2.11669	16.9101	2.72216	3.77461	2.33587	0
ENSG00000006007	GDE1	676.714	327.453	559.512	549.98	837.517	436.911	425.907	423.206
ENSG00000006015	REX1BD	119.992	122.957	198.264	133.67	127.034	91.5343	169.74	215.732
ENSG00000006016	CRLF1	0	0	0.705564	0.805242	0	0	0	0
ENSG00000006025		54.0506	37.5342	28.2226	16.1048	38.1102	14.1548	29.5877	10.3221
ENSG00000006042	TMEM98	16.2152	216.145	50.0951	53.146	1.81477	9.43653	29.5877	97.0276
ENSG00000006047	YBX2	10.8101	27.1799	8.46677	22.5468	9.98124	14.1548	2.33587	9.28988
ENSG00000006059	KRT33A	0	0	0	0	0	0	0	0
ENSG00000006062	MAP3K14	16.2152	55.6541	6.35008	9.6629	12.7034	16.0421	7.78623	18.5798
ENSG00000006071	ABCC8	0	0	0	0	0	4.71826	0	0
ENSG00000006116	CACNG3	0	0	0	0	0	0	0	0
ENSG00000006118	TMEM132A	60.5367	5.17713	43.0394	32.2097	29.0363	53.7882	26.4732	13.4187
ENSG00000006125	AP2B1	428.081	471.118	572.918	471.872	527.191	358.588	520.899	609.003
ENSG00000006128	TAC1	0	0	0	4.83145	0	0	0	0
ENSG00000006194	ZNF263	45.4025	36.2399	93.84	56.3669	51.721	79.2668	100.442	51.6104
ENSG00000006210	CX3CL1	6.48608	9.05997	17.6391	10.4681	91.6459	64.1684	599.54	220.893
ENSG00000006282	SPATA20	99.4532	31.0628	50.8006	92.6028	89.8311	89.647	27.2518	39.2239
ENSG00000006283	CACNA1G	0	0	0	0	0	0	0	5.16104
ENSG00000006327	TNFRSF12A	177.286	20.7085	77.6121	143.333	325.751	251.955	79.4196	102.189
ENSG00000006377	DLX6	1.08101	5.17713	19.0502	0	0	0	7.78623	3.09663
ENSG00000006432	MAP3K9	69.1848	37.5342	43.745	27.3782	58.98	36.8025	63.8471	48.5138
ENSG00000006451	RALA	404.299	401.227	373.243	317.265	673.28	634.135	757.6	768.996
ENSG00000006453	BAIAP2L1	354.572	151.431	173.569	372.022	646.058	468.052	337.922	339.597
ENSG00000006459	KDM7A	209.716	139.782	194.03	92.6028	381.102	157.59	301.327	205.41
ENSG00000006468	ETV1	2.16203	25.8856	1.41113	9.6629	0	25.4786	2.33587	2.06442
ENSG00000006530	AGK	28.1063	12.9428	16.9335	26.573	18.1477	34.9152	9.34348	13.4187
ENSG00000006534	ALDH3B1	109.182	69.8912	176.391	135.281	335.733	144.379	263.175	131.091
ENSG00000006555	TTC22	17.2962	84.1283	16.9335	29.7939	38.1102	40.5771	7.78623	95.9954
ENSG00000006576	PHTF2	41.0785	50.477	16.228	53.9512	2.72216	70.774	12.458	28.9018
ENSG00000006606	CCL26	1.08101	3.88284	0	15.2996	0	11.3238	0	5.16104
ENSG00000006607	FARP2	92.9671	160.491	93.1345	92.6028	89.8311	95.3089	115.236	142.445
ENSG00000006611	USH1C	499.428	288.625	788.115	221.442	573.468	191.562	693.753	327.21
ENSG00000006625	GGCT	478.889	341.69	219.43	394.569	308.511	499.192	170.518	387.078
ENSG00000006634	DBF4	411.866	433.584	369.01	227.883	185.107	204.773	207.892	165.153
ENSG00000006638	TBXA2R	2.16203	0	2.11669	2.41573	0	1.88731	0	0
ENSG00000006652	IFRD1	204.311	102.248	380.299	95.8238	431.008	125.506	683.631	219.86
ENSG00000006659	LGALS14	0	0	4.93895	0	0	0	0	0
ENSG00000006695	COX10	43.2405	63.4198	86.0788	53.146	59.8874	36.8025	47.496	49.546
ENSG00000006704	GTF2IRD1	165.395	78.9512	94.5456	203.726	226.846	202.885	162.732	171.347
ENSG00000006712	PAF1	128.64	122.957	287.87	108.708	220.495	160.421	404.884	168.25
ENSG00000006715	VPS41	125.397	242.031	310.448	135.281	144.274	95.3089	262.396	151.735
ENSG00000006740	ARHGAP44	0	0	0	3.22097	1.81477	4.71826	0.778623	0
ENSG00000006744	ELAC2	99.4532	110.014	114.301	78.1085	67.1465	85.8724	144.045	76.3835
ENSG00000006747	SCIN	7.56709	55.6541	0.705564	11.2734	1.81477	10.3802	3.89312	44.385
ENSG00000006756	ARSD	185.934	221.322	424.044	57.9774	256.79	93.4216	725.677	120.768
ENSG00000006757	PNPLA4	59.4557	49.1827	130.529	76.498	58.98	63.2247	109.007	50.5782
ENSG00000006788	MYH13	0	0	4.23339	0	0	0	2.33587	0
ENSG00000006831	ADIPOR2	644.283	658.789	288.576	322.902	485.451	254.786	378.411	860.862
ENSG00000006837	CDKL3	5.40506	0	4.93895	1.61048	3.62954	3.77461	0	0
ENSG00000007001	UPP2	0	0	0	2.41573	0	0	0	0
ENSG00000007038	PRSS21	0	0	0	0	0	0	0	0
ENSG00000007047	MARK4	52.9696	24.5913	95.9567	67.6403	111.608	83.0415	79.4196	33.0307
ENSG00000007062	PROM1	20.5392	456.881	57.8563	101.46	0.907385	46.239	19.4656	161.025
ENSG00000007080	CCDC124	41.0785	81.5397	32.456	27.3782	60.7948	83.9851	56.0609	78.4479
ENSG00000007129	CEACAM21	0	0	1.41113	0	1.81477	0	0	0
ENSG00000007168	PAFAH1B1	111.344	229.088	296.337	171.517	176.033	231.195	398.655	281.793
ENSG00000007171	NOS2	6.48608	3.88284	7.76121	3.22097	558.042	83.0415	449.266	924.859
ENSG00000007174	DNAH9	0	0	0	0	0	0	7.78623	0
ENSG00000007202	KIAA0100	99.4532	150.137	169.335	70.8613	91.6459	64.1684	99.6638	146.574
ENSG00000007216	SLC13A2	1.08101	0	0	0	0	0	0	0
ENSG00000007237	GAS7	11.8911	0	0.705564	0	0.907385	0	0	0
ENSG00000007255	TRAPPC6A	69.1848	133.311	123.474	133.67	92.5533	118.9	64.6257	83.6089
ENSG00000007264	MATK	0	0	0	0	0	0	0	0
ENSG00000007306	CEACAM7	0	2.58856	11.289	6.44193	0.907385	2.83096	8.56486	0
ENSG00000007312	CD79B	0	0	0	0	0	0	0	1.03221
ENSG00000007314	SCN4A	0	0	2.11669	0	14.5182	2.83096	2.33587	6.19325
ENSG00000007341	ST7L	22.7013	42.7113	15.5224	32.2097	11.796	29.2532	10.9007	59.8681
ENSG00000007350	TKTL1	0	3.88284	0	0	0	0	0	0
ENSG00000007372	PAX6	5.40506	0	47.2728	16.1048	7.25908	23.5913	27.2518	0
ENSG00000007376	RPUSD1	184.853	62.1255	146.757	51.5355	114.331	30.1969	57.6181	49.546
ENSG00000007384	RHBDF1	224.851	29.7685	198.969	130.449	215.958	179.294	163.511	98.0598
ENSG00000007392	LUC7L	71.3468	166.962	134.763	131.254	72.5908	115.126	132.366	133.155
ENSG00000007402	CACNA2D2	0	16.8257	0	0	0	0	0	11.3543
ENSG00000007516	BAIAP3	3.24304	0	6.35008	52.3407	0.907385	32.0842	3.89312	3.09663
ENSG00000007520	TSR3	158.909	186.377	240.597	165.075	187.829	138.717	184.534	98.0598
ENSG00000007541	PIGQ	25.9443	12.9428	23.9892	6.44193	35.388	12.2675	31.1449	8.25767
ENSG00000007545	CRAMP1	52.9696	64.7141	55.7396	37.8464	43.5545	33.0279	59.1754	58.8359
ENSG00000007866	TEAD3	50.8076	82.834	17.6391	112.734	46.2767	74.5486	16.3511	53.6749
ENSG00000007908	SELE	0	0	0	0	0	0	0	0
ENSG00000007923	DNAJC11	70.2658	95.7768	105.835	92.6028	41.7397	50.0136	109.007	87.7378
ENSG00000007933	FMO3	0	0	0	0	0	0	0	0
ENSG00000007944	MYLIP	127.559	24.5913	88.1955	99.0447	102.535	60.3938	109.007	23.7408
ENSG00000007952	NOX1	19.4582	229.088	580.679	256.872	17.2403	44.3517	199.328	52.6427
ENSG00000007968	E2F2	12.9722	44.0056	17.6391	11.2734	19.0551	50.9573	3.11449	174.443
ENSG00000008018	PSMB1	541.587	1091.08	958.156	872.077	730.445	1061.61	1005.98	1133.37
ENSG00000008056	SYN1	0	0	3.52782	2.41573	0	0	3.11449	4.12884
ENSG00000008083	JARID2	208.635	198.025	207.436	118.371	201.44	339.715	392.426	259.084
ENSG00000008086	CDKL5	55.1316	27.1799	28.2226	21.7415	39.0176	28.3096	87.2058	12.3865
ENSG00000008118	CAMK1G	0	0	0	0	0	3.77461	0	0
ENSG00000008128	CDK11A	3.24304	11.6485	14.8168	21.7415	6.3517	27.3659	28.0304	9.28988
ENSG00000008130	NADK	43.2405	67.3026	86.0788	53.146	52.6283	67.943	112.122	57.8037
ENSG00000008196	TFAP2B	0	0	0	0	0	0	0	0
ENSG00000008197	TFAP2D	0	0	0	0	0	0	0	0
ENSG00000008226	DLEC1	0	2.58856	0	2.41573	0	0	0	0
ENSG00000008256	CYTH3	117.83	28.4742	59.973	33.0149	71.6834	22.6477	56.0609	25.8052
ENSG00000008277	ADAM22	1.08101	7.76569	4.23339	0	0	1.88731	0	3.09663
ENSG00000008282	SYPL1	206.473	164.374	161.574	369.606	226.846	251.955	180.641	156.896
ENSG00000008283	CYB561	294.035	319.687	364.777	369.606	324.844	414.264	460.945	425.27
ENSG00000008294	SPAG9	220.527	511.241	493.189	339.007	441.897	463.334	1340.01	528.491
ENSG00000008300	CELSR3	0	11.6485	47.9784	0	1.81477	1.88731	52.1678	9.28988
ENSG00000008311	AASS	2.16203	9.05997	0	1.61048	2.72216	1.88731	0	8.25767
ENSG00000008323	PLEKHG6	69.1848	119.074	39.5116	48.3145	78.0351	26.4223	33.4808	67.0936
ENSG00000008324	SS18L2	105.939	132.017	148.874	57.1722	119.775	45.2953	75.5265	111.479
ENSG00000008382	MPND	25.9443	14.2371	28.2226	21.7415	7.25908	15.0984	13.2366	2.06442
ENSG00000008394	MGST1	202.149	815.397	62.7952	223.857	97.9976	147.21	17.1297	455.204
ENSG00000008405	CRY1	30.2684	34.9456	23.2836	76.498	58.98	62.2811	24.1373	60.9003
ENSG00000008438	PGLYRP1	0	0	0	1.61048	0	0	0	0
ENSG00000008441	NFIX	216.203	324.865	503.773	237.546	570.745	468.052	794.974	518.169
ENSG00000008513	ST3GAL1	0	5.17713	27.517	0	0	1.88731	77.8623	1.03221
ENSG00000008516	MMP25	1.08101	0	0	0	40.8323	14.1548	35.038	3.09663
ENSG00000008517	IL32	429.162	207.085	700.625	223.052	3699.41	1536.27	3285.79	617.261
ENSG00000008710	PKD1	28.1063	40.1227	32.456	40.2621	78.0351	115.126	116.793	132.123
ENSG00000008735	MAPK8IP2	0	0	14.1113	2.41573	1.81477	0.943653	31.1449	4.12884
ENSG00000008838	MED24	114.587	75.0683	123.474	91.7976	94.3681	103.802	87.9844	74.319
ENSG00000008853	RHOBTB2	180.529	15.5314	46.5672	6.44193	46.2767	5.66192	0.778623	9.28988
ENSG00000008869	HEATR5B	71.3468	67.3026	25.4003	48.3145	42.6471	41.5207	25.6946	37.1595
ENSG00000008952	SEC62	597.8	1070.37	593.38	1199.01	466.396	992.723	531.021	1040.47
ENSG00000008988	RPS20	5489.38	6924.41	2987.36	7656.24	5858.08	6595.19	2616.95	7217.2
ENSG00000009307	CSDE1	2236.61	3494.56	931.345	2826.4	2998.91	2748.86	1341.57	4968.02
ENSG00000009335	UBE3C	414.028	308.039	335.143	218.221	425.564	162.308	343.373	369.531
ENSG00000009413	REV3L	132.965	366.282	176.391	108.708	91.6459	167.97	196.213	283.857
ENSG00000009694	TENM1	2.16203	1.29428	0	2.41573	0.907385	0	0	0
ENSG00000009709	PAX7	0	0	0	0	0	0	0	0
ENSG00000009724	MASP2	0	0	0	0	0	0	0	0
ENSG00000009765	IYD	19.4582	69.8912	96.6623	11.2734	0	1.88731	26.4732	13.4187
ENSG00000009780	FAM76A	46.4835	88.0111	35.2782	33.8202	73.4982	73.6049	45.1601	49.546
ENSG00000009790	TRAF3IP3	0	0	0	0	0	0	0	0
ENSG00000009830	POMT2	73.5089	50.477	64.2063	44.2883	15.4256	35.8588	31.1449	54.7071
ENSG00000009844	VTA1	104.858	201.908	143.23	164.269	116.145	100.027	176.747	232.247
ENSG00000009950	MLXIPL	9.72911	97.0711	26.1059	59.5879	23.592	48.1263	35.8167	77.4157
ENSG00000009954	BAZ1B	777.248	759.743	687.925	583.8	1062.55	604.882	742.807	950.664
ENSG00000010017	RANBP9	38.9165	53.0655	34.5726	67.6403	77.1278	100.971	65.4043	57.8037
ENSG00000010030	ETV7	0	22.0028	4.93895	0	74.4056	88.7034	130.809	198.184
ENSG00000010072	SPRTN	69.1848	47.8884	54.3284	37.0411	22.6846	37.7461	63.8471	56.7715
ENSG00000010165	EEF1AKNMT	110.263	108.72	166.513	74.8875	71.6834	79.2668	150.274	48.5138
ENSG00000010219	DYRK4	63.7797	287.33	66.323	22.5468	192.366	78.3232	58.3967	357.144
ENSG00000010244	ZNF207	295.116	613.489	336.554	329.344	402.879	385.01	352.716	523.33
ENSG00000010256	UQCRC1	318.899	310.628	216.608	200.505	276.753	151.928	268.625	248.762
ENSG00000010270	STARD3NL	56.2127	41.417	33.8671	28.1835	40.8323	49.07	10.9007	27.8696
ENSG00000010278	CD9	1487.47	815.397	237.775	2134.7	489.081	665.275	159.618	1312.97
ENSG00000010282	HHATL	2.16203	0	0	0	0	0	0	0
ENSG00000010292	NCAPD2	403.218	715.738	140.407	281.835	232.291	296.307	99.6638	549.135
ENSG00000010295	IFFO1	5.40506	2.58856	8.46677	0	3.62954	0	8.56486	0
ENSG00000010310	GIPR	10.8101	0	9.17234	8.05242	9.07385	1.88731	14.7938	0
ENSG00000010318	PHF7	9.72911	47.8884	5.64451	40.2621	6.3517	13.2111	7.00761	14.4509
ENSG00000010319	SEMA3G	0	0	0	1.61048	0	0	1.55725	0
ENSG00000010322	NISCH	48.6456	95.7768	68.4397	43.4831	29.0363	47.1826	48.2746	97.0276
ENSG00000010327	STAB1	0	0	0	0	0	0	0	0
ENSG00000010361	FUZ	1.08101	15.5314	13.4057	23.352	0.907385	16.0421	9.34348	12.3865
ENSG00000010379	SLC6A13	1.08101	0	0	0	0	0	0	0
ENSG00000010404	IDS	316.737	225.205	120.651	210.168	264.049	173.632	138.595	199.216
ENSG00000010438	PRSS3	417.271	90.5997	272.348	372.827	428.286	460.503	270.961	377.788
ENSG00000010539	ZNF200	45.4025	53.0655	71.9676	41.8726	54.4431	51.9009	108.229	36.1273
ENSG00000010610	CD4	1.08101	0	0	0	1.81477	0	0	0
ENSG00000010626	LRRC23	23.7823	11.6485	16.9335	7.24718	19.9625	16.0421	10.9007	25.8052
ENSG00000010671	BTK	0	1.29428	0	0	0	0	0	0
ENSG00000010704	HFE	15.1342	45.2998	12.7002	18.5206	2.72216	11.3238	5.45036	19.612
ENSG00000010803	SCMH1	62.6987	38.8284	44.4505	66.8351	59.8874	71.7176	4.67174	36.1273
ENSG00000010810	FYN	278.901	179.905	71.262	23.352	343.899	33.9715	73.1906	151.735
ENSG00000010818	HIVEP2	17.2962	49.1827	44.4505	97.4343	71.6834	149.097	148.717	119.736
ENSG00000010932	FMO1	0	0	0	0	0	0	0	0
ENSG00000011007	ELOA	150.261	151.431	185.563	118.371	166.052	120.788	169.74	234.311
ENSG00000011009	LYPLA2	270.253	203.202	421.927	152.191	197.81	108.52	261.617	199.216
ENSG00000011021	CLCN6	23.7823	24.5913	26.1059	43.4831	16.3329	30.1969	14.7938	28.9018
ENSG00000011028		0	0	1.41113	4.83145	0.907385	0.943653	1.55725	0
ENSG00000011052	NME1-NME2	0	0	0	0	0	0	0	0
ENSG00000011083	SLC6A7	18.3772	11.6485	2.82226	0	5.44431	0	0	5.16104
ENSG00000011105	TSPAN9	73.5089	15.5314	31.0448	29.7939	32.6659	25.4786	19.4656	18.5798
ENSG00000011114	BTBD7	462.673	535.832	407.816	537.902	557.135	568.079	401.77	468.623
ENSG00000011132	APBA3	18.3772	25.8856	45.8617	47.5093	56.2579	56.6192	42.0457	31.9985
ENSG00000011143	MKS1	30.2684	32.357	19.7558	23.352	28.1289	33.0279	13.2366	15.4831
ENSG00000011198	ABHD5	24.8633	10.3543	21.8725	8.05242	29.0363	9.43653	63.0685	10.3221
ENSG00000011201	ANOS1	0	0	0	0	0	0	0	0
ENSG00000011243	AKAP8L	44.3215	56.9484	69.1453	45.8988	87.109	102.858	104.336	85.6733
ENSG00000011258	MBTD1	18.3772	99.6597	41.6283	59.5879	20.8699	12.2675	36.5953	40.2561
ENSG00000011260	UTP18	84.319	76.3626	121.357	218.221	77.1278	213.266	104.336	171.347
ENSG00000011275	RNF216	207.554	235.559	567.979	218.221	258.605	352.926	590.196	282.825
ENSG00000011295	TTC19	279.982	256.268	356.31	251.235	259.512	173.632	287.312	231.215
ENSG00000011304	PTBP1	1072.36	790.806	1038.59	788.332	1283.04	1040.85	982.622	1248.97
ENSG00000011332	DPF1	4.32405	0	10.5835	10.4681	0	2.83096	3.11449	0
ENSG00000011347	SYT7	234.58	125.545	150.285	157.022	106.164	105.689	136.259	103.221
ENSG00000011376	LARS2	49.7266	22.0028	61.3841	19.3258	53.5357	27.3659	114.458	31.9985
ENSG00000011405	PIK3C2A	556.721	497.004	578.563	227.883	556.227	284.04	810.547	468.623
ENSG00000011422	PLAUR	169.719	100.954	529.173	238.352	725.908	1049.34	2004.95	334.436
ENSG00000011426	ANLN	343.762	148.842	103.012	528.239	89.8311	301.025	23.3587	92.8988
ENSG00000011451	WIZ	129.722	66.0083	103.718	118.371	166.959	98.1399	91.8775	139.348
ENSG00000011454	RABGAP1	483.213	396.05	357.016	671.572	457.322	565.248	492.09	577.005
ENSG00000011465	DCN	1.08101	0	0.705564	1.61048	0.907385	0	0	0
ENSG00000011478	QPCTL	6.48608	7.76569	0.705564	16.9101	0.907385	5.66192	0	2.06442
ENSG00000011485	PPP5C	39.9975	31.0628	32.456	51.5355	17.2403	31.1405	46.7174	40.2561
ENSG00000011523	CEP68	61.6177	80.2454	47.9784	49.1198	37.2028	39.6334	40.4884	22.7086
ENSG00000011566	MAP4K3	123.235	151.431	67.7342	130.449	128.849	163.252	184.534	73.2868
ENSG00000011590	ZBTB32	0	0	2.11669	0	0	0	1.55725	0
ENSG00000011600	TYROBP	0	0	0	0	0	0	0	0
ENSG00000011638	TMEM159	209.716	95.7768	64.2063	270.561	272.216	191.562	82.5341	27.8696
ENSG00000011677	GABRA3	17.2962	0	13.4057	4.02621	6.3517	0	0	1.03221
ENSG00000012048	BRCA1	111.344	302.862	141.818	158.633	42.6471	129.28	67.7402	121.801
ENSG00000012061	ERCC1	56.2127	23.2971	54.3284	45.0935	26.3142	36.8025	53.725	39.2239
ENSG00000012124	CD22	2.16203	0	23.2836	1.61048	9.98124	0.943653	34.2594	0
ENSG00000012171	SEMA3B	51.8886	9.05997	62.0897	33.0149	125.219	26.4223	121.465	33.0307
ENSG00000012174	MBTPS2	38.9165	38.8284	100.896	46.704	58.98	50.0136	83.3127	51.6104
ENSG00000012211	PRICKLE3	1.08101	7.76569	5.64451	8.05242	3.62954	10.3802	3.89312	1.03221
ENSG00000012223	LTF	2.16203	2.58856	4.93895	0	0	0	0	0
ENSG00000012232	EXTL3	59.4557	14.2371	33.1615	57.9774	77.1278	64.1684	42.0457	29.9341
ENSG00000012504	NR1H4	0	0	0	0	0	0	0	0
ENSG00000012660	ELOVL5	105.939	98.3654	48.6839	202.116	36.2954	119.844	38.9312	68.1258
ENSG00000012779	ALOX5	4.32405	1.29428	0	0.805242	2.72216	3.77461	0	0
ENSG00000012817	KDM5D	46.4835	0	0	0	37.2028	0	0	0
ENSG00000012822	CALCOCO1	78.9139	24.5913	67.7342	25.7677	104.349	47.1826	106.671	47.4816
ENSG00000012963	UBR7	44.3215	54.3598	50.8006	113.539	9.98124	96.2526	31.9236	44.385
ENSG00000012983	MAP4K5	171.881	141.077	125.59	85.3556	269.493	189.674	177.526	279.729
ENSG00000013016	EHD3	1.08101	0	1.41113	0	0	0	0	0
ENSG00000013275	PSMC4	423.757	276.976	927.111	333.37	705.946	485.038	1166.38	506.815
ENSG00000013288	MAN2B2	37.8354	15.5314	69.1453	41.0673	23.592	29.2532	71.6333	21.6764
ENSG00000013293	SLC7A14	0	0	0	0	0	0	0	0
ENSG00000013297	CLDN11	0	2.58856	0.705564	0.805242	0	2.83096	0	2.06442
ENSG00000013306	SLC25A39	366.463	322.276	591.263	515.355	498.155	474.657	643.143	447.979
ENSG00000013364	MVP	269.172	166.962	580.679	230.299	310.326	170.801	823.783	239.472
ENSG00000013374	NUB1	378.354	301.568	573.624	385.711	1961.77	1972.23	2708.83	1723.79
ENSG00000013375	PGM3	100.534	348.162	107.951	146.554	158.792	276.49	252.274	357.144
ENSG00000013392	RWDD2A	5.40506	9.05997	17.6391	12.8839	14.5182	11.3238	23.3587	21.6764
ENSG00000013441	CLK1	75.6709	218.734	158.752	176.348	184.199	265.166	203.999	295.212
ENSG00000013503	POLR3B	81.0759	62.1255	62.7952	24.9625	80.7573	46.239	63.8471	133.155
ENSG00000013523	ANGEL1	27.0253	33.6513	39.5116	47.5093	36.2954	37.7461	45.9388	15.4831
ENSG00000013561	RNF14	69.1848	68.5969	94.5456	98.2395	60.7948	86.8161	72.412	63.9969
ENSG00000013563	DNASE1L1	44.3215	36.2399	57.1507	39.4569	18.1477	31.1405	40.4884	14.4509
ENSG00000013573	DDX11	94.0481	121.662	31.7504	66.8351	31.7585	73.6049	6.22899	18.5798
ENSG00000013583	HEBP1	178.367	77.6569	121.357	86.9661	159.7	50.0136	73.1906	36.1273
ENSG00000013588	GPRC5A	2800.9	643.258	2638.81	2492.22	3470.75	1258.83	3951.51	1420.32
ENSG00000013619	MAMLD1	6.48608	6.47141	0.705564	0	0	0	0	2.06442
ENSG00000013725	CD6	0	1.29428	0.705564	0	0	0	0	0
ENSG00000013810	TACC3	252.957	223.911	246.242	509.718	134.293	594.501	86.4272	218.828
ENSG00000014123	UFL1	191.339	258.856	213.08	214.194	181.477	243.462	271.739	399.465
ENSG00000014138	POLA2	42.1595	16.8257	40.2172	29.7939	10.8886	30.1969	21.8014	10.3221
ENSG00000014164	ZC3H3	16.2152	11.6485	11.9946	41.8726	20.8699	50.9573	17.9083	42.3206
ENSG00000014216	CAPN1	238.904	73.774	360.543	284.25	382.917	247.237	411.113	180.637
ENSG00000014257	ACPP	5.40506	22.0028	1.41113	0.805242	18.1477	14.1548	2.33587	10.3221
ENSG00000014641	MDH1	121.073	148.842	132.646	305.187	50.8136	193.449	100.442	106.318
ENSG00000014824	SLC30A9	204.311	163.079	119.24	177.958	182.384	181.181	197.77	101.156
ENSG00000014914	MTMR11	55.1316	32.357	36.6893	202.116	147.904	394.447	96.5493	141.413
ENSG00000014919	COX15	165.395	113.897	140.407	193.258	183.292	169.858	125.358	106.318
ENSG00000015133	CCDC88C	141.613	78.9512	119.946	106.292	123.404	112.295	68.5188	99.0921
ENSG00000015153	YAF2	185.934	214.851	136.879	160.243	252.253	216.097	180.641	147.606
ENSG00000015171	ZMYND11	439.972	226.499	491.073	257.677	592.523	232.139	432.136	298.308
ENSG00000015285	WAS	0	9.05997	5.64451	2.41573	0	4.71826	6.22899	1.03221
ENSG00000015413	DPEP1	401.056	104.837	483.312	28.9887	274.03	25.4786	309.892	46.4494
ENSG00000015475	BID	163.233	44.0056	155.93	176.348	88.9238	169.858	87.2058	51.6104
ENSG00000015479	MATR3	889.673	978.477	867.138	984.006	862.923	821.922	942.134	945.503
ENSG00000015520	NPC1L1	31.3494	7.76569	0.705564	1.61048	8.16647	2.83096	0	1.03221
ENSG00000015532	XYLT2	24.8633	34.9456	38.806	28.9887	33.5733	48.1263	18.687	26.8374
ENSG00000015568	RGPD5	0	0	0	0	0	0	0	0
ENSG00000015592	STMN4	0	0	0	0	0	0	0	0
ENSG00000015676	NUDCD3	322.142	315.805	444.505	168.296	302.159	160.421	407.22	323.081
ENSG00000016082	ISL1	0	7.76569	6.35008	0	0	0	2.33587	14.4509
ENSG00000016391	CHDH	170.8	405.11	366.893	133.67	74.4056	58.5065	172.854	120.768
ENSG00000016402	IL20RA	294.035	58.2427	263.175	325.318	92.5533	204.773	140.152	65.0292
ENSG00000016490	CLCA1	0	9849.48	0	0	0	0	0	455.204
ENSG00000016602	CLCA4	0	0	0	0	0	0	3.11449	2.06442
ENSG00000016864	GLT8D1	46.4835	78.9512	63.5008	57.1722	31.7585	36.8025	42.8243	42.3206
ENSG00000017260	ATP2C1	164.314	194.142	168.63	183.595	252.253	206.66	109.786	281.793
ENSG00000017427	IGF1	89.724	6.47141	6.35008	22.5468	18.1477	5.66192	0.778623	0
ENSG00000017483	SLC38A5	55.1316	144.96	182.036	21.7415	68.0539	26.4223	117.572	183.733
ENSG00000017797	RALBP1	342.681	392.167	239.186	335.786	276.753	266.11	193.099	251.859
ENSG00000018189	RUFY3	84.319	160.491	117.829	136.891	128.849	190.618	128.473	94.9632
ENSG00000018236	CNTN1	0	0	0	2.41573	0	0	0	0
ENSG00000018280	SLC11A1	1.08101	0	6.35008	2.41573	2.72216	1.88731	1.55725	3.09663
ENSG00000018408	WWTR1	233.499	58.2427	68.4397	826.178	286.734	424.644	142.488	17.5476
ENSG00000018510	AGPS	134.046	232.971	166.513	218.221	126.127	154.759	125.358	248.762
ENSG00000018610	CXorf56	55.1316	69.8912	86.0788	77.3032	65.3317	61.3374	114.458	100.124
ENSG00000018625	ATP1A2	0	0	0	0	0	0	0	0
ENSG00000018699	TTC27	38.9165	31.0628	27.517	96.629	29.9437	45.2953	3.11449	34.0629
ENSG00000018869	ZNF582	1.08101	0	3.52782	0	0	0	7.00761	0
ENSG00000019102	VSIG2	1.08101	29.7685	1.41113	0	0.907385	0	0	25.8052
ENSG00000019144	PHLDB1	139.451	88.0111	64.9119	61.1984	66.2391	16.0421	132.366	45.4172
ENSG00000019169	MARCO	0	0	0	0	0	0	0	0
ENSG00000019186	CYP24A1	10.8101	2.58856	4.93895	2.41573	0.907385	7.54922	0.778623	0
ENSG00000019485	PRDM11	25.9443	9.05997	51.5062	12.0786	22.6846	8.49288	26.4732	18.5798
ENSG00000019505	SYT13	23.7823	2.58856	7.05564	24.1573	12.7034	42.4644	9.34348	1.03221
ENSG00000019549	SNAI2	0	0	1.41113	8.05242	0	41.5207	8.56486	0
ENSG00000019582	CD74	532.939	55.6541	143.23	9.6629	5084.08	3574.56	5448.81	2897.41
ENSG00000019991	HGF	0	0	0	0	0	0	0	0
ENSG00000019995	ZRANB1	152.423	157.902	161.574	231.91	215.05	240.631	202.442	190.959
ENSG00000020129	NCDN	96.2101	72.4798	25.4003	31.4044	67.1465	50.0136	50.6105	109.414
ENSG00000020181	ADGRA2	1.08101	0	1.41113	1.61048	0.907385	4.71826	5.45036	5.16104
ENSG00000020256	ZFP64	36.7544	45.2998	133.352	64.4193	34.4806	84.9288	107.45	54.7071
ENSG00000020426	MNAT1	69.1848	81.5397	72.6731	81.3294	73.4982	79.2668	73.9692	87.7378
ENSG00000020577	SAMD4A	44.3215	11.6485	36.6893	46.704	95.2755	66.9994	55.2822	74.319
ENSG00000020633	RUNX3	1.08101	19.4142	105.129	147.359	0	177.407	158.061	54.7071
ENSG00000020922	MRE11	282.144	339.102	298.454	211.779	125.219	130.224	178.305	139.348
ENSG00000021300	PLEKHB1	4.32405	72.4798	112.89	62.8089	3.62954	14.1548	52.1678	24.773
ENSG00000021355	SERPINB1	1033.45	1507.84	527.762	600.71	1809.33	1839.18	1443.57	2058.22
ENSG00000021461	CYP3A43	0	2.58856	0	0	0	0	0	0
ENSG00000021488	SLC7A9	0	0	0	0	0	0.943653	0	2.06442
ENSG00000021574	SPAST	96.2101	59.5369	74.7898	63.6141	128.849	80.2105	98.8851	90.8344
ENSG00000021645	NRXN3	300.521	249.796	21.1669	0	37.2028	0	2.33587	31.9985
ENSG00000021762	OSBPL5	37.8354	42.7113	100.19	95.0185	36.2954	104.745	120.687	65.0292
ENSG00000021776	AQR	285.387	267.916	306.92	206.142	320.307	213.266	284.976	193.023
ENSG00000021826	CPS1	0	34.9456	0	0	0	0.943653	1.55725	1.03221
ENSG00000021852	C8B	0	0	0	0	0	0	0	0
ENSG00000022267	FHL1	0	2.58856	0.705564	0	0	0	0.778623	5.16104
ENSG00000022277	RTF2	318.899	398.639	1002.61	525.823	475.47	722.838	1102.53	394.304
ENSG00000022355	GABRA1	0	0	0	0	1.81477	0	1.55725	1.03221
ENSG00000022556	NLRP2	0	0	0	137.696	0	49.07	0	0
ENSG00000022567	SLC45A4	63.7797	124.251	36.6893	139.307	117.053	179.294	53.725	186.83
ENSG00000022840	RNF10	277.82	190.259	247.653	423.557	539.894	407.658	316.9	298.308
ENSG00000022976	ZNF839	112.425	60.8312	83.2566	67.6403	71.6834	66.0557	49.0533	81.5445
ENSG00000023041	ZDHHC6	97.2911	138.488	98.779	186.816	83.4795	133.055	143.267	113.543
ENSG00000023171	GRAMD1B	2.16203	3.88284	2.11669	3.22097	32.6659	14.1548	31.9236	7.22546
ENSG00000023191	RNH1	262.686	73.774	495.306	281.835	394.713	292.532	438.365	107.35
ENSG00000023228	NDUFS1	283.225	414.17	338.671	454.156	318.492	372.743	347.266	403.594
ENSG00000023287	RB1CC1	385.921	834.811	333.732	690.092	494.525	848.344	515.449	913.505
ENSG00000023318	ERP44	394.57	240.736	220.136	272.977	568.023	390.672	420.457	349.919
ENSG00000023330	ALAS1	100.534	71.1855	103.012	110.318	260.42	144.379	221.908	187.862
ENSG00000023445	BIRC3	127.559	478.884	153.813	101.46	312.141	224.589	479.632	508.879
ENSG00000023516	AKAP11	407.542	781.746	307.626	317.265	388.361	297.251	363.617	853.637
ENSG00000023572	GLRX2	59.4557	41.417	87.49	42.6778	73.4982	56.6192	121.465	89.8022
ENSG00000023608	SNAPC1	47.5646	72.4798	47.2728	82.1347	34.4806	69.8303	43.6029	48.5138
ENSG00000023697	DERA	255.119	350.75	91.0178	107.902	248.624	80.2105	35.038	312.759
ENSG00000023734	STRAP	376.192	585.015	186.269	254.456	428.286	242.519	184.534	832.993
ENSG00000023839	ABCC2	118.911	2.58856	50.8006	0	88.9238	3.77461	31.9236	3.09663
ENSG00000023892	DEF6	15.1342	12.9428	11.289	42.6778	60.7948	60.3938	20.2442	33.0307
ENSG00000023902	PLEKHO1	2.16203	2.58856	1.41113	1.61048	0	0.943653	1.55725	0
ENSG00000023909	GCLM	109.182	190.259	94.5456	178.764	161.515	234.026	169.74	189.926
ENSG00000024048	UBR2	224.851	402.521	251.181	136.086	627.003	366.137	630.685	649.259
ENSG00000024422	EHD2	7.56709	5.17713	2.82226	9.6629	8.16647	7.54922	10.1221	9.28988
ENSG00000024526	DEPDC1	86.481	198.025	22.5781	89.3818	85.2942	124.562	8.56486	94.9632
ENSG00000024862	CCDC28A	54.0506	195.436	134.057	169.906	63.517	152.872	203.999	195.087
ENSG00000025039	RRAGD	1.08101	2.58856	28.2226	0.805242	0	7.54922	77.8623	1.03221
ENSG00000025156	HSF2	35.6734	34.9456	50.8006	53.9512	29.0363	54.7319	15.5725	15.4831
ENSG00000025293	PHF20	228.094	212.262	252.592	321.292	169.681	203.829	161.175	132.123
ENSG00000025423	HSD17B6	0	2.58856	0	4.02621	0	0.943653	0	2.06442
ENSG00000025434	NR1H3	37.8354	15.5314	68.4397	47.5093	19.0551	28.3096	37.3739	21.6764
ENSG00000025708	TYMP	11.8911	6.47141	34.5726	23.352	167.866	787.95	820.669	142.445
ENSG00000025770	NCAPH2	47.5646	91.894	84.6677	38.6516	24.4994	44.3517	106.671	62.9647
ENSG00000025772	TOMM34	272.415	236.853	305.509	238.352	253.161	200.998	311.449	345.79
ENSG00000025796	SEC63	347.005	667.849	453.678	602.321	508.136	659.613	709.326	1010.53
ENSG00000025800	KPNA6	728.602	363.693	341.493	405.842	840.239	418.982	301.327	380.885
ENSG00000026025	VIM	0	0	0	0	1.81477	2.83096	0	0
ENSG00000026036	RTEL1-TNFRSF6B	0	0	0.705564	2.41573	0	20.7604	0	0
ENSG00000026103	FAS	29.1873	2.58856	0	12.0786	121.59	81.1542	26.4732	36.1273
ENSG00000026297	RNASET2	402.137	201.908	388.06	174.737	319.4	62.2811	182.198	156.896
ENSG00000026508	CD44	343.762	442.644	81.1399	210.973	136.108	137.773	167.404	244.634
ENSG00000026559	KCNG1	1.08101	0	68.4397	3.22097	12.7034	9.43653	45.1601	0
ENSG00000026652	AGPAT4	0	6.47141	5.64451	12.0786	3.62954	6.60557	6.22899	0
ENSG00000026751	SLAMF7	0	0	0	0	0	0	1.55725	0
ENSG00000026950	BTN3A1	33.5114	91.894	33.1615	11.2734	347.529	314.236	405.663	507.847
ENSG00000027001	MIPEP	174.043	121.662	50.8006	73.277	151.533	57.5628	23.3587	216.764
ENSG00000027075	PRKCH	11.8911	25.8856	6.35008	14.4944	11.796	11.3238	22.5801	10.3221
ENSG00000027644	INSRR	0	0	0	0	0	0	0	0
ENSG00000027697	IFNGR1	63.7797	29.7685	54.3284	91.7976	105.257	68.8867	61.5112	41.2884
ENSG00000027847	B4GALT7	70.2658	51.7713	117.124	33.0149	96.1828	35.8588	93.4348	106.318
ENSG00000027869	SH2D2A	56.2127	2.58856	37.3949	30.5992	72.5908	41.5207	3.89312	3.09663
ENSG00000028116	VRK2	130.803	130.722	137.585	107.902	187.829	232.139	144.045	84.6411
ENSG00000028137	TNFRSF1B	401.056	161.785	100.896	245.599	863.831	396.334	351.938	315.856
ENSG00000028203	VEZT	239.985	345.573	263.175	258.483	437.36	444.461	281.862	354.048
ENSG00000028277	POU2F2	14.0532	10.3543	20.4614	53.146	20.8699	25.4786	23.3587	8.25767
ENSG00000028310	BRD9	298.359	301.568	313.271	264.925	178.755	265.166	234.366	177.54
ENSG00000028528	SNX1	123.235	113.897	140.407	105.487	150.626	133.999	151.053	91.8666
ENSG00000028839	TBPL1	19.4582	125.545	45.1561	62.0036	26.3142	74.5486	42.8243	110.446
ENSG00000029153	ARNTL2	45.4025	200.614	46.5672	33.0149	146.089	118.9	170.518	334.436
ENSG00000029363	BCLAF1	577.261	890.466	1143.01	553.201	636.985	556.755	958.485	1020.85
ENSG00000029364	SLC39A9	168.638	133.311	201.791	288.277	161.515	220.815	255.388	170.314
ENSG00000029534	ANK1	10.8101	0	2.82226	0	9.98124	0.943653	8.56486	6.19325
ENSG00000029559	IBSP	0	3.88284	0	0	0	0	0	0
ENSG00000029639	TFB1M	109.182	151.431	98.779	145.749	122.497	156.646	71.6333	121.801
ENSG00000029725	RABEP1	116.749	196.731	221.547	57.9774	94.3681	106.633	169.74	138.316
ENSG00000029993	HMGB3	163.233	199.319	326.676	239.962	86.2016	141.548	255.388	104.253
ENSG00000030066	NUP160	51.8886	62.1255	62.0897	63.6141	52.6283	82.0978	76.3051	78.4479
ENSG00000030110	BAK1	54.0506	29.7685	62.7952	33.0149	228.661	162.308	102.778	103.221
ENSG00000030304	MUSK	0	0	0	0	0	0	0	0
ENSG00000030419	IKZF2	8.6481	64.7141	2.82226	20.131	1.81477	14.1548	0.778623	15.4831
ENSG00000030582	GRN	956.696	535.832	2617.64	1099.96	898.311	985.174	2586.59	453.14
ENSG00000031003	FAM13B	27.0253	124.251	34.5726	29.7939	43.5545	34.9152	53.725	59.8681
ENSG00000031081	ARHGAP31	0	40.1227	0	2.41573	0	13.2111	3.11449	12.3865
ENSG00000031691	CENPQ	46.4835	84.1283	19.7558	46.704	12.7034	81.1542	12.458	44.385
ENSG00000031698	SARS	817.245	1035.43	665.347	635.336	1376.5	1274.88	855.707	1841.46
ENSG00000031823	RANBP3	157.828	108.72	166.513	90.1871	152.441	125.506	133.145	167.218
ENSG00000032219	ARID4A	149.18	297.685	253.298	252.041	194.18	211.378	295.877	297.276
ENSG00000032389	EIPR1	64.8608	33.6513	65.6175	123.202	46.2767	143.435	56.8395	26.8374
ENSG00000032444	PNPLA6	88.643	33.6513	59.2674	49.1198	49.9062	22.6477	46.7174	57.8037
ENSG00000032742	IFT88	102.696	342.985	68.4397	37.0411	63.517	33.9715	100.442	260.117
ENSG00000033011	ALG1	131.884	112.602	120.651	79.7189	69.8687	54.7319	63.8471	43.3528
ENSG00000033030	ZCCHC8	60.5367	124.251	113.596	66.0298	112.516	101.915	135.48	155.864
ENSG00000033050	ABCF2	203.23	160.491	96.6623	128.033	176.94	126.449	84.0913	146.574
ENSG00000033100	CHPF2	176.205	40.1227	104.424	46.704	129.756	20.7604	116.015	44.385
ENSG00000033122	LRRC7	0	1.29428	0	0	0	0	0	3.09663
ENSG00000033170	FUT8	140.532	238.148	100.896	231.104	95.2755	140.604	61.5112	83.6089
ENSG00000033178	UBA6	417.271	309.333	278.698	419.531	603.411	888.921	645.479	554.296
ENSG00000033327	GAB2	6.48608	27.1799	53.6229	35.4306	3.62954	48.1263	69.2975	14.4509
ENSG00000033627	ATP6V0A1	148.099	147.548	216.608	55.5617	76.2204	25.4786	176.747	87.7378
ENSG00000033800	PIAS1	51.8886	146.254	174.98	163.464	64.4244	140.604	237.48	238.44
ENSG00000033867	SLC4A7	288.63	306.745	137.585	254.456	302.159	318.955	126.137	161.025
ENSG00000034053	APBA2	1.08101	0	0	0	0	0	10.1221	0
ENSG00000034152	MAP2K3	355.653	330.042	790.938	240.767	529.913	286.87	609.662	371.595
ENSG00000034239	EFCAB1	0	0	0	0	0	0	0	0
ENSG00000034510	TMSB10	4282.97	4421.27	5013.03	7210.94	3940.77	7221.78	4611.01	3450.67
ENSG00000034533	ASTE1	24.8633	45.2998	38.1005	37.8464	4.53693	22.6477	22.5801	18.5798
ENSG00000034677	RNF19A	83.238	156.608	97.3679	171.517	195.995	324.617	173.633	258.052
ENSG00000034693	PEX3	15.1342	24.5913	38.1005	37.0411	15.4256	36.8025	46.7174	69.158
ENSG00000034713	GABARAPL2	227.013	276.976	340.788	219.026	226.846	168.914	417.342	366.434
ENSG00000034971	MYOC	0	0	0	0	0	0	0	0
ENSG00000035115	SH3YL1	343.762	247.208	263.881	315.655	277.66	304.8	200.106	114.575
ENSG00000035141	FAM136A	109.182	191.554	117.124	155.412	137.923	112.295	102	213.667
ENSG00000035403	VCL	303.765	265.328	155.224	233.52	172.403	205.716	131.587	181.669
ENSG00000035499	DEPDC1B	38.9165	107.425	57.1507	97.4343	26.3142	64.1684	17.9083	36.1273
ENSG00000035664	DAPK2	11.8911	103.543	105.835	25.7677	17.2403	13.2111	45.1601	17.5476
ENSG00000035681	NSMAF	109.182	55.6541	68.4397	111.123	134.293	117.013	36.5953	148.638
ENSG00000035687	ADSS	317.818	102.248	285.048	319.681	282.197	259.505	351.159	124.897
ENSG00000035720	STAP1	0	0	0	0	0	0	0	0
ENSG00000035862	TIMP2	197.825	62.1255	273.759	250.43	594.337	195.336	544.258	82.5767
ENSG00000035928	RFC1	258.362	535.832	211.669	742.433	509.043	1138.05	430.579	665.775
ENSG00000036054	TBC1D23	55.1316	116.485	91.0178	90.1871	104.349	96.2526	111.343	165.153
ENSG00000036257	CUL3	225.932	293.802	225.781	264.925	304.881	328.391	246.824	405.658
ENSG00000036448	MYOM2	25.9443	1.29428	38.806	0	9.98124	3.77461	24.9159	1.03221
ENSG00000036473	OTC	0	2.58856	0	0	0	0	0	0
ENSG00000036530	CYP46A1	0	0	0	0	0	0	0	0
ENSG00000036549		212.959	511.241	115.007	231.104	234.105	221.758	86.4272	504.75
ENSG00000036565	SLC18A1	0	1.29428	0	0	0	0.943653	0	0
ENSG00000036672	USP2	7.56709	0	1.41113	10.4681	2.72216	4.71826	9.34348	22.7086
ENSG00000036828	CASR	0	0	0	0	0	0	0	0
ENSG00000037042	TUBG2	30.2684	12.9428	14.8168	17.7153	11.796	22.6477	4.67174	30.9663
ENSG00000037241	RPL26L1	118.911	110.014	129.824	132.06	117.053	103.802	116.015	74.319
ENSG00000037280	FLT4	0	0	0	0	0	0	0	0
ENSG00000037474	NSUN2	191.339	177.317	220.136	287.471	210.513	351.039	166.625	245.666
ENSG00000037637	FBXO42	38.9165	75.0683	64.9119	11.2734	38.1102	33.0279	84.8699	51.6104
ENSG00000037749	MFAP3	42.1595	28.4742	35.9838	31.4044	24.4994	17.9294	66.183	39.2239
ENSG00000037757	MRI1	41.0785	103.543	26.1059	41.0673	15.4256	31.1405	13.2366	42.3206
ENSG00000037897	METTL1	96.2101	73.774	176.391	45.0935	60.7948	39.6334	94.2134	77.4157
ENSG00000037965		0	0	4.93895	3.22097	0	7.54922	0	0
ENSG00000038002	AGA	96.2101	82.834	188.386	41.8726	166.959	60.3938	274.075	252.891
ENSG00000038210	PI4K2B	36.7544	53.0655	45.1561	82.1347	29.9437	86.8161	29.5877	35.0951
ENSG00000038219	BOD1L1	468.078	656.201	699.92	700.56	466.396	653.951	921.89	456.236
ENSG00000038274	MAT2B	71.3468	104.837	56.4451	157.022	44.4619	127.393	84.8699	121.801
ENSG00000038295	TLL1	0	0	0	0	0	0	0	0
ENSG00000038358	EDC4	0	1.29428	2.11669	0	8.16647	1.88731	1.55725	0
ENSG00000038382	TRIO	124.316	297.685	89.6067	250.43	183.292	347.264	173.633	134.187
ENSG00000038427	VCAN	0	20.7085	0	888.987	0	190.618	0	0
ENSG00000038532	CLEC16A	30.2684	56.9484	41.6283	17.7153	53.5357	28.3096	59.1754	43.3528
ENSG00000038945	MSR1	1.08101	0	0	0	0	0	0	0
ENSG00000039068	CDH1	1057.23	678.203	1790.02	1045.2	1210.45	942.709	1368.04	1632.95
ENSG00000039123	MTREX	197.825	298.979	235.658	283.445	264.957	345.377	219.572	274.568
ENSG00000039139	DNAH5	1.08101	15.5314	0	9.6629	3.62954	15.0984	0.778623	13.4187
ENSG00000039319	ZFYVE16	84.319	94.4825	98.0734	79.7189	104.349	85.8724	159.618	101.156
ENSG00000039523	RIPOR1	91.8861	51.7713	53.6229	70.8613	112.516	64.1684	102.778	51.6104
ENSG00000039537	C6	0	0	0	0	0	0	0	0
ENSG00000039560	RAI14	131.884	10.3543	15.5224	130.449	186.921	117.957	8.56486	1.03221
ENSG00000039600	SOX30	1.08101	0	0.705564	0	0.907385	1.88731	0	0
ENSG00000039650	PNKP	134.046	107.425	220.842	112.734	43.5545	71.7176	130.03	55.7393
ENSG00000039987	BEST2	0	0	0	0	0	0	0	2.06442
ENSG00000040199	PHLPP2	19.4582	60.8312	36.6893	13.6891	23.592	2.83096	51.3891	72.2546
ENSG00000040275	SPDL1	112.425	150.137	110.774	100.655	127.034	164.196	36.5953	148.638
ENSG00000040341	STAU2	436.729	626.432	352.077	372.827	314.863	430.306	365.953	514.04
ENSG00000040487	PQLC2	19.4582	18.1199	38.1005	5.63669	12.7034	6.60557	76.3051	24.773
ENSG00000040531	CTNS	17.2962	28.4742	49.3895	21.7415	19.9625	5.66192	23.3587	16.5153
ENSG00000040608	RTN4R	44.3215	1.29428	96.6623	94.2133	16.3329	55.6755	152.61	2.06442
ENSG00000040633	PHF23	122.154	99.6597	153.813	68.4456	88.0164	49.07	163.511	121.801
ENSG00000040731	CDH10	0	0	0	0	0	0	0	0
ENSG00000040933	INPP4A	29.1873	45.2998	33.8671	69.2508	57.1653	67.943	16.3511	23.7408
ENSG00000041353	RAB27B	36.7544	31.0628	2.11669	11.2734	95.2755	80.2105	6.22899	103.221
ENSG00000041357	PSMA4	458.349	463.353	619.485	527.433	1782.1	1309.79	2459.67	1850.75
ENSG00000041515	MYO16	0	0	0	0	0	1.88731	0	0
ENSG00000041802	LSG1	185.934	332.63	349.254	292.303	224.124	392.56	258.503	469.655
ENSG00000041880	PARP3	86.481	11.6485	87.49	8.05242	130.663	34.9152	133.923	67.0936
ENSG00000041982	TNC	0	0	0.705564	0	0	0	5.45036	1.03221
ENSG00000041988	THAP3	23.7823	12.9428	63.5008	34.6254	45.3693	86.8161	94.2134	30.9663
ENSG00000042062	RIPOR3	4.32405	0	4.23339	0	0	0	0	0
ENSG00000042088	TDP1	69.1848	42.7113	75.4954	75.6927	90.7385	85.8724	45.1601	34.0629
ENSG00000042286	AIFM2	98.3721	37.5342	103.718	82.1347	109.794	98.1399	189.984	49.546
ENSG00000042304	C2orf83	0	0	0	0	0	0	0	0
ENSG00000042317	SPATA7	18.3772	32.357	11.9946	47.5093	19.9625	53.7882	10.9007	22.7086
ENSG00000042429	MED17	59.4557	54.3598	73.3787	28.9887	38.1102	44.3517	81.7554	22.7086
ENSG00000042445	RETSAT	161.071	154.019	337.965	237.546	691.428	339.715	447.708	471.719
ENSG00000042493	CAPG	444.296	198.025	191.208	182.79	881.071	218.927	411.113	245.666
ENSG00000042753	AP2S1	398.894	198.025	355.604	304.381	256.79	208.547	320.014	203.345
ENSG00000042781	USH2A	4.32405	7.76569	0	0	0	0	3.89312	1.03221
ENSG00000042813	ZPBP	0	0	0	0	0	0	0	0
ENSG00000042832	TG	24.8633	10.3543	41.6283	0	3.62954	1.88731	4.67174	0
ENSG00000042980	ADAM28	0	1.29428	0	0	0	0	0	0
ENSG00000043039	BARX2	2.16203	5.17713	2.11669	29.7939	0.907385	8.49288	2.33587	4.12884
ENSG00000043093	DCUN1D1	72.4278	176.022	47.9784	146.554	94.3681	115.126	28.0304	84.6411
ENSG00000043143	JADE2	138.37	115.191	166.513	156.217	330.288	224.589	237.48	248.762
ENSG00000043355	ZIC2	0	3.88284	0.705564	27.3782	0	16.9858	3.11449	0
ENSG00000043462	LCP2	0	0	0	0	0	0	0	0
ENSG00000043514	TRIT1	61.6177	150.137	17.6391	48.3145	30.8511	57.5628	3.11449	98.0598
ENSG00000043591	ADRB1	0	42.7113	3.52782	10.4681	0.907385	10.3802	0	23.7408
ENSG00000044012	GUCA2B	2.16203	11.6485	0	0	3.62954	0	0	31.9985
ENSG00000044090	CUL7	45.4025	54.3598	40.2172	59.5879	56.2579	40.5771	53.725	34.0629
ENSG00000044115	CTNNA1	718.873	386.99	613.841	479.119	1085.23	535.051	1095.52	699.838
ENSG00000044446	PHKA2	43.2405	75.0683	69.8509	56.3669	30.8511	49.07	64.6257	33.0307
ENSG00000044459	CNTLN	3.24304	10.3543	0.705564	0	0.907385	0	0	3.09663
ENSG00000044524	EPHA3	0	0	0	0	0	0	0	0
ENSG00000044574	HSPA5	2029.06	1827.53	5254.34	2468.87	5909.8	4968.33	11723.7	4528.3
ENSG00000046604	DSG2	754.547	737.74	549.635	864.83	885.608	867.217	662.608	531.588
ENSG00000046647	GEMIN8	36.7544	23.2971	69.8509	44.2883	22.6846	19.8167	87.2058	19.612
ENSG00000046651	OFD1	179.448	198.025	408.522	168.296	263.142	259.505	499.097	265.278
ENSG00000046653	GPM6B	3.24304	11.6485	0	0	0.907385	0	0	6.19325
ENSG00000046774	MAGEC2	0	0	0	0	0	0	0	0
ENSG00000046889	PREX2	0	0	0	0	0	0	0	0
ENSG00000047056	WDR37	23.7823	18.1199	25.4003	23.352	22.6846	22.6477	18.687	30.9663
ENSG00000047188	YTHDC2	76.7519	58.2427	56.4451	62.0036	79.8499	60.3938	73.1906	38.1917
ENSG00000047230	CTPS2	67.0228	73.774	76.2009	60.3931	43.5545	57.5628	52.9464	54.7071
ENSG00000047249	ATP6V1H	89.724	174.728	73.3787	127.228	102.535	82.0978	95.7707	148.638
ENSG00000047315	POLR2B	287.549	283.448	215.197	443.688	295.808	373.687	231.251	378.821
ENSG00000047346	FAM214A	59.4557	68.5969	115.007	54.7564	55.3505	28.3096	137.816	82.5767
ENSG00000047365	ARAP2	132.965	73.774	77.6121	90.1871	259.512	182.125	262.396	228.118
ENSG00000047410	TPR	872.377	1226.98	1047.76	1225.58	820.276	1112.57	1164.82	1010.53
ENSG00000047457	CP	0	0	0.705564	3.22097	0	1.88731	0	0
ENSG00000047578	KIAA0556	38.9165	27.1799	33.8671	16.1048	35.388	19.8167	38.1525	15.4831
ENSG00000047579	DTNBP1	58.3747	77.6569	99.4846	61.1984	107.071	70.774	112.122	118.704
ENSG00000047597	XK	28.1063	15.5314	70.5564	53.9512	23.592	26.4223	25.6946	3.09663
ENSG00000047617	ANO2	1.08101	0	0	0	0	0	0	0
ENSG00000047621	C12orf4	89.724	188.965	111.479	13.6891	62.6096	61.3374	119.129	177.54
ENSG00000047634	SCML1	64.8608	38.8284	52.2118	95.0185	67.1465	217.04	162.732	57.8037
ENSG00000047644	WWC3	94.0481	62.1255	400.76	111.929	186.921	255.73	622.12	100.124
ENSG00000047648	ARHGAP6	18.3772	16.8257	33.8671	0	5.44431	0	9.34348	4.12884
ENSG00000047662	FAM184B	0	0	0	0	0	0	2.33587	4.12884
ENSG00000047849	MAP4	566.451	330.042	507.301	368.801	714.112	252.899	889.966	613.132
ENSG00000047932	GOPC	147.018	292.508	146.052	177.958	101.627	163.252	175.19	323.081
ENSG00000047936	ROS1	0	0	0.705564	0	0	0	0	0
ENSG00000048028	USP28	64.8608	68.5969	94.5456	28.9887	56.2579	50.0136	111.343	47.4816
ENSG00000048052	HDAC9	42.1595	14.2371	40.9227	78.1085	166.959	175.519	166.625	56.7715
ENSG00000048140	TSPAN17	57.2937	42.7113	81.8455	77.3032	117.053	59.4501	95.7707	45.4172
ENSG00000048162	NOP16	165.395	107.425	140.407	191.648	141.552	93.4216	78.6409	151.735
ENSG00000048342	CC2D2A	32.4304	37.5342	48.6839	44.2883	16.3329	29.2532	12.458	6.19325
ENSG00000048392	RRM2B	238.904	113.897	34.5726	182.79	478.192	217.04	59.954	69.158
ENSG00000048405	ZNF800	330.79	192.848	222.253	127.228	378.38	187.787	281.083	240.505
ENSG00000048462	TNFRSF17	0	0	0	0	0	0	0	0
ENSG00000048471	SNX29	36.7544	20.7085	13.4057	16.9101	30.8511	24.535	15.5725	4.12884
ENSG00000048540	LMO3	1.08101	0	0	0	0	0	0	0
ENSG00000048544	MRPS10	590.233	781.746	699.214	665.935	1091.58	1195.61	845.585	1220.07
ENSG00000048545	GUCA1A	0	0	0	0	0	0	0	0
ENSG00000048649	RSF1	505.914	794.689	865.022	614.4	607.948	595.445	1203.75	743.19
ENSG00000048707	VPS13D	97.2911	377.93	174.98	92.6028	117.96	94.3653	170.518	154.831
ENSG00000048740	CELF2	326.466	944.825	0.705564	67.6403	275.845	48.1263	0	391.207
ENSG00000048828	FAM120A	2858.2	1898.71	2101.88	1691.01	4343.65	2277.03	2022.08	3345.39
ENSG00000048991	R3HDM1	115.668	196.731	90.3122	144.944	64.4244	104.745	58.3967	151.735
ENSG00000049089	COL9A2	0	6.47141	0	4.83145	0	0	3.11449	0
ENSG00000049130	KITLG	171.881	24.5913	56.4451	25.7677	30.8511	13.2111	7.78623	18.5798
ENSG00000049167	ERCC8	20.5392	49.1827	7.05564	22.5468	11.796	17.9294	13.2366	11.3543
ENSG00000049192	ADAMTS6	0	3.88284	2.82226	2.41573	2.72216	4.71826	0	3.09663
ENSG00000049239	H6PD	135.127	88.0111	148.168	90.1871	184.199	129.28	192.32	90.8344
ENSG00000049245	VAMP3	227.013	110.014	242.714	256.872	264.957	302.913	432.136	165.153
ENSG00000049246	PER3	7.56709	9.05997	22.5781	8.85766	39.0176	17.9294	42.8243	18.5798
ENSG00000049247	UTS2	15.1342	0	0	1.61048	5.44431	0	0	0
ENSG00000049249	TNFRSF9	9.72911	2.58856	1.41113	0	7.25908	0	17.1297	24.773
ENSG00000049283	EPN3	48.6456	10.3543	2.11669	27.3782	19.0551	8.49288	0	0
ENSG00000049323	LTBP1	185.934	58.2427	45.1561	89.3818	83.4795	69.8303	39.7098	39.2239
ENSG00000049449	RCN1	338.357	223.911	615.252	206.947	582.541	163.252	680.517	266.31
ENSG00000049540	ELN	0	1.29428	4.23339	0	0	0	0	0
ENSG00000049541	RFC2	52.9696	68.5969	19.7558	62.8089	14.5182	54.7319	12.458	52.6427
ENSG00000049618	ARID1B	75.6709	327.453	129.118	95.8238	91.6459	103.802	176.747	239.472
ENSG00000049656	CLPTM1L	402.137	266.622	379.594	914.755	249.531	493.53	230.472	218.828
ENSG00000049759	NEDD4L	235.661	135.9	260.353	318.876	167.866	130.224	174.412	138.316
ENSG00000049768	FOXP3	0	0	0	0	0	0	2.33587	0
ENSG00000049769	PPP1R3F	2.16203	0	2.11669	13.6891	13.6108	10.3802	10.9007	5.16104
ENSG00000049860	HEXB	407.542	270.505	218.725	552.396	228.661	354.814	211.786	169.282
ENSG00000049883	PTCD2	49.7266	11.6485	32.456	28.9887	52.6283	44.3517	15.5725	34.0629
ENSG00000050030	NEXMIF	0	0	0	0	0	0	0	0
ENSG00000050130	JKAMP	32.4304	36.2399	13.4057	95.8238	2.72216	61.3374	7.00761	24.773
ENSG00000050165	DKK3	1.08101	1.29428	0	0	0.907385	0	0	1.03221
ENSG00000050327	ARHGEF5	103.777	23.2971	329.498	71.6665	121.59	68.8867	330.136	66.0614
ENSG00000050344	NFE2L3	824.813	403.816	690.747	898.65	435.545	594.501	457.83	238.44
ENSG00000050393	MCUR1	32.4304	205.791	85.3733	92.6028	43.5545	111.351	116.793	95.9954
ENSG00000050405	LIMA1	1552.33	727.386	1071.05	553.201	2132.36	538.826	1157.03	945.503
ENSG00000050426	LETMD1	163.233	86.7168	56.4451	69.2508	139.737	74.5486	80.1982	106.318
ENSG00000050438	SLC4A8	12.9722	12.9428	12.7002	4.02621	11.796	0.943653	3.11449	11.3543
ENSG00000050555	LAMC3	0	0	0	0	0	0	0	0
ENSG00000050628	PTGER3	0	1.29428	0	0	0	0	0	0
ENSG00000050730	TNIP3	0	0	0	0	0	0	0	0
ENSG00000050748	MAPK9	88.643	95.7768	75.4954	86.1609	78.9425	56.6192	58.3967	48.5138
ENSG00000050767	COL23A1	0	0	0	0	0	0	0	0
ENSG00000050820	BCAR1	223.77	102.248	324.56	96.629	272.216	115.126	398.655	119.736
ENSG00000051009	FAM160A2	55.1316	85.4226	194.736	34.6254	29.0363	57.5628	110.564	47.4816
ENSG00000051108	HERPUD1	159.99	449.116	297.043	163.464	386.546	253.843	956.149	1079.69
ENSG00000051128	HOMER3	38.9165	5.17713	48.6839	51.5355	76.2204	60.3938	87.9844	8.25767
ENSG00000051180	RAD51	16.2152	28.4742	29.6337	61.1984	20.8699	117.957	27.2518	16.5153
ENSG00000051341	POLQ	65.9418	137.194	35.9838	65.2246	21.7772	79.2668	26.4732	62.9647
ENSG00000051382	PIK3CB	44.3215	129.428	93.1345	114.344	76.2204	120.788	139.374	120.768
ENSG00000051523	CYBA	142.694	98.3654	136.174	198.089	97.9976	155.703	142.488	34.0629
ENSG00000051596	THOC3	39.9975	7.76569	18.3447	69.2508	10.8886	15.0984	6.22899	1.03221
ENSG00000051620	HEBP2	458.349	876.228	794.465	476.703	859.294	820.978	1501.96	800.994
ENSG00000051825	MPHOSPH9	34.5924	128.134	39.5116	108.708	3.62954	96.2526	31.9236	41.2884
ENSG00000052126	PLEKHA5	137.289	455.587	222.958	124.812	176.033	168.914	260.06	453.14
ENSG00000052344	PRSS8	430.243	112.602	1504.97	219.026	642.429	266.11	2757.1	200.249
ENSG00000052723	SIKE1	74.5899	150.137	38.1005	115.15	78.0351	123.619	74.7478	141.413
ENSG00000052749	RRP12	58.3747	64.7141	151.696	41.0673	139.737	46.239	144.824	77.4157
ENSG00000052795	FNIP2	323.223	340.396	340.082	124.007	152.441	48.1263	334.029	126.962
ENSG00000052802	MSMO1	521.048	138.488	206.73	481.535	129.756	237.801	260.839	67.0936
ENSG00000052841	TTC17	331.871	353.339	465.672	231.104	254.975	315.18	396.319	381.917
ENSG00000052850	ALX4	0	0	0	0	0	0	0	0
ENSG00000053108	FSTL4	0	0	1.41113	4.83145	0	0	2.33587	0
ENSG00000053254	FOXN3	250.795	297.685	198.969	151.385	240.457	101.915	122.244	294.18
ENSG00000053328	METTL24	0	0	0	0	0	0	0	0
ENSG00000053371	AKR7A2	83.238	107.425	74.0842	94.2133	34.4806	53.7882	63.0685	36.1273
ENSG00000053372	MRTO4	159.99	311.922	272.348	184.4	99.8124	129.28	140.152	173.411
ENSG00000053438	NNAT	0	5.17713	0	0	0	0	0	5.16104
ENSG00000053501	USE1	32.4304	85.4226	45.8617	43.4831	28.1289	13.2111	35.8167	68.1258
ENSG00000053524	MCF2L2	1.08101	0	0	10.4681	0	12.2675	0	0
ENSG00000053702	NRIP2	0	0	0	0	0	0	0	0
ENSG00000053747	LAMA3	98.3721	76.3626	64.2063	130.449	192.366	291.589	205.557	197.152
ENSG00000053770	AP5M1	104.858	159.197	66.323	73.277	65.3317	64.1684	77.0837	103.221
ENSG00000053900	ANAPC4	73.5089	106.131	76.9065	66.8351	62.6096	84.9288	52.9464	75.3512
ENSG00000053918	KCNQ1	218.365	106.131	198.264	90.1871	267.679	87.7597	181.419	108.382
ENSG00000054116	TRAPPC3	460.511	195.436	202.497	252.041	559.857	291.589	183.755	301.405
ENSG00000054118	THRAP3	722.116	711.855	455.089	633.725	639.707	596.389	426.686	686.419
ENSG00000054148	PHPT1	709.144	376.636	318.915	339.007	374.75	418.038	215.679	275.6
ENSG00000054179	ENTPD2	14.0532	7.76569	23.9892	120.786	1.81477	66.9994	13.2366	6.19325
ENSG00000054219	LY75	38.9165	31.0628	111.479	49.925	102.535	129.28	136.259	61.9325
ENSG00000054267	ARID4B	397.813	508.653	535.523	376.853	499.062	524.671	1004.42	431.463
ENSG00000054277	OPN3	277.82	31.0628	100.19	74.0823	280.382	72.6613	105.114	38.1917
ENSG00000054282	SDCCAG8	228.094	239.442	248.359	89.3818	225.032	163.252	271.739	228.118
ENSG00000054356	PTPRN	0	0	0	0	0	0	0	0
ENSG00000054392	HHAT	10.8101	0	4.23339	0.805242	2.72216	0	2.33587	1.03221
ENSG00000054523	KIF1B	151.342	260.151	321.737	290.692	431.008	358.588	711.662	390.175
ENSG00000054598	FOXC1	99.4532	47.8884	206.73	132.865	869.275	586.008	615.891	71.2224
ENSG00000054611	TBC1D22A	139.451	116.485	179.213	104.681	137.923	112.295	165.847	149.67
ENSG00000054654	SYNE2	150.261	662.672	362.66	978.369	96.1828	2214.75	872.058	1012.6
ENSG00000054690	PLEKHH1	85.4	183.788	42.3339	47.5093	61.7022	38.6898	35.8167	46.4494
ENSG00000054793	ATP9A	458.349	152.725	622.308	734.381	957.292	801.161	1457.58	157.928
ENSG00000054796	SPO11	0	0	0	0	0	0	0	0
ENSG00000054803	CBLN4	0	0	0	0	0	0	0	0
ENSG00000054938	CHRDL2	0	0	0	0	0	0	0	0
ENSG00000054965	FAM168A	12.9722	28.4742	19.7558	40.2621	8.16647	26.4223	17.9083	12.3865
ENSG00000054967	RELT	25.9443	6.47141	33.8671	4.83145	22.6846	6.60557	58.3967	6.19325
ENSG00000054983	GALC	28.1063	37.5342	55.034	58.7827	20.8699	44.3517	67.7402	40.2561
ENSG00000055044	NOP58	337.276	790.806	532.701	582.995	499.062	624.698	455.495	800.994
ENSG00000055070	SZRD1	144.856	169.551	247.653	136.086	145.182	218.927	309.113	262.181
ENSG00000055118	KCNH2	34.5924	33.6513	55.034	24.9625	19.0551	8.49288	114.458	24.773
ENSG00000055130	CUL1	275.658	133.311	179.919	129.644	286.734	127.393	239.816	175.476
ENSG00000055147	FAM114A2	34.5924	44.0056	52.9173	24.1573	54.4431	60.3938	81.7554	27.8696
ENSG00000055163	CYFIP2	81.0759	20.7085	120.651	8.05242	63.517	3.77461	87.9844	0
ENSG00000055208	TAB2	55.1316	169.551	103.012	152.191	97.0902	191.562	73.9692	220.893
ENSG00000055211	GINM1	61.6177	267.916	115.713	195.674	78.0351	181.181	155.725	154.831
ENSG00000055332	EIF2AK2	694.01	414.17	626.541	818.126	1669.59	2110.95	1311.2	912.473
ENSG00000055483	USP36	371.868	309.333	476.256	186.816	349.343	226.477	390.09	345.79
ENSG00000055609	KMT2C	431.324	555.247	716.853	303.576	558.042	337.828	971.722	546.038
ENSG00000055732	MCOLN3	4.32405	22.0028	2.11669	0	0	0	0.778623	5.16104
ENSG00000055813	CCDC85A	0	0	0	0	0	0	0	0
ENSG00000055917	PUM2	281.063	269.211	231.425	323.707	272.216	312.349	228.915	244.634
ENSG00000055950	MRPL43	136.208	64.7141	149.58	233.52	114.331	158.534	155.725	89.8022
ENSG00000055955	ITIH4	2.16203	0	0	0	0.907385	0	0	0
ENSG00000055957	ITIH1	0	0	0	0	0	0	0	0
ENSG00000056050	HPF1	37.8354	12.9428	35.2782	53.9512	6.3517	49.07	38.9312	17.5476
ENSG00000056097	ZFR	444.296	424.524	302.687	890.597	642.429	1062.55	327.8	617.261
ENSG00000056277	ZNF280C	17.2962	42.7113	20.4614	24.1573	26.3142	25.4786	41.267	39.2239
ENSG00000056291	NPFFR2	0	0	0	0	0	0.943653	0	0
ENSG00000056487	PHF21B	0	0	0	0	0	0	0	0
ENSG00000056558	TRAF1	3.24304	18.1199	4.93895	8.85766	3.62954	1.88731	11.6793	6.19325
ENSG00000056586	RC3H2	178.367	183.788	120.651	156.217	317.585	214.209	145.603	182.701
ENSG00000056736	IL17RB	2.16203	22.0028	15.5224	43.4831	0	15.0984	11.6793	18.5798
ENSG00000056972	TRAF3IP2	59.4557	56.9484	39.5116	57.9774	110.701	64.1684	64.6257	37.1595
ENSG00000056998	GYG2	9.72911	10.3543	25.4003	0	9.98124	0	6.22899	1.03221
ENSG00000057019	DCBLD2	477.808	73.774	829.744	855.167	266.771	858.724	712.44	29.9341
ENSG00000057149	SERPINB3	0	0	0	0	0	0	0	0
ENSG00000057252	SOAT1	1.08101	25.8856	28.2226	45.0935	7.25908	48.1263	44.3815	41.2884
ENSG00000057294	PKP2	170.8	419.347	112.185	57.1722	180.57	46.239	109.007	353.015
ENSG00000057468	MSH4	0	0	0	0	0	0	0	0
ENSG00000057593	F7	2.16203	0	59.973	0	0.907385	0.943653	63.0685	0
ENSG00000057608	GDI2	732.926	429.701	438.155	689.287	898.311	524.671	625.234	590.423
ENSG00000057657	PRDM1	144.856	15.5314	34.5726	51.5355	406.509	202.885	538.029	493.396
ENSG00000057663	ATG5	63.7797	90.5997	77.6121	91.7976	56.2579	103.802	73.1906	104.253
ENSG00000057704	TMCC3	46.4835	86.7168	67.7342	12.8839	120.682	29.2532	230.472	118.704
ENSG00000057757	PITHD1	77.8329	49.1827	77.6121	56.3669	68.9613	62.2811	50.6105	77.4157
ENSG00000057935	MTA3	137.289	71.1855	69.1453	106.292	175.125	69.8303	34.2594	84.6411
ENSG00000058056	USP13	10.8101	124.251	39.5116	140.917	9.07385	47.1826	9.34348	50.5782
ENSG00000058063	ATP11B	153.504	201.908	84.6677	204.531	148.811	283.096	164.289	349.919
ENSG00000058085	LAMC2	1061.55	291.213	948.984	566.085	1167.8	603.938	1826.65	289.018
ENSG00000058091	CDK14	0	2.58856	0.705564	1.61048	0	1.88731	0	0
ENSG00000058262	SEC61A1	219.446	264.033	316.093	227.883	229.568	288.758	433.693	297.276
ENSG00000058272	PPP1R12A	476.727	653.612	439.567	535.486	758.574	846.457	751.371	774.157
ENSG00000058335	RASGRF1	11.8911	0	9.8779	1.61048	8.16647	0	7.00761	0
ENSG00000058404	CAMK2B	1.08101	5.17713	10.5835	11.2734	0	0.943653	11.6793	0
ENSG00000058453	CROCC	12.9722	9.05997	27.517	16.1048	9.07385	13.2111	15.5725	20.6442
ENSG00000058600	POLR3E	58.3747	67.3026	55.034	60.3931	81.6647	39.6334	60.7326	63.9969
ENSG00000058668	ATP2B4	155.666	69.8912	13.4057	376.048	285.826	255.73	66.9616	42.3206
ENSG00000058673	ZC3H11A	576.18	462.058	485.428	585.411	558.042	603.938	594.868	431.463
ENSG00000058729	RIOK2	45.4025	69.8912	68.4397	76.498	86.2016	62.2811	78.6409	67.0936
ENSG00000058799	YIPF1	65.9418	67.3026	21.1669	40.2621	56.2579	79.2668	16.3511	93.931
ENSG00000058804	NDC1	164.314	161.785	43.0394	187.621	107.071	143.435	22.5801	102.189
ENSG00000058866	DGKG	0	0	19.7558	0	6.3517	5.66192	26.4732	0
ENSG00000059122	FLYWCH1	17.2962	14.2371	30.3393	27.3782	63.517	36.8025	73.9692	38.1917
ENSG00000059145	UNKL	29.1873	34.9456	26.8114	90.1871	45.3693	53.7882	14.7938	24.773
ENSG00000059377	TBXAS1	0	2.58856	2.11669	0	0	0	0	0
ENSG00000059378	PARP12	89.724	88.0111	93.84	41.0673	456.415	334.997	302.106	272.503
ENSG00000059573	ALDH18A1	332.952	183.788	282.931	304.381	154.256	158.534	102.778	147.606
ENSG00000059588	TARBP1	94.0481	170.845	79.0232	128.839	48.9988	100.971	24.1373	92.8988
ENSG00000059691	GATB	43.2405	20.7085	26.8114	23.352	23.592	11.3238	11.6793	18.5798
ENSG00000059728	MXD1	115.668	68.5969	141.113	132.06	763.111	284.04	1178.84	532.62
ENSG00000059758	CDK17	35.6734	20.7085	43.745	52.3407	46.2767	84.9288	100.442	34.0629
ENSG00000059769	DNAJC25	89.724	111.308	107.951	99.85	75.313	69.8303	115.236	60.9003
ENSG00000059804	SLC2A3	968.587	49.1827	745.076	276.198	431.008	154.759	266.289	69.158
ENSG00000059915	PSD	3.24304	9.05997	0.705564	1.61048	0.907385	2.83096	0	0
ENSG00000060069	CTDP1	55.1316	45.2998	102.307	34.6254	60.7948	34.9152	94.992	30.9663
ENSG00000060138	YBX3	1262.62	2431.95	534.818	826.983	1526.22	749.26	397.876	2210.99
ENSG00000060140	STYK1	5.40506	77.6569	16.228	4.02621	4.53693	15.0984	1.55725	87.7378
ENSG00000060237	WNK1	512.4	908.586	653.352	407.452	618.837	575.628	849.478	1297.49
ENSG00000060339	CCAR1	735.089	1038.01	779.648	608.763	808.48	811.542	696.089	968.212
ENSG00000060491	OGFR	123.235	59.5369	565.157	152.191	440.082	421.813	981.065	166.186
ENSG00000060558	GNA15	10.8101	38.8284	0	9.6629	39.0176	16.0421	0	31.9985
ENSG00000060566	CREB3L3	4.32405	0	30.3393	0	9.07385	0.943653	35.8167	10.3221
ENSG00000060642	PIGV	20.5392	16.8257	8.46677	22.5468	19.9625	7.54922	4.67174	12.3865
ENSG00000060656	PTPRU	129.722	0	21.1669	10.4681	93.4607	16.0421	24.9159	0
ENSG00000060688	SNRNP40	36.7544	25.8856	10.5835	23.352	12.7034	9.43653	7.00761	14.4509
ENSG00000060709	RIMBP2	45.4025	0	0	2.41573	21.7772	0	3.89312	5.16104
ENSG00000060718	COL11A1	0	0	0	0	0	0	0	0
ENSG00000060749	QSER1	256.2	173.434	213.786	165.88	290.363	218.927	266.289	228.118
ENSG00000060762	MPC1	29.1873	120.368	91.7234	28.9887	51.721	57.5628	228.915	150.702
ENSG00000060971	ACAA1	218.365	86.7168	142.524	67.6403	156.978	59.4501	142.488	87.7378
ENSG00000060982	BCAT1	8.6481	0	0.705564	3.22097	14.5182	0.943653	0	6.19325
ENSG00000061273	HDAC7	260.524	129.428	416.283	150.58	342.992	123.619	334.808	120.768
ENSG00000061337	LZTS1	0	0	0	0	3.62954	0	0	0
ENSG00000061455	PRDM6	0	0	0.705564	0	0	0	0.778623	0
ENSG00000061492	WNT8A	0	0	0	0	0	0	0	0
ENSG00000061656	SPAG4	16.2152	5.17713	13.4057	19.3258	0	4.71826	7.00761	1.03221
ENSG00000061676	NCKAP1	214.04	295.096	180.624	376.853	483.636	481.263	240.595	504.75
ENSG00000061794	MRPS35	454.025	1766.69	584.207	301.16	557.135	285.927	580.853	1478.12
ENSG00000061918	GUCY1B1	0	0	0	0	0	0	0	0
ENSG00000061936	SFSWAP	263.767	348.162	294.22	405.842	269.493	546.375	360.503	344.758
ENSG00000061938	TNK2	329.709	126.84	76.9065	240.767	401.972	278.378	112.122	319.985
ENSG00000061987	MON2	48.6456	94.4825	45.8617	60.3931	35.388	53.7882	40.4884	51.6104
ENSG00000062038	CDH3	286.468	76.3626	182.741	239.157	302.159	177.407	89.5417	54.7071
ENSG00000062096	ARSF	0	0	0	0	0	0	0	0
ENSG00000062194	GPBP1	463.754	531.95	452.972	542.733	633.355	624.698	566.059	460.365
ENSG00000062282	DGAT2	65.9418	77.6569	75.4954	135.281	17.2403	27.3659	31.9236	15.4831
ENSG00000062370	ZNF112	4.32405	1.29428	13.4057	0.805242	4.53693	0.943653	10.1221	0
ENSG00000062485	CS	230.256	104.837	212.375	354.306	153.348	184.956	225.801	159.992
ENSG00000062524	LTK	1.08101	6.47141	9.8779	0	3.62954	0	1.55725	4.12884
ENSG00000062582	MRPS24	0	2.58856	4.93895	4.83145	0	0.943653	0	6.19325
ENSG00000062598	ELMO2	49.7266	36.2399	101.601	24.9625	51.721	33.0279	127.694	29.9341
ENSG00000062650	WAPL	418.352	311.922	252.592	442.883	459.137	416.151	275.633	412.884
ENSG00000062716	VMP1	430.243	390.873	309.743	527.433	375.658	640.74	506.105	400.497
ENSG00000062725	APPBP2	82.157	144.96	79.7288	104.681	107.071	122.675	87.2058	163.089
ENSG00000062822	POLD1	22.7013	11.6485	16.228	24.9625	0.907385	4.71826	0.778623	5.16104
ENSG00000063015	SEZ6	0	0	0	0	0	0	0	0
ENSG00000063046	EIF4B	826.975	504.77	319.621	763.369	437.36	399.165	193.099	324.114
ENSG00000063127	SLC6A16	0	0	0	1.61048	0	0	0	0
ENSG00000063169	BICRA	11.8911	10.3543	14.8168	9.6629	4.53693	16.9858	16.3511	14.4509
ENSG00000063176	SPHK2	149.18	80.2454	213.786	45.0935	35.388	20.7604	138.595	47.4816
ENSG00000063177	RPL18	4623.49	2983.32	3594.14	4480.37	5183.89	4552.18	2915.17	3650.92
ENSG00000063180	CA11	23.7823	14.2371	55.7396	52.3407	80.7573	73.6049	42.8243	15.4831
ENSG00000063241	ISOC2	17.2962	9.05997	31.0448	33.8202	9.98124	13.2111	14.7938	18.5798
ENSG00000063244	U2AF2	488.618	220.028	728.848	355.112	405.601	354.814	567.616	424.238
ENSG00000063245	EPN1	347.005	191.554	430.394	227.078	441.897	333.109	601.876	347.854
ENSG00000063322	MED29	43.2405	58.2427	178.508	57.1722	78.0351	91.5343	261.617	104.253
ENSG00000063438	AHRR	7.56709	0	1.41113	51.5355	7.25908	16.0421	0	7.22546
ENSG00000063515	GSC2	0	0	0	0	0	0	0	0
ENSG00000063587	ZNF275	111.344	68.5969	160.163	51.5355	172.403	62.2811	215.679	122.833
ENSG00000063601	MTMR1	58.3747	40.1227	90.3122	92.6028	34.4806	40.5771	51.3891	49.546
ENSG00000063660	GPC1	113.506	0	164.396	148.165	34.4806	96.2526	52.9464	0
ENSG00000063761	ADCK1	27.0253	40.1227	36.6893	4.83145	9.07385	3.77461	11.6793	20.6442
ENSG00000063854	HAGH	83.238	71.1855	145.346	120.786	106.164	92.478	119.129	51.6104
ENSG00000063978	RNF4	39.9975	32.357	45.1561	60.3931	36.2954	64.1684	77.8623	29.9341
ENSG00000064012	CASP8	47.5646	161.785	83.2566	82.1347	147.904	267.997	476.517	311.727
ENSG00000064042	LIMCH1	45.4025	5.17713	40.2172	57.1722	4.53693	34.9152	7.78623	15.4831
ENSG00000064102	INTS13	132.965	415.464	80.4343	157.022	170.588	138.717	58.3967	460.365
ENSG00000064115	TM7SF3	225.932	587.604	85.3733	104.681	138.83	111.351	69.2975	287.986
ENSG00000064195		25.9443	0	2.11669	0.805242	20.8699	2.83096	3.11449	4.12884
ENSG00000064199	SPA17	33.5114	71.1855	28.2226	18.5206	30.8511	16.9858	37.3739	43.3528
ENSG00000064201	TSPAN32	0	0	0.705564	0	0	0	0	0
ENSG00000064205	CCN5	0	0	0.705564	1.61048	0	0	0	0
ENSG00000064218	DMRT3	0	0	0	0	0	0	3.89312	0
ENSG00000064225	ST3GAL6	0	14.2371	0	0	0.907385	0	0	4.12884
ENSG00000064270	ATP2C2	48.6456	147.548	776.121	75.6927	29.9437	58.5065	546.593	208.506
ENSG00000064300	NGFR	0	0	0	0	0	4.71826	5.45036	0
ENSG00000064309	CDON	0	16.8257	0	12.8839	0	0	0	4.12884
ENSG00000064313	TAF2	151.342	247.208	82.551	194.869	191.458	320.842	107.45	240.505
ENSG00000064393	HIPK2	151.342	172.139	47.2728	38.6516	129.756	52.8446	102	316.888
ENSG00000064419	TNPO3	254.038	209.674	232.836	234.325	250.438	259.505	218.014	229.15
ENSG00000064489	BORCS8-MEF2B	0	1.29428	0.705564	0	0.907385	0	0	3.09663
ENSG00000064490	RFXANK	50.8076	84.1283	38.806	30.5992	64.4244	25.4786	33.4808	123.865
ENSG00000064545	TMEM161A	174.043	196.731	166.513	133.67	115.238	88.7034	63.0685	184.765
ENSG00000064547	LPAR2	42.1595	68.5969	91.7234	40.2621	10.8886	31.1405	65.4043	66.0614
ENSG00000064601	CTSA	289.711	164.374	482.606	286.666	398.342	232.139	916.44	185.798
ENSG00000064607	SUGP2	148.099	393.462	116.418	160.243	97.9976	140.604	67.7402	297.276
ENSG00000064651	SLC12A2	3518.7	2575.62	3287.22	3602.65	736.797	600.163	2003.4	475.848
ENSG00000064652	SNX24	19.4582	0	6.35008	12.0786	20.8699	20.7604	17.1297	3.09663
ENSG00000064655	EYA2	0	0	0	0	0	0	0	0
ENSG00000064666	CNN2	1061.55	669.143	721.087	580.579	1002.66	490.7	717.112	481.009
ENSG00000064687	ABCA7	35.6734	14.2371	17.6391	60.3931	27.2216	49.07	17.9083	5.16104
ENSG00000064692	SNCAIP	4.32405	5.17713	0	0	0	0	0	0
ENSG00000064703	DDX20	115.668	112.602	49.3895	66.0298	69.8687	68.8867	26.4732	115.607
ENSG00000064726	BTBD1	36.7544	12.9428	31.7504	33.0149	50.8136	34.9152	53.725	40.2561
ENSG00000064763	FAR2	47.5646	134.605	40.9227	33.0149	100.72	41.5207	71.6333	166.186
ENSG00000064787	BCAS1	91.8861	363.693	47.2728	40.2621	80.7573	11.3238	22.5801	611.068
ENSG00000064835	POU1F1	0	0	0	0	0	0	0	0
ENSG00000064886	CHI3L2	0	0	0	0	0	0	0	0
ENSG00000064932	SBNO2	62.6987	18.1199	95.2512	74.0823	274.03	264.223	289.648	205.41
ENSG00000064933	PMS1	52.9696	112.602	38.1005	126.423	33.5733	84.9288	36.5953	69.158
ENSG00000064961	HMG20B	134.046	225.205	75.4954	182.79	87.109	157.59	56.8395	138.316
ENSG00000064989	CALCRL	0	0	0	0.805242	0	1.88731	0	0
ENSG00000064995	TAF11	125.397	179.905	100.19	124.812	69.8687	130.224	105.114	165.153
ENSG00000064999	ANKS1A	150.261	134.605	108.657	111.123	147.904	106.633	158.061	218.828
ENSG00000065000	AP3D1	686.443	832.223	604.669	486.366	1222.25	554.868	1188.18	1279.94
ENSG00000065029	ZNF76	27.0253	49.1827	21.1669	12.8839	37.2028	12.2675	18.687	46.4494
ENSG00000065054	SLC9A3R2	85.4	23.2971	9.17234	41.8726	63.517	94.3653	11.6793	35.0951
ENSG00000065057	NTHL1	98.3721	296.39	59.2674	141.723	51.721	89.647	12.458	71.2224
ENSG00000065060	UHRF1BP1	60.5367	40.1227	57.1507	57.1722	97.9976	100.971	69.2975	114.575
ENSG00000065135	GNAI3	367.544	381.813	155.93	467.846	494.525	435.024	290.426	549.135
ENSG00000065150	IPO5	722.116	678.203	234.953	599.1	352.973	319.898	151.053	327.21
ENSG00000065154	OAT	75.6709	25.8856	104.424	236.741	19.9625	62.2811	65.4043	18.5798
ENSG00000065183	WDR3	284.306	203.202	195.441	367.996	225.032	271.772	118.351	191.991
ENSG00000065243	PKN2	252.957	673.026	127.002	507.302	321.214	552.981	232.03	763.835
ENSG00000065268	WDR18	317.818	120.368	317.504	232.715	328.473	153.815	191.541	196.12
ENSG00000065308	TRAM2	65.9418	76.3626	160.163	29.7939	48.0914	27.3659	122.244	92.8988
ENSG00000065320	NTN1	0	6.47141	0	2.41573	0	0	0	5.16104
ENSG00000065325	GLP2R	3.24304	0	0	0	0	0	0	0
ENSG00000065328	MCM10	83.238	66.0083	39.5116	155.412	14.5182	131.168	19.4656	17.5476
ENSG00000065357	DGKA	211.878	186.377	24.6947	85.3556	270.401	30.1969	7.00761	78.4479
ENSG00000065361	ERBB3	837.785	723.503	877.722	578.164	953.662	691.698	1108.76	738.029
ENSG00000065371	ROPN1	0	0	0	0	0	0	0	0
ENSG00000065413	ANKRD44	0	25.8856	2.11669	0.805242	0	7.54922	4.67174	0
ENSG00000065427	KARS	712.387	975.888	969.445	421.141	1726.75	699.247	1700.51	1738.24
ENSG00000065457	ADAT1	110.263	234.265	257.531	65.2246	99.8124	46.239	144.824	106.318
ENSG00000065485	PDIA5	109.182	179.905	61.3841	201.31	81.6647	271.772	51.3891	159.992
ENSG00000065491	TBC1D22B	57.2937	76.3626	21.8725	28.1835	64.4244	52.8446	31.9236	59.8681
ENSG00000065518	NDUFB4	337.276	261.445	237.07	605.542	289.456	456.728	316.121	330.307
ENSG00000065526	SPEN	317.818	446.527	524.94	335.786	493.618	420.869	583.189	662.678
ENSG00000065534	MYLK	47.5646	38.8284	157.341	31.4044	4.53693	7.54922	73.9692	8.25767
ENSG00000065548	ZC3H15	1148.04	1150.62	1435.82	955.017	1338.39	1396.61	1439.67	1516.31
ENSG00000065559	MAP2K4	69.1848	68.5969	110.774	36.2359	76.2204	33.0279	158.839	73.2868
ENSG00000065600	TMEM206	58.3747	18.1199	19.7558	33.0149	33.5733	23.5913	13.2366	20.6442
ENSG00000065609	SNAP91	0	0	0	0	0	0	0	0
ENSG00000065613	SLK	661.58	557.835	539.051	1289.19	975.439	1490.97	1049.58	727.707
ENSG00000065615	CYB5R4	18.3772	71.1855	40.2172	27.3782	30.8511	25.4786	93.4348	72.2546
ENSG00000065618	COL17A1	1590.17	296.39	666.758	606.347	2022.56	818.147	746.7	223.989
ENSG00000065621	GSTO2	149.18	151.431	93.1345	264.925	151.533	247.237	92.6562	97.0276
ENSG00000065665	SEC61A2	10.8101	2.58856	13.4057	10.4681	9.07385	10.3802	2.33587	3.09663
ENSG00000065675	PRKCQ	1.08101	0	3.52782	4.02621	1.81477	1.88731	3.11449	0
ENSG00000065717	TLE2	3.24304	14.2371	26.1059	9.6629	9.07385	32.0842	3.11449	13.4187
ENSG00000065802	ASB1	64.8608	31.0628	51.5062	64.4193	76.2204	59.4501	59.954	78.4479
ENSG00000065809	FAM107B	462.673	223.911	234.247	446.909	1048.94	1019.15	527.907	552.232
ENSG00000065833	ME1	222.689	146.254	318.915	288.277	261.327	163.252	488.197	327.21
ENSG00000065882	TBC1D1	35.6734	103.543	64.9119	166.685	65.3317	142.492	64.6257	127.994
ENSG00000065883	CDK13	199.987	260.151	355.604	145.749	411.046	168.914	441.479	290.051
ENSG00000065911	MTHFD2	283.225	475.001	464.967	713.444	811.202	1278.65	763.051	1349.1
ENSG00000065923	SLC9A7	42.1595	18.1199	7.76121	10.4681	28.1289	29.2532	6.22899	25.8052
ENSG00000065970	FOXJ2	122.154	122.957	62.0897	49.925	155.163	77.3795	106.671	139.348
ENSG00000065978	YBX1	3324.11	5186.19	1617.86	4068.08	4341.84	3421.69	1296.41	5325.17
ENSG00000065989		36.7544	29.7685	32.456	45.0935	58.98	57.5628	20.2442	15.4831
ENSG00000066027	PPP2R5A	171.881	210.968	297.043	222.247	333.918	269.885	436.808	227.086
ENSG00000066032	CTNNA2	0	3.88284	13.4057	2.41573	0	0.943653	4.67174	0
ENSG00000066044	ELAVL1	210.797	230.382	198.969	247.209	230.476	225.533	152.61	221.925
ENSG00000066056	TIE1	0	0	0	0	0	0	0	0
ENSG00000066084	DIP2B	129.722	147.548	86.7844	111.929	156.978	151.928	128.473	119.736
ENSG00000066117	SMARCD1	183.772	104.837	134.057	120.786	214.143	102.858	134.702	152.767
ENSG00000066135	KDM4A	264.848	341.69	146.757	157.827	264.049	201.942	218.014	584.23
ENSG00000066136	NFYC	75.6709	185.082	45.8617	65.2246	74.4056	76.4359	27.2518	223.989
ENSG00000066185	ZMYND12	0	0	0	0	0	0.943653	0	6.19325
ENSG00000066230	SLC9A3	0	0	0	0	0	0	0	0
ENSG00000066248	NGEF	67.0228	45.2998	47.9784	67.6403	107.979	73.6049	63.0685	54.7071
ENSG00000066279	ASPM	421.595	720.915	469.2	772.227	178.755	680.374	217.236	307.598
ENSG00000066294	CD84	0	0	0.705564	0	0	0	0	0
ENSG00000066322	ELOVL1	187.015	62.1255	71.262	173.932	108.886	197.223	73.9692	76.3835
ENSG00000066336	SPI1	0	0	0	0	0	0	0	0
ENSG00000066379	ZNRD1	179.448	50.477	86.0788	222.247	274.938	221.758	102	92.8988
ENSG00000066382	MPPED2	0	0	0	0	0	0	0	0
ENSG00000066405	CLDN18	0	1133.79	0.705564	0	0	0	0	177.54
ENSG00000066422	ZBTB11	92.9671	150.137	155.93	140.917	152.441	150.041	218.793	213.667
ENSG00000066427	ATXN3	62.6987	276.976	93.1345	142.528	71.6834	136.83	157.282	206.442
ENSG00000066455	GOLGA5	79.9949	141.077	99.4846	99.85	110.701	167.97	152.61	175.476
ENSG00000066468	FGFR2	4.32405	16.8257	2.11669	31.4044	3.62954	18.8731	3.89312	21.6764
ENSG00000066557	LRRC40	15.1342	54.3598	8.46677	36.2359	9.98124	21.704	10.1221	24.773
ENSG00000066583	ISOC1	37.8354	59.5369	21.8725	90.1871	44.4619	100.971	10.9007	44.385
ENSG00000066629	EML1	0	0	9.17234	0	1.81477	0	4.67174	0
ENSG00000066651	TRMT11	48.6456	148.842	57.1507	116.76	53.5357	92.478	84.0913	136.252
ENSG00000066654	THUMPD1	287.549	155.314	220.136	216.61	258.605	281.209	269.404	259.084
ENSG00000066697	MSANTD3	84.319	46.5941	48.6839	58.7827	46.2767	43.408	24.1373	33.0307
ENSG00000066735	KIF26A	4.32405	1.29428	2.82226	8.85766	6.3517	22.6477	0.778623	0
ENSG00000066739	ATG2B	33.5114	104.837	70.5564	52.3407	50.8136	64.1684	97.3279	112.511
ENSG00000066777	ARFGEF1	251.876	579.838	270.231	337.396	188.736	349.152	326.243	367.466
ENSG00000066813	ACSM2B	0	0	0	0	0	0	0	0
ENSG00000066827	ZFAT	16.2152	33.6513	27.517	30.5992	48.0914	25.4786	39.7098	27.8696
ENSG00000066855	MTFR1	94.0481	130.722	57.8563	386.516	82.5721	277.434	42.0457	109.414
ENSG00000066923	STAG3	0	1.29428	0	0	0	0	0	0
ENSG00000066926	FECH	14.0532	24.5913	12.7002	32.2097	19.0551	9.43653	24.1373	12.3865
ENSG00000066933	MYO9A	88.643	143.665	184.152	169.906	103.442	198.167	256.946	84.6411
ENSG00000067048	DDX3Y	235.661	0	0	0	252.253	0	0	0
ENSG00000067057	PFKP	170.8	51.7713	124.179	265.73	342.084	284.983	255.388	155.864
ENSG00000067064	IDI1	182.691	93.1883	50.8006	350.28	44.4619	188.731	116.793	35.0951
ENSG00000067066	SP100	147.018	234.265	288.576	210.973	961.828	1133.33	1283.17	1085.88
ENSG00000067082	KLF6	387.002	331.336	351.371	1135.39	1330.23	1315.45	1176.5	698.805
ENSG00000067113	PLPP1	18.3772	27.1799	48.6839	24.1573	9.07385	20.7604	35.8167	22.7086
ENSG00000067141	NEO1	41.0785	68.5969	234.247	107.902	178.755	208.547	293.541	120.768
ENSG00000067167	TRAM1	322.142	669.143	231.425	663.519	360.232	537.882	344.151	557.393
ENSG00000067177	PHKA1	65.9418	1.29428	20.4614	32.2097	68.0539	44.3517	56.8395	1.03221
ENSG00000067182	TNFRSF1A	95.1291	176.022	142.524	99.85	342.084	223.646	280.304	536.749
ENSG00000067191	CACNB1	1.08101	2.58856	2.82226	0.805242	0.907385	17.9294	0.778623	5.16104
ENSG00000067208	EVI5	324.304	389.579	119.946	167.49	325.751	179.294	110.564	289.018
ENSG00000067221	STOML1	20.5392	45.2998	127.707	23.352	15.4256	17.9294	126.916	60.9003
ENSG00000067225	PKM	1012.91	912.468	1821.77	1082.25	1256.73	1148.43	3082.57	1131.3
ENSG00000067248	DHX29	233.499	223.911	239.892	143.333	244.994	132.111	313.007	242.569
ENSG00000067334	DNTTIP2	309.17	434.879	210.964	462.209	284.012	376.518	175.969	504.75
ENSG00000067365	METTL22	34.5924	20.7085	34.5726	10.4681	39.925	35.8588	28.8091	15.4831
ENSG00000067369	TP53BP1	176.205	367.576	377.477	157.022	113.423	118.9	464.059	205.41
ENSG00000067445	TRO	0	0	0	0	0	0	0	0
ENSG00000067533	RRP15	262.686	247.208	270.937	183.595	110.701	139.661	174.412	126.962
ENSG00000067560	RHOA	1430.18	1677.39	1464.75	1451.85	1339.3	1086.14	1072.16	1295.42
ENSG00000067596	DHX8	72.4278	100.954	153.107	44.2883	58.98	71.7176	108.229	80.5123
ENSG00000067606	PRKCZ	59.4557	56.9484	155.93	78.1085	132.478	55.6755	209.45	84.6411
ENSG00000067646	ZFY	19.4582	0	0	0	39.925	0	0	0
ENSG00000067704	IARS2	384.84	239.442	467.789	396.984	464.581	356.701	488.197	197.152
ENSG00000067715	SYT1	822.651	125.545	42.3339	78.9137	295.808	49.07	41.267	122.833
ENSG00000067798	NAV3	220.527	41.417	99.4846	7.24718	227.754	15.0984	125.358	21.6764
ENSG00000067829	IDH3G	104.858	284.742	167.219	115.15	127.034	86.8161	227.358	182.701
ENSG00000067836	ROGDI	22.7013	6.47141	16.9335	12.0786	25.4068	7.54922	17.1297	47.4816
ENSG00000067840	PDZD4	0	0	1.41113	0	0	0	7.00761	0
ENSG00000067842	ATP2B3	0	1.29428	0	0	0	0	0	0
ENSG00000067900	ROCK1	378.354	588.898	292.809	367.19	439.175	422.757	285.755	600.746
ENSG00000067955	CBFB	140.532	205.791	194.736	157.022	183.292	153.815	239.037	270.439
ENSG00000067992	PDK3	12.9722	31.0628	34.5726	129.644	7.25908	128.337	55.2822	22.7086
ENSG00000068001	HYAL2	55.1316	19.4142	74.0842	84.5504	30.8511	37.7461	42.8243	21.6764
ENSG00000068024	HDAC4	18.3772	29.7685	24.6947	91.7976	57.1653	138.717	70.8547	118.704
ENSG00000068028	RASSF1	35.6734	34.9456	22.5781	12.8839	52.6283	16.9858	49.8319	31.9985
ENSG00000068078	FGFR3	56.2127	19.4142	205.319	36.2359	21.7772	9.43653	42.0457	1.03221
ENSG00000068079	IFI35	6.48608	10.3543	39.5116	19.3258	138.83	105.689	383.861	109.414
ENSG00000068097	HEATR6	36.7544	37.5342	55.7396	48.3145	17.2403	60.3938	44.3815	34.0629
ENSG00000068120	COASY	147.018	102.248	196.147	107.902	225.939	150.984	170.518	313.791
ENSG00000068137	PLEKHH3	41.0785	38.8284	50.0951	37.8464	39.925	61.3374	49.0533	51.6104
ENSG00000068305	MEF2A	86.481	91.894	98.0734	109.513	143.367	137.773	220.35	148.638
ENSG00000068308	OTUD5	162.152	104.837	316.798	130.449	185.107	160.421	429.021	180.637
ENSG00000068323	TFE3	39.9975	20.7085	110.774	29.7939	99.8124	86.8161	132.366	25.8052
ENSG00000068354	TBC1D25	56.2127	16.8257	104.424	52.3407	35.388	47.1826	91.0989	25.8052
ENSG00000068366	ACSL4	64.8608	199.319	75.4954	247.209	35.388	107.576	48.2746	125.929
ENSG00000068383	INPP5A	69.1848	19.4142	45.1561	64.4193	76.2204	56.6192	31.9236	39.2239
ENSG00000068394	GPKOW	24.8633	24.5913	64.2063	67.6403	16.3329	39.6334	67.7402	15.4831
ENSG00000068400	GRIPAP1	135.127	159.197	339.376	134.475	290.363	208.547	789.524	264.245
ENSG00000068438	FTSJ1	45.4025	71.1855	105.129	100.655	54.4431	83.9851	105.893	67.0936
ENSG00000068489	PRR11	371.868	697.618	242.714	605.542	91.6459	384.067	104.336	233.279
ENSG00000068615	REEP1	0	0	2.82226	12.0786	0.907385	1.88731	2.33587	0
ENSG00000068650	ATP11A	237.823	155.314	177.802	157.827	165.144	258.561	137.816	156.896
ENSG00000068654	POLR1A	100.534	80.2454	129.824	92.6028	118.867	50.0136	116.015	140.38
ENSG00000068697	LAPTM4A	1751.24	408.993	657.586	951.796	2211.3	1155.03	1392.96	988.856
ENSG00000068724	TTC7A	82.157	25.8856	25.4003	48.3145	94.3681	59.4501	24.9159	55.7393
ENSG00000068745	IP6K2	371.868	204.496	289.281	211.779	304.881	153.815	288.091	272.503
ENSG00000068781	STON1-GTF2A1L	0	0	0	0	0	0	0	0
ENSG00000068784	SRBD1	116.749	104.837	98.0734	33.0149	91.6459	61.3374	102	65.0292
ENSG00000068796	KIF2A	331.871	301.568	285.048	281.029	512.673	412.376	365.953	445.914
ENSG00000068831	RASGRP2	0	0	2.11669	0	0	0	0	0
ENSG00000068878	PSME4	316.737	254.973	233.542	162.659	282.197	176.463	240.595	255.988
ENSG00000068885	IFT80	14.0532	32.357	5.64451	25.7677	6.3517	34.9152	0.778623	25.8052
ENSG00000068903	SIRT2	24.8633	49.1827	72.6731	20.9363	12.7034	29.2532	56.0609	48.5138
ENSG00000068912	ERLEC1	187.015	262.739	354.899	352.696	329.381	383.123	661.83	220.893
ENSG00000068971	PPP2R5B	17.2962	6.47141	32.456	5.63669	15.4256	23.5913	65.4043	17.5476
ENSG00000068976	PYGM	0	3.88284	2.11669	0	1.81477	0	0	5.16104
ENSG00000068985	PAGE1	0	0	0	0	0	0	0	0
ENSG00000069011	PITX1	439.972	265.328	222.253	185.206	647.873	541.657	337.922	866.023
ENSG00000069018	TRPC7	0	0	0	0	0	0	0	0
ENSG00000069020	MAST4	63.7797	90.5997	43.745	29.7939	125.219	49.07	115.236	60.9003
ENSG00000069122	ADGRF5	0	0	0	0	0	0	0	0
ENSG00000069188	SDK2	0	14.2371	0	0	0	0	0	6.19325
ENSG00000069206	ADAM7	0	0	0	0	0	0	0	0
ENSG00000069248	NUP133	104.858	86.7168	127.707	97.4343	122.497	95.3089	97.3279	88.77
ENSG00000069275	NUCKS1	5345.61	4404.44	3297.1	5783.25	4836.36	6097.89	2226.86	3841.88
ENSG00000069329	VPS35	595.638	754.566	929.228	662.714	787.61	587.896	1220.88	891.828
ENSG00000069345	DNAJA2	185.934	308.039	388.06	269.756	409.231	219.871	447.708	437.657
ENSG00000069399	BCL3	65.9418	73.774	76.9065	29.7939	164.237	195.336	123.022	199.216
ENSG00000069424	KCNAB2	41.0785	10.3543	31.0448	93.4081	58.0727	66.9994	32.7022	12.3865
ENSG00000069431	ABCC9	1.08101	1.29428	19.0502	0	0	0	0.778623	0
ENSG00000069482	GAL	155.666	7.76569	28.2226	28.9887	192.366	17.9294	19.4656	19.612
ENSG00000069493	CLEC2D	5.40506	22.0028	3.52782	9.6629	7.25908	10.3802	1.55725	17.5476
ENSG00000069509	FUNDC1	63.7797	42.7113	114.301	71.6665	71.6834	89.647	146.381	47.4816
ENSG00000069535	MAOB	68.1038	9.05997	23.9892	15.2996	157.885	29.2532	77.8623	18.5798
ENSG00000069667	RORA	219.446	14.2371	61.3841	8.05242	280.382	16.9858	202.442	5.16104
ENSG00000069696	DRD4	0	0	2.11669	4.02621	5.44431	2.83096	7.00761	9.28988
ENSG00000069702	TGFBR3	101.615	40.1227	43.745	175.543	26.3142	133.055	13.2366	14.4509
ENSG00000069764	PLA2G10	2.16203	45.2998	9.17234	4.02621	0.907385	6.60557	1.55725	20.6442
ENSG00000069812	HES2	179.448	24.5913	21.1669	28.1835	240.457	14.1548	39.7098	29.9341
ENSG00000069849	ATP1B3	435.648	524.184	443.094	506.497	384.731	429.362	488.975	474.816
ENSG00000069869	NEDD4	50.8076	54.3598	270.231	125.618	59.8874	111.351	274.854	47.4816
ENSG00000069943	PIGB	28.1063	16.8257	32.456	29.7939	14.5182	36.8025	19.4656	15.4831
ENSG00000069956	MAPK6	218.365	173.434	446.622	245.599	395.62	412.376	891.524	408.755
ENSG00000069966	GNB5	11.8911	16.8257	47.2728	50.7302	24.4994	40.5771	71.6333	11.3543
ENSG00000069974	RAB27A	57.2937	49.1827	79.7288	45.8988	114.331	200.054	196.213	139.348
ENSG00000069998	HDHD5	51.8886	34.9456	57.1507	135.281	35.388	45.2953	14.7938	43.3528
ENSG00000070010	UFD1	51.8886	69.8912	163.691	99.85	70.7761	133.999	284.976	150.702
ENSG00000070018	LRP6	162.152	443.939	66.323	160.243	129.756	52.8446	82.5341	284.89
ENSG00000070019	GUCY2C	77.8329	695.029	166.513	10.4681	25.4068	12.2675	158.839	312.759
ENSG00000070031	SCT	0	0	0	0	0	0	0	0
ENSG00000070047	PHRF1	323.223	173.434	568.685	111.123	187.829	120.788	477.296	196.12
ENSG00000070061	ELP1	58.3747	55.6541	20.4614	68.4456	58.98	36.8025	10.1221	40.2561
ENSG00000070081	NUCB2	59.4557	583.721	95.2512	214.194	90.7385	217.984	448.487	386.046
ENSG00000070087	PFN2	10.8101	81.5397	7.05564	373.632	9.07385	285.927	17.9083	114.575
ENSG00000070159	PTPN3	202.149	69.8912	182.036	114.344	146.089	77.3795	157.282	68.1258
ENSG00000070182	SPTB	1.08101	0	0	1.61048	0.907385	0	0	2.06442
ENSG00000070190	DAPP1	54.0506	1.29428	3.52782	4.02621	203.254	16.9858	23.3587	4.12884
ENSG00000070193	FGF10	0	0	0	0	0	0	0	0
ENSG00000070214	SLC44A1	477.808	643.258	381.71	1782	681.446	1356.03	454.716	656.485
ENSG00000070269	TMEM260	86.481	221.322	175.685	79.7189	78.9425	89.647	98.1065	146.574
ENSG00000070366	SMG6	56.2127	56.9484	47.9784	30.5992	78.0351	50.0136	58.3967	67.0936
ENSG00000070367	EXOC5	163.233	238.148	163.691	239.157	156.07	243.462	167.404	221.925
ENSG00000070371	CLTCL1	2.16203	0	0	0.805242	0	0	3.11449	0
ENSG00000070388	FGF22	0	0	0.705564	0	0	0	0	0
ENSG00000070404	FSTL3	46.4835	0	29.6337	35.4306	84.3868	20.7604	22.5801	20.6442
ENSG00000070413	DGCR2	149.18	44.0056	220.842	140.917	241.364	157.59	315.342	194.055
ENSG00000070423		556.721	170.845	539.051	310.823	461.859	325.56	264.732	522.298
ENSG00000070444	MNT	59.4557	93.1883	64.9119	50.7302	70.7761	86.8161	151.832	92.8988
ENSG00000070476	ZXDC	83.238	157.902	101.601	83.7452	113.423	150.041	153.389	205.41
ENSG00000070495	JMJD6	47.5646	33.6513	81.1399	93.4081	58.98	88.7034	105.114	58.8359
ENSG00000070501	POLB	60.5367	33.6513	60.6785	216.61	148.811	296.307	80.1982	26.8374
ENSG00000070526	ST6GALNAC1	25.9443	865.874	21.1669	48.3145	7.25908	14.1548	5.45036	289.018
ENSG00000070540	WIPI1	33.5114	135.9	175.685	39.4569	72.5908	31.1405	256.946	99.0921
ENSG00000070601	FRMPD1	0	0	2.11669	0	0	0	0	0
ENSG00000070610	GBA2	74.5899	150.137	79.7288	74.0823	63.517	90.5907	89.5417	147.606
ENSG00000070614	NDST1	142.694	45.2998	160.163	62.8089	458.23	134.942	400.212	201.281
ENSG00000070669	ASNS	530.777	243.325	617.369	318.071	1157.82	883.259	1195.97	1170.52
ENSG00000070718	AP3M2	73.5089	62.1255	45.8617	144.944	59.8874	126.449	60.7326	88.77
ENSG00000070729	CNGB1	1.08101	0	0	0	14.5182	0	0	0
ENSG00000070731	ST6GALNAC2	15.1342	0	0	12.0786	274.03	33.0279	34.2594	21.6764
ENSG00000070748	CHAT	0	0	0	0	0	0	0	0
ENSG00000070756	PABPC1	11105.2	19656.3	4418.24	17772.5	10421.3	17585	4073.76	18002.8
ENSG00000070759	TESK2	30.2684	32.357	5.64451	21.7415	52.6283	12.2675	3.11449	48.5138
ENSG00000070761	CFAP20	123.235	36.2399	79.7288	132.06	54.4431	84.9288	59.954	88.77
ENSG00000070770	CSNK2A2	683.2	346.867	500.951	345.449	656.947	303.856	386.976	454.172
ENSG00000070778		31.3494	41.417	24.6947	25.7677	38.1102	38.6898	41.267	27.8696
ENSG00000070785	EIF2B3	79.9949	142.371	56.4451	57.9774	37.2028	55.6755	40.4884	90.8344
ENSG00000070808	CAMK2A	0	0	0	0	0	0	0	0
ENSG00000070814	TCOF1	271.334	207.085	188.386	187.621	155.163	292.532	95.7707	150.702
ENSG00000070831	CDC42	460.511	626.432	778.237	472.677	446.434	387.841	863.493	562.554
ENSG00000070882	OSBPL3	355.653	163.079	99.4846	296.329	220.495	224.589	128.473	58.8359
ENSG00000070886	EPHA8	0	0	0	0	0	0	0	0
ENSG00000070915	SLC12A3	0	0	0	0	0	0	2.33587	1.03221
ENSG00000070950	RAD18	56.2127	135.9	60.6785	136.086	61.7022	138.717	34.2594	58.8359
ENSG00000070961	ATP2B1	273.496	330.042	378.888	422.752	195.088	413.32	323.129	287.986
ENSG00000070985	TRPM5	4.32405	10.3543	9.8779	2.41573	9.07385	1.88731	10.9007	6.19325
ENSG00000071051	NCK2	77.8329	134.605	59.973	95.0185	78.9425	57.5628	71.6333	113.543
ENSG00000071054	MAP4K4	275.658	157.902	155.93	342.228	182.384	408.602	259.282	100.124
ENSG00000071073	MGAT4A	37.8354	381.813	98.0734	64.4193	34.4806	79.2668	77.0837	311.727
ENSG00000071082	RPL31	4174.87	4020.04	1870.45	4275.83	4075.97	3348.08	1805.63	3947.17
ENSG00000071127	WDR1	468.078	205.791	531.995	525.018	535.357	513.347	587.861	326.178
ENSG00000071189	SNX13	256.2	383.107	270.937	269.756	244.994	273.659	267.068	274.568
ENSG00000071203		0	0	3.52782	4.02621	0	0.943653	12.458	0
ENSG00000071205	ARHGAP10	4.32405	7.76569	14.8168	24.1573	8.16647	25.4786	66.9616	14.4509
ENSG00000071242	RPS6KA2	172.962	100.954	141.113	5.63669	344.806	4.71826	314.564	344.758
ENSG00000071243	ING3	150.261	169.551	110.068	57.1722	105.257	66.0557	87.9844	194.055
ENSG00000071246	VASH1	0	0	0	0	0	0	0	0
ENSG00000071282	LMCD1	2.16203	10.3543	2.82226	87.7714	0	17.9294	0	2.06442
ENSG00000071462	BUD23	378.354	815.397	181.33	301.16	385.639	236.857	256.167	344.758
ENSG00000071537	SEL1L	232.418	311.922	517.179	281.835	567.116	452.01	726.455	452.107
ENSG00000071539	TRIP13	46.4835	78.9512	26.1059	176.348	6.3517	88.7034	8.56486	23.7408
ENSG00000071553	ATP6AP1	288.63	311.922	576.446	292.303	252.253	212.322	790.303	312.759
ENSG00000071564	TCF3	300.521	203.202	142.524	253.651	257.697	203.829	148.717	149.67
ENSG00000071575	TRIB2	29.1873	19.4142	24.6947	0	32.6659	0	92.6562	90.8344
ENSG00000071626	DAZAP1	603.205	515.124	639.947	476.703	733.167	565.248	396.319	648.227
ENSG00000071655	MBD3	87.562	59.5369	73.3787	46.704	83.4795	34.9152	76.3051	92.8988
ENSG00000071677	PRLH	0	0	0	0	0	0	0	0
ENSG00000071794	HLTF	90.8051	110.014	63.5008	579.774	73.4982	479.376	49.8319	59.8681
ENSG00000071859	FAM50A	129.722	125.545	148.168	92.6028	183.292	153.815	255.388	156.896
ENSG00000071889	FAM3A	111.344	124.251	141.113	45.0935	72.5908	73.6049	236.701	150.702
ENSG00000071894	CPSF1	227.013	201.908	131.941	336.591	129.756	225.533	97.3279	161.025
ENSG00000071909	MYO3B	6.48608	2.58856	3.52782	0	2.72216	0	0	15.4831
ENSG00000071967	CYBRD1	21.6203	9.05997	2.11669	0	3.62954	0	0	6.19325
ENSG00000071991	CDH19	0	0	0	0	0	0	0	0
ENSG00000071994	PDCD2	168.638	172.139	169.335	311.629	146.996	220.815	155.725	311.727
ENSG00000072041	SLC6A15	0	0	0	0	0	0	0	0
ENSG00000072042	RDH11	542.668	658.789	359.838	667.545	376.565	529.389	415.006	381.917
ENSG00000072062	PRKACA	90.8051	37.5342	83.9621	93.4081	79.8499	100.027	82.5341	74.319
ENSG00000072071	ADGRL1	21.6203	122.957	47.9784	116.76	36.2954	103.802	29.5877	145.541
ENSG00000072080	SPP2	0	0	0	0	0	0	0	0
ENSG00000072110	ACTN1	1251.81	1072.96	1085.86	1549.29	715.02	1064.44	819.112	845.379
ENSG00000072121	ZFYVE26	49.7266	37.5342	38.1005	40.2621	38.1102	37.7461	86.4272	57.8037
ENSG00000072133	RPS6KA6	4.32405	2.58856	20.4614	0.805242	4.53693	4.71826	18.687	0
ENSG00000072134	EPN2	90.8051	97.0711	62.7952	90.9923	95.2755	120.788	70.8547	75.3512
ENSG00000072135	PTPN18	67.0228	147.548	87.49	90.9923	42.6471	48.1263	66.183	105.285
ENSG00000072163	LIMS2	0	0	5.64451	0	0.907385	0	17.1297	0
ENSG00000072182	ASIC4	0	0	2.11669	2.41573	0	0	0	1.03221
ENSG00000072195	SPEG	0	2.58856	2.11669	16.1048	0	4.71826	3.11449	0
ENSG00000072201	LNX1	31.3494	63.4198	40.2172	4.83145	29.0363	13.2111	40.4884	16.5153
ENSG00000072210	ALDH3A2	217.284	358.516	160.163	222.247	288.549	221.758	135.48	246.698
ENSG00000072274	TFRC	657.256	427.113	437.45	753.706	422.842	245.35	285.755	463.462
ENSG00000072310	SREBF1	112.425	113.897	148.168	192.453	86.2016	185.9	73.1906	86.7055
ENSG00000072315	TRPC5	0	0	0	0	0	0	0	0
ENSG00000072364	AFF4	375.111	335.219	318.915	227.883	626.096	282.152	597.204	423.206
ENSG00000072401	UBE2D1	126.478	98.3654	81.1399	121.592	127.034	189.674	124.58	74.319
ENSG00000072415	MPP5	143.775	204.496	127.002	153.801	192.366	194.393	182.198	206.442
ENSG00000072422	RHOBTB1	16.2152	0	2.82226	39.4569	9.98124	33.9715	8.56486	0
ENSG00000072501	SMC1A	583.747	610.901	724.614	654.662	460.952	809.654	844.028	563.586
ENSG00000072506	HSD17B10	191.339	177.317	274.464	166.685	243.179	185.9	295.098	150.702
ENSG00000072518	MARK2	352.41	231.676	539.051	231.91	445.526	385.954	748.257	287.986
ENSG00000072571	HMMR	185.934	381.813	92.4289	273.782	98.905	251.955	70.8547	138.316
ENSG00000072609	CHFR	45.4025	67.3026	1.41113	40.2621	45.3693	66.9994	0	85.6733
ENSG00000072657	TRHDE	0	23.2971	0	0	4.53693	0	0	10.3221
ENSG00000072682	P4HA2	95.1291	119.074	125.59	185.206	88.0164	264.223	173.633	74.319
ENSG00000072694	FCGR2B	0	0	0	0	0	0	0	0
ENSG00000072736	NFATC3	71.3468	75.0683	107.951	48.3145	29.9437	33.9715	54.5036	45.4172
ENSG00000072756	TRNT1	90.8051	90.5997	47.2728	90.1871	77.1278	55.6755	40.4884	113.543
ENSG00000072778	ACADVL	367.544	313.216	386.649	388.127	323.029	327.448	376.854	541.91
ENSG00000072786	STK10	75.6709	53.0655	93.1345	41.0673	118.867	73.6049	99.6638	97.0276
ENSG00000072803	FBXW11	123.235	75.0683	101.601	130.449	169.681	157.59	134.702	97.0276
ENSG00000072818	ACAP1	2.16203	0	14.8168	3.22097	4.53693	0.943653	3.89312	0
ENSG00000072832	CRMP1	0	0	0	0	0	0	0	0
ENSG00000072840	EVC	0	0	0	0	0	0	0	0
ENSG00000072849	DERL2	38.9165	67.3026	88.9011	53.9512	74.4056	79.2668	101.221	73.2868
ENSG00000072858	SIDT1	9.72911	142.371	4.93895	3.22097	7.25908	12.2675	3.89312	106.318
ENSG00000072864	NDE1	122.154	97.0711	118.535	140.917	284.012	148.154	210.228	118.704
ENSG00000072952	MRVI1	3.24304	0	9.8779	0.805242	9.98124	0	1.55725	0
ENSG00000072954	TMEM38A	44.3215	84.1283	21.8725	37.0411	73.4982	24.535	41.267	132.123
ENSG00000072958	AP1M1	95.1291	139.782	101.601	53.9512	104.349	69.8303	127.694	116.64
ENSG00000073008	PVR	237.823	25.8856	479.784	112.734	627.003	273.659	758.379	80.5123
ENSG00000073050	XRCC1	100.534	71.1855	64.9119	61.1984	50.8136	51.9009	55.2822	76.3835
ENSG00000073060	SCARB1	130.803	50.477	127.707	115.955	127.941	70.774	88.763	27.8696
ENSG00000073067	CYP2W1	29.1873	6.47141	176.391	4.83145	0	0	102	16.5153
ENSG00000073111	MCM2	156.747	125.545	114.301	380.879	61.7022	355.757	42.8243	153.799
ENSG00000073146	MOV10L1	0	0	0	0	0.907385	0	7.00761	0
ENSG00000073150	PANX2	2.16203	0	0	4.02621	3.62954	6.60557	10.1221	1.03221
ENSG00000073169	SELENOO	27.0253	24.5913	90.3122	47.5093	19.9625	35.8588	27.2518	4.12884
ENSG00000073282	TP63	0	0	0	0	0	0	0	0
ENSG00000073331	ALPK1	45.4025	100.954	45.8617	35.4306	388.361	180.238	242.152	260.117
ENSG00000073350	LLGL2	675.633	366.282	510.123	504.081	548.968	469.939	390.869	406.69
ENSG00000073417	PDE8A	28.1063	75.0683	111.479	25.7677	35.388	74.5486	81.7554	69.158
ENSG00000073464	CLCN4	16.2152	31.0628	103.718	15.2996	25.4068	12.2675	230.472	55.7393
ENSG00000073536	NLE1	37.8354	29.7685	22.5781	36.2359	3.62954	5.66192	8.56486	15.4831
ENSG00000073578	SDHA	184.853	73.774	81.8455	347.059	167.866	340.659	66.183	59.8681
ENSG00000073584	SMARCE1	168.638	226.499	192.619	156.217	205.976	204.773	264.732	239.472
ENSG00000073598	FNDC8	0	0	0	0	0	0	0	0
ENSG00000073605	GSDMB	14.0532	139.782	24.6947	55.5617	284.919	270.828	447.708	414.948
ENSG00000073614	KDM5A	699.415	1677.39	826.921	370.411	753.13	352.926	1178.06	1517.35
ENSG00000073670	ADAM11	0	6.47141	1.41113	1.61048	0	0	0	0
ENSG00000073711	PPP2R3A	44.3215	91.894	7.76121	7.24718	23.592	2.83096	3.89312	41.2884
ENSG00000073712	FERMT2	0	27.1799	0.705564	8.85766	12.7034	13.2111	8.56486	25.8052
ENSG00000073734	ABCB11	0	0	0	0	0	0	0	5.16104
ENSG00000073737	DHRS9	0	5.17713	9.17234	17.7153	10.8886	61.3374	48.2746	41.2884
ENSG00000073754	CD5L	0	0	0	0	0	0	0	0
ENSG00000073756	PTGS2	21.6203	0	8.46677	0	64.4244	0	0.778623	1.03221
ENSG00000073792	IGF2BP2	274.577	1014.72	421.222	631.31	595.245	1408.87	415.785	997.114
ENSG00000073803	MAP3K13	471.321	603.135	328.087	340.617	464.581	466.165	339.48	450.043
ENSG00000073849	ST6GAL1	287.549	73.774	680.869	344.644	191.458	222.702	432.136	65.0292
ENSG00000073861	TBX21	0	0	0	0	1.81477	0.943653	2.33587	10.3221
ENSG00000073910	FRY	0	60.8312	23.2836	12.8839	0.907385	0.943653	24.1373	55.7393
ENSG00000073921	PICALM	197.825	147.548	323.148	236.741	258.605	314.236	503.769	290.051
ENSG00000073969	NSF	55.1316	54.3598	57.1507	129.644	71.6834	68.8867	63.8471	111.479
ENSG00000074047	GLI2	2.16203	0	0	2.41573	9.07385	6.60557	0	0
ENSG00000074054	CLASP1	125.397	84.1283	86.7844	95.8238	150.626	94.3653	105.893	108.382
ENSG00000074071	MRPS34	609.691	595.369	685.103	579.774	582.541	467.108	354.274	444.882
ENSG00000074181	NOTCH3	15.1342	3.88284	3.52782	12.8839	10.8886	8.49288	0	0
ENSG00000074201	CLNS1A	408.623	165.668	367.599	518.576	334.825	303.856	298.213	258.052
ENSG00000074211	PPP2R2C	2.16203	6.47141	28.9281	1.61048	0	0.943653	6.22899	3.09663
ENSG00000074219	TEAD2	117.83	40.1227	43.745	90.9923	71.6834	74.5486	16.3511	4.12884
ENSG00000074266	EED	132.965	72.4798	118.535	122.397	83.4795	79.2668	68.5188	58.8359
ENSG00000074276	CDHR2	0	16.8257	84.6677	1.61048	1.81477	0	76.3051	98.0598
ENSG00000074317	SNCB	0	0	0	0	0	0	0	0
ENSG00000074319	TSG101	151.342	173.434	275.876	223.052	157.885	167.027	485.861	162.057
ENSG00000074356	NCBP3	191.339	177.317	216.608	97.4343	190.551	122.675	225.801	190.959
ENSG00000074370	ATP2A3	9.72911	32.357	14.8168	11.2734	0	5.66192	5.45036	14.4509
ENSG00000074410	CA12	6.48608	282.153	412.755	250.43	7.25908	66.0557	90.3203	116.64
ENSG00000074416	MGLL	328.628	542.304	447.328	425.168	351.158	379.348	337.144	835.057
ENSG00000074527	NTN4	6.48608	25.8856	16.9335	36.2359	56.2579	45.2953	34.2594	48.5138
ENSG00000074582	BCS1L	54.0506	24.5913	38.1005	62.0036	17.2403	63.2247	42.8243	39.2239
ENSG00000074590	NUAK1	14.0532	16.8257	4.93895	25.7677	3.62954	19.8167	20.2442	14.4509
ENSG00000074603	DPP8	132.965	195.436	186.269	206.142	177.848	190.618	178.305	177.54
ENSG00000074621	SLC24A1	104.858	85.4226	150.285	37.0411	82.5721	27.3659	151.053	73.2868
ENSG00000074657	ZNF532	7.56709	14.2371	23.2836	45.0935	19.0551	87.7597	24.9159	21.6764
ENSG00000074660	SCARF1	0	0	0.705564	0	0	0.943653	1.55725	0
ENSG00000074695	LMAN1	618.339	585.015	203.203	616.01	854.757	670.937	217.236	487.203
ENSG00000074696	HACD3	845.352	464.647	518.59	1381.8	384.731	691.698	221.908	413.916
ENSG00000074706	IPCEF1	0	0	0	0.805242	0	0.943653	0	0
ENSG00000074755	ZZEF1	32.4304	155.314	182.036	33.0149	68.9613	45.2953	266.289	176.508
ENSG00000074771	NOX3	0	0	0	0	0	0	0	0
ENSG00000074800	ENO1	1512.34	1616.56	1658.78	2126.64	3265.68	2678.09	2030.65	2230.6
ENSG00000074803	SLC12A1	0	0	0	0	0	0	0	0
ENSG00000074842	MYDGF	380.516	161.785	593.38	567.696	697.779	930.442	720.226	462.43
ENSG00000074855	ANO8	24.8633	172.139	27.517	46.704	8.16647	41.5207	17.1297	145.541
ENSG00000074935	TUBE1	20.5392	82.834	79.0232	35.4306	65.3317	76.4359	98.1065	209.538
ENSG00000074964	ARHGEF10L	48.6456	31.0628	146.052	45.8988	62.6096	24.535	102.778	143.477
ENSG00000074966	TXK	7.56709	1.29428	1.41113	1.61048	9.07385	0	4.67174	1.03221
ENSG00000075035	WSCD2	0	0	0	0	0	0	0	0
ENSG00000075043	KCNQ2	3.24304	0	0	0	0	0	0	0
ENSG00000075073	TACR2	0	10.3543	1.41113	0.805242	0	0	0	0
ENSG00000075089	ACTR6	58.3747	46.5941	57.8563	68.4456	76.2204	82.0978	102	52.6427
ENSG00000075131	TIPIN	30.2684	50.477	40.9227	82.1347	27.2216	58.5065	13.2366	29.9341
ENSG00000075142	SRI	283.225	163.079	371.832	648.22	262.234	324.617	288.091	190.959
ENSG00000075151	EIF4G3	243.228	367.576	381.71	214.194	325.751	227.42	518.563	531.588
ENSG00000075188	NUP37	171.881	64.7141	28.9281	189.232	52.6283	95.3089	16.3511	31.9985
ENSG00000075213	SEMA3A	1131.82	207.085	685.103	475.093	361.139	238.744	260.06	151.735
ENSG00000075218	GTSE1	70.2658	210.968	153.107	128.033	12.7034	83.9851	42.0457	84.6411
ENSG00000075223	SEMA3C	170.8	112.602	122.768	25.7677	45.3693	14.1548	52.1678	25.8052
ENSG00000075234	TTC38	37.8354	25.8856	72.6731	20.131	27.2216	18.8731	43.6029	13.4187
ENSG00000075239	ACAT1	138.37	78.9512	116.418	217.415	86.2016	95.3089	76.3051	18.5798
ENSG00000075240	GRAMD4	11.8911	10.3543	4.93895	24.1573	0.907385	10.3802	10.9007	17.5476
ENSG00000075275	CELSR1	10.8101	20.7085	19.0502	33.0149	8.16647	40.5771	15.5725	37.1595
ENSG00000075290	WNT8B	0	0	0	0	0	0	0	0
ENSG00000075292	ZNF638	228.094	352.045	274.464	380.074	421.027	565.248	412.67	518.169
ENSG00000075303	SLC25A40	36.7544	36.2399	13.4057	52.3407	9.98124	26.4223	6.22899	16.5153
ENSG00000075336	TIMM21	67.0228	37.5342	50.8006	46.704	19.0551	66.9994	45.9388	29.9341
ENSG00000075340	ADD2	0	0	0	0	0	0	0	0
ENSG00000075388	FGF4	0	0	0	0	0	0	0	0
ENSG00000075391	RASAL2	150.261	73.774	150.991	109.513	186.921	141.548	189.205	76.3835
ENSG00000075399	VPS9D1	9.72911	11.6485	20.4614	5.63669	76.2204	62.2811	161.175	16.5153
ENSG00000075407	ZNF37A	152.423	187.671	149.58	176.348	229.568	193.449	161.175	204.377
ENSG00000075413	MARK3	290.792	352.045	230.72	313.239	423.749	602.994	343.373	378.821
ENSG00000075415	SLC25A3	1306.94	504.77	666.758	950.991	996.309	537.882	460.945	719.45
ENSG00000075420	FNDC3B	182.691	353.339	301.981	429.194	431.008	426.531	541.922	333.403
ENSG00000075426	FOSL2	141.613	45.2998	83.2566	106.292	223.217	238.744	171.297	166.186
ENSG00000075429	CACNG5	0	0	0	0	0	0	0	0
ENSG00000075461	CACNG4	68.1038	2.58856	9.8779	10.4681	30.8511	0.943653	4.67174	1.03221
ENSG00000075539	FRYL	157.828	472.413	227.192	265.73	207.791	316.124	353.495	434.56
ENSG00000075568	TMEM131	92.9671	222.616	149.58	134.475	156.07	161.365	189.205	245.666
ENSG00000075618	FSCN1	23.7823	18.1199	21.8725	326.123	57.1653	387.841	31.1449	14.4509
ENSG00000075624	ACTB	4162.98	3357.37	7172.77	3571.25	6070.41	3401.87	9385.52	3327.84
ENSG00000075643	MOCOS	42.1595	51.7713	48.6839	43.4831	146.996	87.7597	139.374	103.221
ENSG00000075651	PLD1	86.481	165.668	75.4954	411.479	44.4619	101.915	39.7098	63.9969
ENSG00000075673	ATP12A	0	0	0	0	0	0	2.33587	0
ENSG00000075702	WDR62	6.48608	6.47141	2.82226	8.05242	2.72216	13.2111	3.11449	5.16104
ENSG00000075711	DLG1	353.491	526.773	261.764	434.831	264.957	306.687	214.9	308.63
ENSG00000075785	RAB7A	487.537	639.375	527.056	1017.02	452.785	610.543	771.616	615.196
ENSG00000075790	BCAP29	152.423	137.194	110.068	165.88	188.736	216.097	189.984	114.575
ENSG00000075826	SEC31B	2.16203	0	8.46677	5.63669	4.53693	0	1.55725	2.06442
ENSG00000075856	SART3	192.42	203.202	342.904	225.468	368.398	207.604	381.525	278.696
ENSG00000075884	ARHGAP15	0	0	0	0	0	0	0	0
ENSG00000075886	TUBA3D	0	0	0	0	0	0	0	0
ENSG00000075891	PAX2	0	0	0.705564	0	0	0	1.55725	0
ENSG00000075914	EXOSC7	156.747	77.6569	138.291	160.243	173.311	136.83	109.007	72.2546
ENSG00000075945	KIFAP3	85.4	128.134	76.2009	67.6403	62.6096	65.1121	42.8243	62.9647
ENSG00000075975	MKRN2	47.5646	47.8884	31.0448	49.925	38.1102	26.4223	23.3587	61.9325
ENSG00000076003	MCM6	87.562	129.428	74.7898	184.4	48.0914	135.886	39.7098	114.575
ENSG00000076043	REXO2	316.737	232.971	396.527	297.939	481.822	196.28	288.869	473.784
ENSG00000076053	RBM7	59.4557	98.3654	46.5672	71.6665	63.517	77.3795	87.9844	74.319
ENSG00000076067	RBMS2	110.263	28.4742	79.0232	49.925	172.403	66.0557	66.9616	34.0629
ENSG00000076108	BAZ2A	516.724	480.178	434.628	583.8	1018.09	909.681	997.416	864.991
ENSG00000076201	PTPN23	196.744	150.137	285.754	123.202	329.381	166.083	333.251	201.281
ENSG00000076242	MLH1	105.939	49.1827	74.7898	77.3032	66.2391	93.4216	41.267	73.2868
ENSG00000076248	UNG	209.716	81.5397	129.824	272.977	65.3317	146.266	86.4272	36.1273
ENSG00000076258	FMO4	1.08101	9.05997	7.76121	3.22097	0	9.43653	3.89312	0
ENSG00000076321	KLHL20	77.8329	54.3598	100.19	66.0298	45.3693	97.1963	83.3127	46.4494
ENSG00000076344	RGS11	0	1.29428	4.93895	5.63669	0	0	5.45036	0
ENSG00000076351	SLC46A1	50.8076	5.17713	18.3447	12.0786	27.2216	9.43653	4.67174	0
ENSG00000076356	PLXNA2	48.6456	58.2427	59.2674	16.9101	53.5357	8.49288	87.2058	46.4494
ENSG00000076382	SPAG5	23.7823	51.7713	16.228	36.2359	6.3517	49.07	10.1221	20.6442
ENSG00000076513	ANKRD13A	45.4025	103.543	63.5008	55.5617	77.1278	93.4216	106.671	129.026
ENSG00000076554	TPD52	206.473	893.054	207.436	607.958	272.216	619.98	172.076	1066.27
ENSG00000076555	ACACB	11.8911	5.17713	41.6283	10.4681	5.44431	2.83096	19.4656	3.09663
ENSG00000076604	TRAF4	237.823	126.84	250.475	195.674	252.253	225.533	101.221	221.925
ENSG00000076641	PAG1	237.823	49.1827	218.725	133.67	169.681	63.2247	118.351	68.1258
ENSG00000076650	GPATCH1	63.7797	110.014	165.808	45.0935	96.1828	51.9009	142.488	58.8359
ENSG00000076662	ICAM3	39.9975	28.4742	45.8617	31.4044	61.7022	41.5207	31.1449	4.12884
ENSG00000076685	NT5C2	193.501	89.3054	116.418	164.269	187.829	192.505	148.717	83.6089
ENSG00000076706		0	0	1.41113	0	0	1.88731	3.89312	0
ENSG00000076716	GPC4	0	90.5997	35.9838	9.6629	1.81477	13.2111	73.9692	54.7071
ENSG00000076770	MBNL3	86.481	251.091	127.707	77.3032	61.7022	104.745	111.343	97.0276
ENSG00000076826	CAMSAP3	87.562	38.8284	96.6623	70.056	101.627	41.5207	84.0913	101.156
ENSG00000076864	RAP1GAP	24.8633	213.556	20.4614	16.1048	2.72216	12.2675	19.4656	275.6
ENSG00000076924	XAB2	7.56709	7.76569	4.23339	4.02621	0	2.83096	1.55725	4.12884
ENSG00000076928	ARHGEF1	62.6987	75.0683	47.2728	77.3032	39.925	72.6613	71.6333	30.9663
ENSG00000076944	STXBP2	23.7823	63.4198	44.4505	50.7302	43.5545	37.7461	45.9388	42.3206
ENSG00000076984	MAP2K7	323.223	150.137	259.648	251.235	258.605	255.73	184.534	269.407
ENSG00000077009	NMRK2	0	0	0	0	0	0	0	0
ENSG00000077044	DGKD	497.266	519.007	455.794	111.123	466.396	139.661	361.281	430.431
ENSG00000077063	CTTNBP2	9.72911	6.47141	23.9892	0	0	1.88731	6.22899	1.03221
ENSG00000077080	ACTL6B	0	0	0	0	0	0	0	0
ENSG00000077092	RARB	1.08101	55.6541	0	0	0	0	2.33587	29.9341
ENSG00000077097	TOP2B	347.005	320.982	349.254	451.741	238.642	268.941	375.296	231.215
ENSG00000077147	TM9SF3	1295.05	865.874	1449.23	1744.96	790.333	1076.71	1167.93	785.511
ENSG00000077150	NFKB2	135.127	151.431	101.601	103.876	174.218	196.28	125.358	129.026
ENSG00000077152	UBE2T	107.02	68.5969	28.2226	233.52	28.1289	219.871	4.67174	50.5782
ENSG00000077157	PPP1R12B	190.258	106.131	92.4289	166.685	73.4982	96.2526	127.694	78.4479
ENSG00000077232	DNAJC10	282.144	790.806	316.798	384.906	513.58	415.207	620.563	1144.72
ENSG00000077235	GTF3C1	118.911	110.014	207.436	140.112	120.682	122.675	200.106	105.285
ENSG00000077238	IL4R	147.018	93.1883	254.003	95.8238	272.216	100.971	368.289	135.219
ENSG00000077254	USP33	180.529	421.936	103.718	168.296	353.88	234.026	189.984	473.784
ENSG00000077264	PAK3	0	0	0	0	0	0	1.55725	1.03221
ENSG00000077274	CAPN6	0	31.0628	2.82226	0	0	0	5.45036	8.25767
ENSG00000077279	DCX	0	0	0	0	0	0	0	0
ENSG00000077312	SNRPA	254.038	182.494	294.22	241.573	137.923	249.124	174.412	75.3512
ENSG00000077327	SPAG6	0	0	0	0	0	0	0	0
ENSG00000077348	EXOSC5	99.4532	94.4825	138.291	218.221	66.2391	116.069	72.412	133.155
ENSG00000077380	DYNC1I2	473.483	447.821	436.744	831.01	515.395	594.501	671.952	509.911
ENSG00000077420	APBB1IP	0	0	0	0	0	0	0	0
ENSG00000077454	LRCH4	3.24304	12.9428	2.11669	2.41573	1.81477	2.83096	4.67174	14.4509
ENSG00000077458	FAM76B	72.4278	128.134	69.1453	107.097	53.5357	101.915	112.122	78.4479
ENSG00000077463	SIRT6	77.8329	44.0056	85.3733	45.8988	146.996	83.0415	118.351	111.479
ENSG00000077498	TYR	0	0	0	0	0	0	0	0
ENSG00000077514	POLD3	95.1291	156.608	103.718	102.266	92.5533	115.126	105.893	100.124
ENSG00000077522	ACTN2	0	0	0	0	0	0	0	0
ENSG00000077549	CAPZB	822.651	943.531	1043.53	1070.97	1100.66	1147.48	903.982	1147.82
ENSG00000077585	GPR137B	11.8911	0	25.4003	26.573	12.7034	7.54922	103.557	5.16104
ENSG00000077616	NAALAD2	0	0	0	0	0	0	0	0
ENSG00000077684	JADE1	23.7823	137.194	28.2226	38.6516	9.98124	57.5628	13.2366	61.9325
ENSG00000077713	SLC25A43	22.7013	44.0056	23.2836	51.5355	29.9437	47.1826	14.0152	51.6104
ENSG00000077721	UBE2A	149.18	130.722	193.325	243.183	157.885	190.618	268.625	136.252
ENSG00000077782	FGFR1	6.48608	99.6597	38.1005	37.8464	3.62954	37.7461	36.5953	36.1273
ENSG00000077800	FKBP6	2.16203	0	0	0	0	0	0	0
ENSG00000077935	SMC1B	3.24304	3.88284	0.705564	14.4944	12.7034	16.9858	4.67174	3.09663
ENSG00000077942	FBLN1	45.4025	0	53.6229	4.83145	87.109	0	70.0761	0
ENSG00000077943	ITGA8	0	0	0	0	0	0	0	0
ENSG00000077984	CST7	1.08101	0	0	7.24718	0	10.3802	0	0
ENSG00000078018	MAP2	482.132	20.7085	55.7396	3.22097	123.404	17.9294	34.2594	19.612
ENSG00000078043	PIAS2	33.5114	25.8856	19.0502	34.6254	16.3329	34.9152	14.7938	21.6764
ENSG00000078053	AMPH	0	0	0	0	0	0	0	0
ENSG00000078061	ARAF	48.6456	64.7141	126.296	66.0298	44.4619	84.9288	84.8699	48.5138
ENSG00000078070	MCCC1	49.7266	141.077	19.7558	57.1722	19.0551	35.8588	18.687	57.8037
ENSG00000078081	LAMP3	4.32405	0	89.6067	4.02621	274.938	315.18	493.647	95.9954
ENSG00000078098	FAP	0	45.2998	56.4451	0	7.25908	4.71826	194.656	177.54
ENSG00000078114	NEBL	294.035	249.796	455.089	372.827	622.466	556.755	693.753	530.555
ENSG00000078124	ACER3	59.4557	56.9484	100.896	70.056	120.682	89.647	113.679	61.9325
ENSG00000078140	UBE2K	585.909	597.958	462.85	815.71	626.096	757.753	547.372	701.902
ENSG00000078142	PIK3C3	49.7266	66.0083	67.7342	44.2883	97.9976	44.3517	102	91.8666
ENSG00000078177	N4BP2	94.0481	95.7768	74.7898	108.708	88.0164	149.097	138.595	107.35
ENSG00000078237	TIGAR	170.8	44.0056	64.2063	33.0149	134.293	50.0136	60.7326	70.1902
ENSG00000078246	TULP3	139.451	154.019	79.7288	61.1984	186.014	74.5486	185.312	127.994
ENSG00000078269	SYNJ2	154.585	282.153	252.592	165.075	90.7385	162.308	179.862	213.667
ENSG00000078295	ADCY2	0	0	0	0	0	0	0	0
ENSG00000078304	PPP2R5C	447.539	816.692	575.74	733.575	488.173	759.641	534.914	594.552
ENSG00000078328	RBFOX1	0	0	0	0	5.44431	0	0	0
ENSG00000078369	GNB1	559.964	783.04	1096.45	1218.33	825.721	1262.61	1452.13	1058.01
ENSG00000078399	HOXA9	361.058	75.0683	18.3447	455.767	307.604	228.364	5.45036	93.931
ENSG00000078401	EDN1	85.4	59.5369	143.23	35.4306	165.144	18.8731	164.289	34.0629
ENSG00000078403	MLLT10	114.587	100.954	115.007	103.071	94.3681	106.633	90.3203	87.7378
ENSG00000078487	ZCWPW1	6.48608	56.9484	17.6391	8.05242	17.2403	6.60557	17.9083	97.0276
ENSG00000078549	ADCYAP1R1	0	0	0	0	0	0	0	0
ENSG00000078579	FGF20	150.261	0	0	0	29.0363	0	0	3.09663
ENSG00000078589	P2RY10	0	0	0	0	0	0	0	0
ENSG00000078596	ITM2A	0	0	0	0	0	0	0	0
ENSG00000078618	NRDC	376.192	222.616	146.052	202.921	509.043	303.856	214.121	439.721
ENSG00000078668	VDAC3	219.446	68.5969	206.73	426.778	240.457	263.279	220.35	99.0921
ENSG00000078674	PCM1	511.319	326.159	244.125	302.771	744.056	369.912	294.32	386.046
ENSG00000078687	TNRC6C	89.724	36.2399	91.7234	11.2734	59.8874	27.3659	127.694	52.6427
ENSG00000078699	CBFA2T2	95.1291	279.565	162.28	124.007	137.015	125.506	116.793	189.926
ENSG00000078725	BRINP1	0	0	2.11669	0	0	0	3.89312	0
ENSG00000078747	ITCH	189.177	188.965	289.987	199.7	300.345	247.237	439.143	239.472
ENSG00000078795	PKD2L2	0	0	0	0	0	0	0	0
ENSG00000078804	TP53INP2	20.5392	40.1227	12.7002	26.573	35.388	36.8025	73.9692	21.6764
ENSG00000078808	SDF4	451.863	442.644	1142.31	712.639	454.6	579.403	853.371	379.853
ENSG00000078814	MYH7B	22.7013	14.2371	24.6947	4.83145	1.81477	0	0.778623	2.06442
ENSG00000078898	BPIFB2	0	0	0	0	0	0	0	0
ENSG00000078900	TP73	0	0	4.23339	0.805242	1.81477	0	0	3.09663
ENSG00000078902	TOLLIP	152.423	51.7713	407.111	93.4081	180.57	97.1963	288.869	85.6733
ENSG00000078967	UBE2D4	51.8886	38.8284	32.456	26.573	35.388	9.43653	43.6029	59.8681
ENSG00000079101	CLUL1	0	0	0	0	0	0	0	0
ENSG00000079102	RUNX1T1	0	7.76569	0	1.61048	0	0	0	1.03221
ENSG00000079112	CDH17	606.448	975.888	1132.43	216.61	394.713	252.899	618.227	829.896
ENSG00000079134	THOC1	37.8354	169.551	43.0394	54.7564	31.7585	33.0279	23.3587	72.2546
ENSG00000079150	FKBP7	1.08101	3.88284	5.64451	3.22097	3.62954	7.54922	3.11449	3.09663
ENSG00000079156	OSBPL6	0	32.357	4.23339	0	0	0	18.687	19.612
ENSG00000079215	SLC1A3	16.2152	0	0	0	13.6108	0	0	0
ENSG00000079246	XRCC5	807.516	947.414	829.038	1538.82	663.299	1125.78	619.005	808.22
ENSG00000079257	LXN	0	12.9428	3.52782	6.44193	9.07385	16.9858	10.9007	4.12884
ENSG00000079263	SP140	0	2.58856	0.705564	0	9.98124	0	0	4.12884
ENSG00000079277	MKNK1	103.777	176.022	40.9227	37.0411	129.756	64.1684	28.0304	140.38
ENSG00000079308	TNS1	0	0	0	0	0	0	0	0
ENSG00000079313	REXO1	73.5089	24.5913	28.9281	25.7677	71.6834	35.8588	53.725	42.3206
ENSG00000079332	SAR1A	212.959	134.605	244.831	228.689	146.089	250.068	329.358	151.735
ENSG00000079335	CDC14A	11.8911	31.0628	5.64451	8.85766	10.8886	3.77461	0.778623	8.25767
ENSG00000079337	RAPGEF3	14.0532	3.88284	20.4614	8.05242	9.07385	4.71826	32.7022	7.22546
ENSG00000079385	CEACAM1	109.182	59.5369	488.956	186.816	651.503	937.991	1493.4	407.723
ENSG00000079387	SENP1	156.747	161.785	99.4846	139.307	118.867	165.139	135.48	125.929
ENSG00000079393	DUSP13	0	0	0	0	0	0	3.11449	0
ENSG00000079432	CIC	70.2658	14.2371	58.5618	38.6516	62.6096	36.8025	91.8775	43.3528
ENSG00000079435	LIPE	28.1063	11.6485	92.4289	15.2996	11.796	4.71826	46.7174	7.22546
ENSG00000079459	FDFT1	684.281	138.488	200.38	960.654	227.754	346.321	144.045	74.319
ENSG00000079462	PAFAH1B3	227.013	103.543	321.737	186.011	121.59	108.52	127.694	107.35
ENSG00000079482	OPHN1	27.0253	41.417	39.5116	12.8839	8.16647	20.7604	31.9236	30.9663
ENSG00000079557	AFM	0	0	0	0	0	0	0	0
ENSG00000079616	KIF22	115.668	111.308	134.057	217.415	99.8124	233.082	126.137	99.0921
ENSG00000079689	SCGN	0	0	0	0	0	0	0	4.12884
ENSG00000079691	CARMIL1	70.2658	408.993	82.551	126.423	104.349	106.633	103.557	353.015
ENSG00000079739	PGM1	4.32405	38.8284	26.8114	92.6028	9.07385	34.9152	7.00761	21.6764
ENSG00000079785	DDX1	397.813	469.824	424.044	690.898	443.711	557.699	667.28	688.483
ENSG00000079805	DNM2	390.246	311.922	347.138	333.37	382.009	281.209	300.549	628.615
ENSG00000079819	EPB41L2	695.091	956.474	1443.58	590.242	1183.23	535.995	1222.44	895.957
ENSG00000079841	RIMS1	0	0	0	0	0	0	0	1.03221
ENSG00000079931	MOXD1	0	1.29428	0	0	0	0	0	0
ENSG00000079950	STX7	61.6177	143.665	91.7234	99.85	43.5545	82.0978	109.007	137.284
ENSG00000079974	RABL2B	131.884	59.5369	311.859	54.7564	96.1828	32.0842	200.885	86.7055
ENSG00000079999	KEAP1	184.853	159.197	203.908	159.438	143.367	159.477	166.625	215.732
ENSG00000080007	DDX43	1.08101	2.58856	71.262	24.9625	0	46.239	35.8167	0
ENSG00000080031	PTPRH	6.48608	16.8257	69.8509	29.7939	31.7585	82.0978	236.701	85.6733
ENSG00000080166	DCT	1.08101	1.29428	0	2.41573	2.72216	0	0	1.03221
ENSG00000080189	SLC35C2	156.747	172.139	306.92	203.726	150.626	171.745	261.617	118.704
ENSG00000080200	CRYBG3	35.6734	231.676	119.946	28.9887	20.8699	29.2532	102.778	122.833
ENSG00000080224	EPHA6	0	2.58856	0	0.805242	0	0	1.55725	0
ENSG00000080293	SCTR	0	0	0	0	0	0	0	0
ENSG00000080298	RFX3	62.6987	187.671	23.9892	91.7976	147.904	122.675	17.1297	270.439
ENSG00000080345	RIF1	287.549	783.04	503.067	533.07	297.622	563.361	333.251	680.226
ENSG00000080371	RAB21	218.365	168.257	152.402	178.764	227.754	229.308	228.915	257.02
ENSG00000080493	SLC4A4	0	0	6.35008	1.61048	0	0.943653	0	0
ENSG00000080503	SMARCA2	276.739	868.463	402.877	258.483	498.155	297.251	758.379	1306.78
ENSG00000080511		0	0	0	0	0	0	0	0
ENSG00000080546	SESN1	103.777	59.5369	42.3339	100.655	60.7948	36.8025	52.9464	25.8052
ENSG00000080561	MID2	1.08101	12.9428	26.1059	4.83145	6.3517	5.66192	40.4884	9.28988
ENSG00000080572	PIH1D3	0	0	1.41113	0	0	0	0	0
ENSG00000080573	COL5A3	0	0	0	0	0	0	0.778623	0
ENSG00000080603	SRCAP	203.23	139.782	220.136	92.6028	197.81	118.9	208.671	146.574
ENSG00000080608	PUM3	950.21	1061.31	590.557	339.007	705.038	382.179	504.548	951.697
ENSG00000080618	CPB2	0	2.58856	0	0	0	0	0	0
ENSG00000080644	CHRNA3	0	0	0	0	0	0	0	0
ENSG00000080709	KCNN2	0	0	0	0	0	0	0	0
ENSG00000080802	CNOT4	114.587	100.954	86.0788	86.9661	112.516	136.83	129.251	89.8022
ENSG00000080815	PSEN1	167.557	208.379	239.186	297.134	254.975	334.997	369.846	276.632
ENSG00000080819	CPOX	34.5924	55.6541	11.9946	53.9512	35.388	16.0421	11.6793	18.5798
ENSG00000080822	CLDND1	36.7544	45.2998	17.6391	75.6927	29.0363	61.3374	8.56486	25.8052
ENSG00000080823	MOK	54.0506	27.1799	26.8114	43.4831	120.682	14.1548	11.6793	37.1595
ENSG00000080824	HSP90AA1	5156.43	8159.15	4162.12	12117.3	6228.29	7400.13	7270	7419.52
ENSG00000080839	RBL1	74.5899	148.842	83.9621	93.4081	11.796	72.6613	30.3663	71.2224
ENSG00000080845	DLGAP4	310.251	291.213	333.732	177.153	456.415	303.856	597.204	346.822
ENSG00000080854	IGSF9B	0	0	0.705564	0	0	0	0	0
ENSG00000080910	CFHR2	0	0	0	0	0	0	0	0
ENSG00000080986	NDC80	76.7519	134.605	31.7504	84.5504	76.2204	260.448	25.6946	225.022
ENSG00000081014	AP4E1	42.1595	54.3598	66.323	33.8202	39.0176	41.5207	86.4272	31.9985
ENSG00000081019	RSBN1	192.42	327.453	72.6731	196.479	240.457	199.111	88.763	387.078
ENSG00000081026	MAGI3	132.965	102.248	55.034	120.786	209.606	183.069	49.8319	112.511
ENSG00000081041	CXCL2	1.08101	11.6485	19.7558	30.5992	14.5182	28.3096	31.1449	41.2884
ENSG00000081051	AFP	3.24304	0	0.705564	0	0	0	0	0
ENSG00000081052	COL4A4	0	0	0	0.805242	0	0	0	0
ENSG00000081059	TCF7	117.83	93.1883	71.262	92.6028	62.6096	49.07	91.8775	24.773
ENSG00000081087	OSTM1	42.1595	56.9484	76.9065	28.1835	43.5545	36.8025	179.862	57.8037
ENSG00000081138	CDH7	0	6.47141	0.705564	0	0	0	0	0
ENSG00000081148	IMPG2	0	0	0	0	0	0	0	0
ENSG00000081154	PCNP	197.825	328.747	150.991	257.677	281.289	310.462	161.175	333.403
ENSG00000081177	EXD2	20.5392	38.8284	19.0502	30.5992	13.6108	22.6477	10.1221	11.3543
ENSG00000081181	ARG2	20.5392	7.76569	68.4397	8.85766	39.925	42.4644	235.923	15.4831
ENSG00000081189	MEF2C	0	14.2371	7.05564	7.24718	1.81477	18.8731	6.22899	14.4509
ENSG00000081237	PTPRC	5.40506	0	0	0	17.2403	3.77461	0	0
ENSG00000081248	CACNA1S	0	0	0	0	0	0	0	0
ENSG00000081277	PKP1	22.7013	172.139	40.2172	24.1573	4.53693	20.7604	19.4656	117.672
ENSG00000081307	UBA5	88.643	165.668	77.6121	103.876	56.2579	147.21	54.5036	118.704
ENSG00000081320	STK17B	123.235	73.774	40.2172	120.786	115.238	201.942	76.3051	124.897
ENSG00000081377	CDC14B	127.559	113.897	106.54	40.2621	205.976	88.7034	216.457	133.155
ENSG00000081386	ZNF510	32.4304	23.2971	15.5224	12.8839	25.4068	31.1405	14.7938	33.0307
ENSG00000081479	LRP2	0	5.17713	0	0	0	0	0	0
ENSG00000081665	ZNF506	36.7544	126.84	73.3787	16.9101	20.8699	14.1548	75.5265	80.5123
ENSG00000081692	JMJD4	76.7519	53.0655	159.458	45.8988	130.663	32.0842	119.129	51.6104
ENSG00000081721	DUSP12	57.2937	27.1799	87.49	58.7827	65.3317	67.943	85.6486	24.773
ENSG00000081760	AACS	221.608	38.8284	88.1955	151.385	123.404	75.4922	125.358	108.382
ENSG00000081791	DELE1	110.263	63.4198	82.551	42.6778	68.0539	32.0842	61.5112	40.2561
ENSG00000081800	SLC13A1	0	0	0	0	0	0	0	0
ENSG00000081803	CADPS2	2.16203	47.8884	20.4614	0	9.07385	1.88731	72.412	61.9325
ENSG00000081818	PCDHB4	0	2.58856	0	0	1.81477	0	0	0
ENSG00000081842	PCDHA6	0	5.17713	0	0	0	0	0	2.06442
ENSG00000081853	PCDHGA2	0	0	0	1.61048	0	0	0	0
ENSG00000081870	HSPB11	155.666	54.3598	43.0394	127.228	69.8687	90.5907	29.5877	56.7715
ENSG00000081913	PHLPP1	116.749	41.417	58.5618	71.6665	43.5545	49.07	44.3815	42.3206
ENSG00000081923	ATP8B1	141.613	164.374	166.513	161.854	157.885	141.548	137.816	155.864
ENSG00000081985	IL12RB2	3.24304	0	0	0	9.98124	0	0	13.4187
ENSG00000082014	SMARCD3	0	0	4.23339	0.805242	4.53693	0	0	0
ENSG00000082068	WDR70	145.937	201.908	40.9227	188.427	109.794	199.111	30.3663	67.0936
ENSG00000082074	FYB1	2.16203	81.5397	0	0	4.53693	4.71826	2.33587	44.385
ENSG00000082126	MPP4	0	0	0	0	0	0	0	0
ENSG00000082146	STRADB	32.4304	19.4142	23.9892	15.2996	54.4431	34.9152	20.2442	30.9663
ENSG00000082153	BZW1	527.534	546.187	570.801	454.962	773.092	450.122	876.73	859.83
ENSG00000082175	PGR	0	0	0	0	0	0	0	0
ENSG00000082196	C1QTNF3	0	3.88284	0	1.61048	0.907385	3.77461	1.55725	0
ENSG00000082212	ME2	94.0481	28.4742	77.6121	117.565	103.442	154.759	114.458	66.0614
ENSG00000082213	C5orf22	44.3215	16.8257	28.9281	132.06	92.5533	175.519	41.267	62.9647
ENSG00000082258	CCNT2	112.425	181.199	110.774	103.071	125.219	121.731	151.053	195.087
ENSG00000082269	FAM135A	51.8886	231.676	57.1507	60.3931	140.645	86.8161	104.336	244.634
ENSG00000082293	COL19A1	0	0	0	0	0	0	0	0
ENSG00000082397	EPB41L3	0	0	0	0	2.72216	0	0	0
ENSG00000082438	COBLL1	28.1063	102.248	208.141	136.891	58.0727	233.082	336.365	226.054
ENSG00000082458	DLG3	212.959	487.944	339.376	290.692	541.709	372.743	654.043	595.585
ENSG00000082482	KCNK2	0	0	0	0	0	0	0	0
ENSG00000082497	SERTAD4	4.32405	0	0	0.805242	0	0	0	0
ENSG00000082512	TRAF5	268.091	186.377	201.086	171.517	76.2204	91.5343	97.3279	35.0951
ENSG00000082515	MRPL22	115.668	62.1255	91.0178	128.839	159.7	204.773	90.3203	81.5445
ENSG00000082516	GEMIN5	118.911	76.3626	92.4289	88.5766	64.4244	50.0136	59.954	61.9325
ENSG00000082556	OPRK1	0	0	0	0	0	0	0	0
ENSG00000082641	NFE2L1	147.018	134.605	430.394	262.509	361.139	531.277	910.211	353.015
ENSG00000082684	SEMA5B	0	0	0	0	0	0	0	0
ENSG00000082701	GSK3B	284.306	292.508	296.337	252.041	330.288	246.293	296.655	311.727
ENSG00000082781	ITGB5	283.225	97.0711	309.037	487.171	411.046	490.7	334.029	183.733
ENSG00000082805	ERC1	279.982	581.132	122.063	66.8351	306.696	39.6334	175.969	666.807
ENSG00000082898	XPO1	260.524	236.853	228.603	342.228	313.955	359.532	352.716	263.213
ENSG00000082996	RNF13	97.2911	139.782	103.012	287.471	89.8311	236.857	109.007	166.186
ENSG00000083067	TRPM3	3.24304	1.29428	0	0	0	0	0	0
ENSG00000083093	PALB2	42.1595	40.1227	52.9173	74.0823	68.9613	40.5771	26.4732	37.1595
ENSG00000083097	DOP1A	21.6203	91.894	93.1345	29.7939	42.6471	33.0279	109.786	133.155
ENSG00000083099	LYRM2	184.853	622.549	444.505	149.775	139.737	86.8161	343.373	364.37
ENSG00000083123	BCKDHB	17.2962	60.8312	16.228	9.6629	8.16647	4.71826	4.67174	11.3543
ENSG00000083168	KAT6A	618.339	792.1	963.095	764.98	749.5	1220.14	927.34	1183.94
ENSG00000083223	TUT7	695.091	420.641	400.76	301.966	626.096	410.489	555.158	326.178
ENSG00000083290	ULK2	21.6203	5.17713	20.4614	12.8839	28.1289	9.43653	14.7938	9.28988
ENSG00000083307	GRHL2	82.157	139.782	76.9065	109.513	98.905	214.209	91.0989	204.377
ENSG00000083312	TNPO1	1031.29	604.429	1030.12	648.22	1412.8	875.71	1208.42	1060.08
ENSG00000083444	PLOD1	84.319	29.7685	195.441	111.123	68.9613	114.182	110.564	24.773
ENSG00000083454	P2RX5	39.9975	1.29428	17.6391	37.0411	89.8311	34.9152	24.1373	3.09663
ENSG00000083457	ITGAE	42.1595	41.417	35.9838	37.8464	37.2028	64.1684	8.56486	35.0951
ENSG00000083520	DIS3	330.79	519.007	168.63	293.108	362.954	306.687	208.671	541.91
ENSG00000083535	PIBF1	139.451	472.413	74.0842	103.876	107.979	101.915	105.893	328.242
ENSG00000083544	TDRD3	88.643	220.028	54.3284	55.5617	47.184	51.9009	48.2746	91.8666
ENSG00000083635	NUFIP1	244.309	358.516	122.063	260.898	139.737	160.421	70.8547	203.345
ENSG00000083642	PDS5B	229.175	978.477	134.057	413.894	133.386	350.095	87.9844	492.364
ENSG00000083720	OXCT1	0	45.2998	0.705564	18.5206	0.907385	28.3096	0	40.2561
ENSG00000083750	RRAGB	10.8101	33.6513	21.1669	13.6891	7.25908	0.943653	14.7938	8.25767
ENSG00000083782	EPYC	0	0	0	0	0	0	0	0
ENSG00000083799	CYLD	35.6734	113.897	189.797	53.9512	288.549	115.126	647.815	360.241
ENSG00000083807	SLC27A5	57.2937	5.17713	9.8779	94.2133	37.2028	36.8025	1.55725	7.22546
ENSG00000083812	ZNF324	19.4582	42.7113	50.8006	5.63669	25.4068	12.2675	27.2518	16.5153
ENSG00000083814	ZNF671	0	0	0	0	0	0	0	0
ENSG00000083817	ZNF416	2.16203	1.29428	11.9946	1.61048	13.6108	2.83096	19.4656	2.06442
ENSG00000083828	ZNF586	5.40506	15.5314	11.289	8.85766	19.0551	5.66192	11.6793	3.09663
ENSG00000083838	ZNF446	23.7823	16.8257	52.9173	1.61048	27.2216	2.83096	98.1065	24.773
ENSG00000083844	ZNF264	29.1873	56.9484	125.59	101.46	32.6659	88.7034	145.603	94.9632
ENSG00000083845	RPS5	3007.38	2169.22	3156.69	2698.37	3243.9	2354.41	2424.63	2487.62
ENSG00000083857	FAT1	1044.26	242.031	1720.17	169.101	1302.1	131.168	1259.03	304.502
ENSG00000083896	YTHDC1	428.081	405.11	565.863	306.797	421.934	415.207	514.67	365.402
ENSG00000083937	CHMP2B	446.458	403.816	553.868	804.437	887.423	938.935	841.692	933.117
ENSG00000084070	SMAP2	62.6987	53.0655	28.9281	54.7564	45.3693	80.2105	45.1601	92.8988
ENSG00000084072	PPIE	151.342	107.425	69.8509	152.191	110.701	215.153	59.954	131.091
ENSG00000084073	ZMPSTE24	166.476	240.736	127.002	162.659	139.737	136.83	85.6486	261.149
ENSG00000084090	STARD7	566.451	414.17	768.359	458.183	460.044	445.404	443.815	669.904
ENSG00000084092	NOA1	129.722	63.4198	73.3787	206.947	64.4244	106.633	49.8319	46.4494
ENSG00000084093	REST	501.59	570.778	567.979	527.433	657.854	456.728	745.921	353.015
ENSG00000084110	HAL	0	0	0	0	0	0	0	0
ENSG00000084112	SSH1	168.638	56.9484	121.357	54.7564	194.18	78.3232	135.48	84.6411
ENSG00000084207	GSTP1	6625.53	1365.47	3333.79	3404.56	3618.65	2079.81	1885.05	851.572
ENSG00000084234	APLP2	1568.55	626.432	2961.25	1587.13	1497.19	1495.69	4227.15	914.537
ENSG00000084444	FAM234B	4.32405	6.47141	3.52782	13.6891	0	16.0421	0	10.3221
ENSG00000084453	SLCO1A2	5.40506	414.17	0	0.805242	8.16647	0.943653	4.67174	151.735
ENSG00000084463	WBP11	496.185	1366.76	719.676	451.741	600.689	484.094	656.379	1486.38
ENSG00000084623	EIF3I	616.177	653.612	246.242	433.22	694.15	350.095	222.686	483.074
ENSG00000084628	NKAIN1	0	0	0	0	0	0	0	0
ENSG00000084636	COL16A1	36.7544	72.4798	7.05564	2.41573	5.44431	7.54922	38.9312	41.2884
ENSG00000084652	TXLNA	207.554	209.674	92.4289	110.318	196.903	131.168	120.687	162.057
ENSG00000084674	APOB	0	0	0	0	0	0	0	0
ENSG00000084676	NCOA1	45.4025	69.8912	124.885	71.6665	83.4795	97.1963	99.6638	89.8022
ENSG00000084693	AGBL5	38.9165	47.8884	50.0951	53.9512	29.0363	27.3659	18.687	19.612
ENSG00000084710	EFR3B	3.24304	0	0.705564	0	7.25908	0	0	0
ENSG00000084731	KIF3C	27.0253	25.8856	18.3447	35.4306	9.98124	22.6477	6.22899	3.09663
ENSG00000084733	RAB10	1044.26	564.307	673.814	796.384	1485.39	989.892	891.524	975.437
ENSG00000084734	GCKR	0	0	0	0	2.72216	0	0	0
ENSG00000084754	HADHA	698.334	487.944	524.94	715.86	493.618	528.446	452.38	348.887
ENSG00000084764	MAPRE3	101.615	16.8257	33.1615	96.629	100.72	68.8867	27.2518	18.5798
ENSG00000084774	CAD	315.656	93.1883	103.718	192.453	144.274	138.717	10.9007	98.0598
ENSG00000085063	CD59	542.668	229.088	586.324	194.869	762.204	193.449	674.288	216.764
ENSG00000085117	CD82	524.291	130.722	541.168	48.3145	709.575	140.604	812.104	208.506
ENSG00000085185	BCORL1	72.4278	75.0683	23.9892	56.3669	88.0164	31.1405	62.2899	35.0951
ENSG00000085224	ATRX	973.992	768.803	1699.7	1006.55	1048.03	955.92	2098.39	680.226
ENSG00000085231	AK6	41.0785	47.8884	52.9173	80.5242	40.8323	74.5486	22.5801	72.2546
ENSG00000085265	FCN1	0	0	0	0	0	0	0	0
ENSG00000085274	MYNN	29.1873	54.3598	33.8671	62.8089	13.6108	74.5486	20.2442	46.4494
ENSG00000085276	MECOM	145.937	222.616	299.865	72.4718	168.774	38.6898	274.854	202.313
ENSG00000085365	SCAMP1	148.099	133.311	95.2512	334.175	93.4607	174.576	111.343	106.318
ENSG00000085377	PREP	98.3721	117.78	139.702	227.078	124.312	91.5343	105.893	161.025
ENSG00000085382	HACE1	4.32405	19.4142	4.93895	6.44193	0.907385	0.943653	0.778623	5.16104
ENSG00000085415	SEH1L	44.3215	128.134	25.4003	67.6403	32.6659	44.3517	18.687	81.5445
ENSG00000085433	WDR47	2.16203	44.0056	4.23339	22.5468	5.44431	16.9858	19.4656	29.9341
ENSG00000085449	WDFY1	101.615	99.6597	126.296	182.79	206.884	205.716	344.151	203.345
ENSG00000085465	OVGP1	16.2152	23.2971	7.05564	4.02621	13.6108	12.2675	0	7.22546
ENSG00000085491	SLC25A24	250.795	205.791	107.951	173.932	168.774	154.759	60.7326	247.73
ENSG00000085511	MAP3K4	73.5089	119.074	129.824	152.996	37.2028	137.773	39.7098	89.8022
ENSG00000085514	PILRA	1.08101	2.58856	0	0	2.72216	0	0	3.09663
ENSG00000085552	IGSF9	24.8633	9.05997	67.7342	24.9625	17.2403	17.9294	14.0152	25.8052
ENSG00000085563	ABCB1	205.392	326.159	629.363	37.8464	531.728	60.3938	939.798	778.285
ENSG00000085644	ZNF213	37.8354	6.47141	57.1507	16.9101	56.2579	34.9152	57.6181	39.2239
ENSG00000085662	AKR1B1	347.005	0	0.705564	0	150.626	0.943653	0	0
ENSG00000085719	CPNE3	184.853	350.75	247.653	558.838	204.162	425.587	225.801	242.569
ENSG00000085721	RRN3	101.615	47.8884	149.58	202.921	144.274	228.364	119.129	152.767
ENSG00000085733	CTTN	883.187	288.625	661.114	428.389	708.668	242.519	924.226	365.402
ENSG00000085741	WNT11	11.8911	0	2.82226	40.2621	10.8886	13.2111	4.67174	0
ENSG00000085760	MTIF2	414.028	326.159	299.865	318.071	525.376	386.898	275.633	334.436
ENSG00000085788	DDHD2	54.0506	129.428	38.1005	64.4193	39.925	41.5207	16.3511	60.9003
ENSG00000085831	TTC39A	51.8886	119.074	42.3339	36.2359	90.7385	57.5628	56.0609	119.736
ENSG00000085832	EPS15	140.532	256.268	78.3176	74.8875	139.737	105.689	117.572	204.377
ENSG00000085840	ORC1	8.6481	67.3026	4.23339	45.8988	6.3517	22.6477	1.55725	5.16104
ENSG00000085871	MGST2	512.4	234.265	375.36	300.355	323.937	137.773	352.716	215.732
ENSG00000085872	CHERP	222.689	399.933	233.542	157.022	139.737	129.28	175.969	505.782
ENSG00000085978	ATG16L1	128.64	53.0655	90.3122	105.487	174.218	100.971	141.709	87.7378
ENSG00000085982	USP40	357.815	317.099	306.92	130.449	358.417	154.759	203.999	333.403
ENSG00000085998	POMGNT1	36.7544	44.0056	13.4057	47.5093	27.2216	37.7461	9.34348	25.8052
ENSG00000085999	RAD54L	36.7544	20.7085	2.82226	28.9887	4.53693	6.60557	1.55725	12.3865
ENSG00000086015	MAST2	49.7266	85.4226	59.973	102.266	107.979	96.2526	61.5112	85.6733
ENSG00000086061	DNAJA1	448.62	608.312	337.965	541.123	1270.34	843.626	913.325	1686.63
ENSG00000086062	B4GALT1	1055.07	332.63	618.78	602.321	1873.75	1060.67	1177.28	1108.59
ENSG00000086065	CHMP5	539.425	226.499	275.17	457.377	768.555	768.133	420.457	508.879
ENSG00000086102	NFX1	229.175	415.464	182.741	161.048	226.846	129.28	204.778	489.267
ENSG00000086159	AQP6	4.32405	0	7.05564	2.41573	0	0	0	0
ENSG00000086189	DIMT1	125.397	81.5397	83.2566	107.097	76.2204	120.788	65.4043	50.5782
ENSG00000086200	IPO11	31.3494	50.477	26.8114	39.4569	17.2403	27.3659	36.5953	36.1273
ENSG00000086205	FOLH1	0	0	0	0	0	0	0	0
ENSG00000086232	EIF2AK1	906.97	736.446	1461.93	1140.22	891.96	1106.9	1297.19	731.836
ENSG00000086288	NME8	0	0	0	0	0	0	0	0
ENSG00000086289	EPDR1	183.772	7.76569	82.551	202.921	96.1828	180.238	122.244	7.22546
ENSG00000086300	SNX10	15.1342	22.0028	28.9281	33.8202	15.4256	84.9288	22.5801	12.3865
ENSG00000086475	SEPHS1	118.911	164.374	143.935	227.078	112.516	233.082	111.343	208.506
ENSG00000086504	MRPL28	24.8633	50.477	31.0448	53.146	41.7397	79.2668	40.4884	48.5138
ENSG00000086506	HBQ1	0	0	0	0	0	0	0	0
ENSG00000086544	ITPKC	84.319	49.1827	80.4343	25.7677	300.345	132.111	284.197	190.959
ENSG00000086548	CEACAM6	714.549	51.7713	3450.91	5902.42	4646.72	5692.11	10989.5	407.723
ENSG00000086570	FAT2	0	0	0	0	0	0	0	0
ENSG00000086589	RBM22	276.739	318.393	381.71	281.835	483.636	508.629	541.143	596.617
ENSG00000086598	TMED2	234.58	425.819	226.486	376.853	227.754	356.701	366.732	222.957
ENSG00000086619	ERO1B	3.24304	46.5941	49.3895	18.5206	9.07385	13.2111	133.145	48.5138
ENSG00000086666	ZFAND6	192.42	244.619	385.944	364.775	391.99	327.448	657.937	228.118
ENSG00000086696	HSD17B2	3.24304	20.7085	7.05564	4.83145	14.5182	29.2532	21.0228	65.0292
ENSG00000086712	TXLNG	165.395	111.308	335.849	202.116	67.1465	130.224	194.656	119.736
ENSG00000086717	PPEF1	0	0	0	0	0	0	0	0
ENSG00000086730	LAT2	1.08101	1.29428	16.9335	9.6629	11.796	61.3374	32.7022	21.6764
ENSG00000086758	HUWE1	546.992	723.503	1029.42	649.83	754.945	571.854	1364.15	792.736
ENSG00000086827	ZW10	64.8608	32.357	75.4954	41.0673	55.3505	22.6477	53.725	40.2561
ENSG00000086848	ALG9	33.5114	6.47141	26.8114	3.22097	23.592	15.0984	15.5725	19.612
ENSG00000086967	MYBPC2	0	0	0.705564	0	0	0	0	0
ENSG00000086991	NOX4	0	0	0	0	0.907385	0	0	2.06442
ENSG00000087008	ACOX3	85.4	6.47141	70.5564	46.704	70.7761	22.6477	95.7707	25.8052
ENSG00000087053	MTMR2	61.6177	75.0683	47.9784	52.3407	32.6659	44.3517	30.3663	28.9018
ENSG00000087074	PPP1R15A	512.4	143.665	1117.61	230.299	869.275	604.882	1629.66	733.901
ENSG00000087076	HSD17B14	0	0	6.35008	2.41573	0	0	3.11449	0
ENSG00000087077	TRIP6	4.32405	97.0711	160.163	66.0298	4.53693	74.5486	109.007	292.115
ENSG00000087085	ACHE	3.24304	7.76569	1.41113	0	4.53693	6.60557	47.496	24.773
ENSG00000087086	FTL	2192.29	1665.74	13796.6	2418.95	2679.51	1678.76	10921.7	2192.41
ENSG00000087087	SRRT	301.602	406.404	297.043	167.49	218.68	213.266	356.609	393.272
ENSG00000087088	BAX	83.238	11.6485	43.745	14.4944	30.8511	9.43653	19.4656	17.5476
ENSG00000087095	NLK	37.8354	50.477	44.4505	25.7677	37.2028	17.9294	57.6181	60.9003
ENSG00000087111	PIGS	122.154	69.8912	123.474	82.1347	47.184	84.9288	65.4043	47.4816
ENSG00000087116	ADAMTS2	0	0	0	0	0.907385	0	0	0
ENSG00000087128	TMPRSS11E	1.08101	0	0	0	0	1.88731	0	0
ENSG00000087152	ATXN7L3	140.532	110.014	299.865	194.063	142.459	242.519	407.22	169.282
ENSG00000087157	PGS1	43.2405	15.5314	31.7504	28.9887	19.9625	33.0279	48.2746	27.8696
ENSG00000087191	PSMC5	97.2911	216.145	179.213	235.936	70.7761	194.393	144.045	232.247
ENSG00000087206	UIMC1	206.473	190.259	157.341	175.543	243.179	199.111	153.389	198.184
ENSG00000087237	CETP	0	0	3.52782	0	0	0.943653	0	0
ENSG00000087245	MMP2	0	6.47141	2.82226	0	0	0	0	0
ENSG00000087250	MT3	0	0	0	4.02621	0	0	0	0
ENSG00000087253	LPCAT2	175.124	142.371	264.587	273.782	106.164	146.266	38.1525	39.2239
ENSG00000087258	GNAO1	0	0	0	0	0	0	0	0
ENSG00000087263	OGFOD1	338.357	328.747	747.193	191.648	438.267	263.279	773.951	494.428
ENSG00000087266	SH3BP2	62.6987	104.837	98.0734	63.6141	114.331	117.957	115.236	245.666
ENSG00000087269	NOP14	337.276	342.985	496.717	327.733	178.755	255.73	320.793	321.017
ENSG00000087274	ADD1	181.61	230.382	158.046	289.887	167.866	242.519	172.854	231.215
ENSG00000087299	L2HGDH	83.238	115.191	45.1561	44.2883	68.9613	42.4644	18.687	72.2546
ENSG00000087301	TXNDC16	14.0532	71.1855	33.1615	19.3258	6.3517	13.2111	24.1373	22.7086
ENSG00000087302	RTRAF	322.142	327.453	242.714	487.171	410.138	340.659	232.808	451.075
ENSG00000087303	NID2	0	0	1.41113	0	0	0	0.778623	0
ENSG00000087338	GMCL1	137.289	176.022	154.519	183.595	61.7022	167.027	105.893	104.253
ENSG00000087365	SF3B2	822.651	959.062	1447.82	963.069	1001.75	998.385	2187.93	1417.22
ENSG00000087448	KLHL42	255.119	425.819	209.553	193.258	262.234	137.773	269.404	310.695
ENSG00000087460	GNAS	381.597	1392.65	930.639	1608.87	432.823	1299.41	986.516	751.448
ENSG00000087470	DNM1L	313.494	437.467	256.12	135.281	371.121	168.914	290.426	486.17
ENSG00000087494	PTHLH	0	0	0	8.85766	1.81477	5.66192	0	0
ENSG00000087495	PHACTR3	68.1038	0	84.6677	133.67	40.8323	80.2105	18.687	5.16104
ENSG00000087502	ERGIC2	262.686	557.835	162.985	277.808	227.754	206.66	198.549	438.689
ENSG00000087510	TFAP2C	138.37	10.3543	201.086	33.8202	149.719	24.535	347.266	16.5153
ENSG00000087586	AURKA	325.385	276.976	614.546	475.898	294.9	551.093	358.945	181.669
ENSG00000087589	CASS4	0	0	7.76121	0	0	0	3.89312	0
ENSG00000087842	PIR	47.5646	31.0628	35.2782	235.936	28.1289	94.3653	18.687	18.5798
ENSG00000087884	AAMDC	14.0532	33.6513	74.7898	66.0298	17.2403	36.8025	112.9	33.0307
ENSG00000087903	RFX2	37.8354	53.0655	7.76121	31.4044	21.7772	18.8731	17.9083	4.12884
ENSG00000087995	METTL2A	74.5899	76.3626	75.4954	71.6665	48.9988	62.2811	49.0533	62.9647
ENSG00000088002	SULT2B1	44.3215	24.5913	40.2172	44.2883	53.5357	116.069	103.557	50.5782
ENSG00000088035	ALG6	18.3772	59.5369	8.46677	18.5206	1.81477	15.0984	8.56486	29.9341
ENSG00000088038	CNOT3	27.0253	23.2971	40.2172	36.2359	32.6659	43.408	45.1601	65.0292
ENSG00000088053	GP6	0	0	4.23339	0	0	0	5.45036	0
ENSG00000088179	PTPN4	97.2911	125.545	78.3176	74.8875	82.5721	55.6755	69.2975	101.156
ENSG00000088205	DDX18	655.094	1060.02	816.338	686.066	561.672	601.107	625.234	810.284
ENSG00000088247	KHSRP	2609.56	2039.79	2334.71	1364.88	2359.2	1665.55	1669.37	2294.6
ENSG00000088256	GNA11	489.699	467.236	685.808	303.576	816.647	407.658	676.624	610.035
ENSG00000088280	ASAP3	1.08101	9.05997	2.11669	0.805242	9.98124	7.54922	0.778623	12.3865
ENSG00000088298	EDEM2	54.0506	29.7685	59.973	64.4193	66.2391	82.0978	58.3967	36.1273
ENSG00000088305	DNMT3B	15.1342	3.88284	16.9335	13.6891	16.3329	33.9715	19.4656	11.3543
ENSG00000088320	REM1	0	0	0	0	0	0	0	0
ENSG00000088325	TPX2	817.245	706.678	677.342	1193.37	530.82	1198.44	324.686	444.882
ENSG00000088356	PDRG1	141.613	75.0683	260.353	139.307	252.253	244.406	338.701	166.186
ENSG00000088367	EPB41L1	670.228	146.254	556.69	262.509	851.127	287.814	304.442	174.443
ENSG00000088386	SLC15A1	39.9975	19.4142	57.8563	10.4681	96.1828	24.535	33.4808	29.9341
ENSG00000088387	DOCK9	105.939	113.897	33.1615	88.5766	97.0902	106.633	59.1754	111.479
ENSG00000088448	ANKRD10	323.223	358.516	69.8509	226.273	270.401	252.899	87.2058	348.887
ENSG00000088451	TGDS	39.9975	98.3654	14.8168	69.2508	28.1289	50.9573	7.00761	74.319
ENSG00000088538	DOCK3	3.24304	2.58856	2.82226	0	3.62954	0	0	2.06442
ENSG00000088543	C3orf18	2.16203	0	0.705564	3.22097	0.907385	0	3.89312	0
ENSG00000088682	COQ9	90.8051	59.5369	124.885	46.704	134.293	37.7461	151.053	103.221
ENSG00000088726	TMEM40	11.8911	0	4.23339	0	91.6459	0	22.5801	2.06442
ENSG00000088727	KIF9	103.777	112.602	142.524	47.5093	42.6471	14.1548	58.3967	49.546
ENSG00000088756	ARHGAP28	3.24304	0	0	0	0	2.83096	0	0
ENSG00000088766	CRLS1	165.395	196.731	76.9065	198.895	143.367	168.914	54.5036	143.477
ENSG00000088782	DEFB127	0	0	0	0	0	0	0	0
ENSG00000088808	PPP1R13B	21.6203	49.1827	37.3949	32.2097	36.2954	24.535	38.1525	39.2239
ENSG00000088812	ATRN	64.8608	20.7085	47.2728	47.5093	97.0902	38.6898	51.3891	20.6442
ENSG00000088826	SMOX	82.157	51.7713	88.1955	75.6927	414.675	185.9	185.312	266.31
ENSG00000088827	SIGLEC1	0	0	0	0	0	0.943653	0	2.06442
ENSG00000088832	FKBP1A	1524.23	921.528	632.891	1278.72	1628.76	1218.26	626.013	930.02
ENSG00000088833	NSFL1C	361.058	297.685	184.858	382.49	456.415	534.108	193.877	223.989
ENSG00000088836	SLC4A11	51.8886	63.4198	17.6391	52.3407	39.925	46.239	1.55725	71.2224
ENSG00000088854	C20orf194	1.08101	2.58856	0	0.805242	0	0	0	8.25767
ENSG00000088876	ZNF343	30.2684	20.7085	21.1669	36.2359	32.6659	22.6477	18.687	44.385
ENSG00000088881	EBF4	1.08101	0	1.41113	0	10.8886	1.88731	3.89312	0
ENSG00000088882	CPXM1	0	0	0	0	0	0	0	0
ENSG00000088888	MAVS	737.251	627.726	323.148	374.437	919.181	255.73	300.549	662.678
ENSG00000088899	LZTS3	292.954	95.7768	122.768	223.857	336.64	183.069	151.832	50.5782
ENSG00000088926	F11	0	0	0	0	0	0	0	0
ENSG00000088930	XRN2	754.547	432.29	440.272	698.145	487.266	537.882	485.861	361.273
ENSG00000088970	KIZ	137.289	115.191	47.2728	66.8351	91.6459	43.408	47.496	48.5138
ENSG00000088986	DYNLL1	901.564	786.923	935.578	901.066	1505.35	1082.37	956.149	1020.85
ENSG00000088992	TESC	74.5899	155.314	181.33	397.789	30.8511	218.927	84.0913	36.1273
ENSG00000089006	SNX5	973.992	771.392	473.434	959.848	888.33	799.274	290.426	588.359
ENSG00000089009	RPL6	2957.65	2927.66	1664.43	3679.15	2874.6	2674.31	1329.11	2180.03
ENSG00000089012	SIRPG	0	0	0	0	0	0	0	0
ENSG00000089022	MAPKAPK5	151.342	134.605	168.63	186.816	165.144	276.49	134.702	157.928
ENSG00000089041	P2RX7	2.16203	0	1.41113	3.22097	0.907385	0	3.11449	0
ENSG00000089048	ESF1	563.208	572.072	325.971	682.845	388.361	598.276	271.739	425.27
ENSG00000089050	RBBP9	48.6456	66.0083	19.7558	66.8351	25.4068	33.9715	18.687	49.546
ENSG00000089053	ANAPC5	276.739	476.296	493.189	423.557	144.274	331.222	209.45	220.893
ENSG00000089057	SLC23A2	69.1848	28.4742	18.3447	99.85	60.7948	118.9	23.3587	25.8052
ENSG00000089060	SLC8B1	67.0228	6.47141	47.9784	34.6254	84.3868	38.6898	22.5801	11.3543
ENSG00000089063	TMEM230	307.008	244.619	148.874	421.141	232.291	404.827	123.801	236.376
ENSG00000089091	DZANK1	3.24304	20.7085	7.76121	15.2996	9.07385	5.66192	14.7938	5.16104
ENSG00000089094	KDM2B	73.5089	84.1283	71.262	46.704	88.9238	54.7319	66.183	47.4816
ENSG00000089101	CFAP61	0	0	0	0	0	0	0	0
ENSG00000089116	LHX5	8.6481	0	0	0	6.3517	0	0	0
ENSG00000089123	TASP1	43.2405	53.0655	40.9227	54.7564	29.0363	24.535	39.7098	63.9969
ENSG00000089127	OAS1	269.172	164.374	397.938	300.355	771.278	1621.2	1424.88	536.749
ENSG00000089154	GCN1	198.906	178.611	166.513	316.46	222.309	233.082	157.282	221.925
ENSG00000089157	RPLP0	8369.2	4698.24	5259.28	6512.8	8576.61	4193.59	4027.82	5453.16
ENSG00000089159	PXN	666.985	317.099	397.938	788.332	575.282	579.403	303.663	212.635
ENSG00000089163	SIRT4	1.08101	0	2.82226	4.83145	0	0.943653	0	0
ENSG00000089169	RPH3A	0	0	1.41113	4.83145	0	0	0	0
ENSG00000089177	KIF16B	322.142	266.622	200.38	305.187	467.303	447.291	372.182	273.535
ENSG00000089195	TRMT6	303.765	157.902	243.42	294.719	250.438	314.236	168.961	246.698
ENSG00000089199	CHGB	1.08101	1.29428	6.35008	0	4.53693	0	13.2366	4.12884
ENSG00000089220	PEBP1	979.397	1039.31	980.029	782.695	418.305	270.828	667.28	533.652
ENSG00000089225	TBX5	0	0	0	0	0	0	0	0
ENSG00000089234	BRAP	92.9671	46.5941	70.5564	83.7452	88.9238	119.844	116.793	89.8022
ENSG00000089248	ERP29	583.747	310.628	402.877	682.845	744.056	585.065	678.181	605.907
ENSG00000089250	NOS1	0	0	0	0	0	0	0	0
ENSG00000089280	FUS	1386.94	922.823	1279.19	978.369	1222.25	918.174	1103.31	946.536
ENSG00000089289	IGBP1	444.296	552.658	484.017	409.063	244.087	148.154	382.304	226.054
ENSG00000089327	FXYD5	109.182	27.1799	143.23	117.565	108.886	138.717	145.603	22.7086
ENSG00000089335	ZNF302	39.9975	50.477	64.2063	12.8839	48.0914	22.6477	53.725	44.385
ENSG00000089351	GRAMD1A	69.1848	19.4142	240.597	86.1609	115.238	112.295	153.389	23.7408
ENSG00000089356	FXYD3	574.018	556.541	824.805	172.322	641.521	125.506	830.791	735.965
ENSG00000089472	HEPH	165.395	253.679	323.854	81.3294	154.256	37.7461	334.808	328.242
ENSG00000089486	CDIP1	20.5392	44.0056	26.8114	8.05242	12.7034	12.2675	29.5877	48.5138
ENSG00000089505	CMTM1	0	0	0	0	0	0	0	0
ENSG00000089558	KCNH4	0	0	1.41113	0	0	0	0	0
ENSG00000089597	GANAB	858.324	368.87	993.434	590.242	655.132	753.035	691.417	549.135
ENSG00000089639	GMIP	79.9949	116.485	146.052	28.9887	110.701	34.9152	137.816	148.638
ENSG00000089682	RBM41	119.992	305.45	218.019	164.269	193.273	227.42	266.289	377.788
ENSG00000089685	BIRC5	308.089	335.219	111.479	340.617	130.663	391.616	49.8319	130.058
ENSG00000089692	LAG3	0	1.29428	0	0	0	0.943653	0	4.12884
ENSG00000089693	MLF2	599.962	825.751	326.676	320.486	767.648	304.8	476.517	830.928
ENSG00000089723	OTUB2	5.40506	50.477	54.3284	94.2133	0	100.971	17.9083	27.8696
ENSG00000089737	DDX24	549.154	689.852	647.002	657.077	566.208	640.74	771.616	591.456
ENSG00000089775	ZBTB25	34.5924	76.3626	26.1059	31.4044	30.8511	48.1263	21.8014	52.6427
ENSG00000089818	NECAP1	32.4304	41.417	14.8168	37.8464	31.7585	41.5207	56.0609	92.8988
ENSG00000089820	ARHGAP4	75.6709	19.4142	287.165	2.41573	56.2579	0.943653	245.266	6.19325
ENSG00000089847	ANKRD24	0	2.58856	3.52782	0	0	0	3.89312	0
ENSG00000089876	DHX32	130.803	100.954	123.474	74.0823	133.386	62.2811	147.16	101.156
ENSG00000089902	RCOR1	182.691	176.022	174.98	333.37	343.899	501.08	270.961	246.698
ENSG00000089916	GPATCH2L	220.527	220.028	177.097	186.011	181.477	195.336	165.847	162.057
ENSG00000090006	LTBP4	22.7013	45.2998	16.9335	45.0935	28.1289	36.8025	8.56486	95.9954
ENSG00000090013	BLVRB	110.263	58.2427	119.946	128.033	109.794	185.9	176.747	60.9003
ENSG00000090020	SLC9A1	78.9139	22.0028	52.9173	46.704	126.127	52.8446	74.7478	92.8988
ENSG00000090054	SPTLC1	65.9418	51.7713	73.3787	74.0823	137.015	80.2105	94.992	51.6104
ENSG00000090060	PAPOLA	603.205	1001.77	785.293	1128.95	835.702	1103.13	974.058	1200.46
ENSG00000090061	CCNK	131.884	306.745	168.63	285.861	222.309	268.941	208.671	244.634
ENSG00000090097	PCBP4	354.572	76.3626	230.72	41.8726	382.009	89.647	396.319	171.347
ENSG00000090104	RGS1	0	0	0	0	0	0	0	0
ENSG00000090238	YPEL3	46.4835	86.7168	56.4451	53.9512	69.8687	45.2953	91.8775	68.1258
ENSG00000090263	MRPS33	304.846	191.554	298.454	225.468	276.753	133.999	219.572	176.508
ENSG00000090266	NDUFB2	420.514	152.725	310.448	381.685	384.731	296.307	250.717	268.374
ENSG00000090273	NUDC	126.478	152.725	68.4397	144.138	58.98	71.7176	51.3891	174.443
ENSG00000090316	MAEA	119.992	103.543	151.696	189.232	69.8687	140.604	140.152	117.672
ENSG00000090339	ICAM1	11.8911	9.05997	1.41113	1.61048	558.949	205.716	255.388	262.181
ENSG00000090372	STRN4	102.696	86.7168	100.19	142.528	169.681	137.773	160.396	165.153
ENSG00000090376	IRAK3	0	34.9456	1.41113	0	0	0	0	58.8359
ENSG00000090382	LYZ	2.16203	94.4825	6.35008	234.325	0	92.478	11.6793	42.3206
ENSG00000090402	SI	0	19.4142	0	0	0	0	0	11.3543
ENSG00000090432	MUL1	111.344	64.7141	129.118	37.0411	70.7761	50.0136	123.022	58.8359
ENSG00000090447	TFAP4	43.2405	77.6569	27.517	43.4831	57.1653	47.1826	7.78623	51.6104
ENSG00000090470	PDCD7	190.258	183.788	242.714	145.749	209.606	139.661	273.297	157.928
ENSG00000090487	SPG21	353.491	124.251	575.74	438.857	370.213	324.617	370.625	169.282
ENSG00000090512	FETUB	0	0	0	0	0	0	0	0
ENSG00000090520	DNAJB11	132.965	433.584	264.587	331.76	190.551	416.151	320.793	536.749
ENSG00000090530	P3H2	6.48608	1.29428	0	25.7677	3.62954	21.704	0	0
ENSG00000090534	THPO	0	0	0	0	12.7034	0	0	4.12884
ENSG00000090539	CHRD	0	0	0	0	244.087	4.71826	8.56486	92.8988
ENSG00000090554	FLT3LG	0	0	0.705564	0	0.907385	0	0	6.19325
ENSG00000090565	RAB11FIP3	24.8633	22.0028	47.9784	14.4944	17.2403	26.4223	26.4732	33.0307
ENSG00000090581	GNPTG	68.1038	76.3626	39.5116	136.891	26.3142	59.4501	45.9388	68.1258
ENSG00000090612	ZNF268	24.8633	28.4742	63.5008	45.0935	29.9437	33.0279	56.0609	25.8052
ENSG00000090615	GOLGA3	269.172	300.273	422.633	238.352	432.823	299.138	410.334	373.66
ENSG00000090621	PABPC4	1862.58	1216.62	396.527	640.167	1673.22	504.854	362.838	1150.91
ENSG00000090659	CD209	0	0	0	0	0	0	0	0
ENSG00000090661	CERS4	1.08101	0	2.11669	4.83145	0	0.943653	0	0
ENSG00000090674	MCOLN1	1.08101	3.88284	12.7002	8.85766	0.907385	4.71826	9.34348	8.25767
ENSG00000090686	USP48	223.77	295.096	208.847	148.165	203.254	181.181	234.366	325.146
ENSG00000090776	EFNB1	380.516	314.51	695.686	347.059	415.582	225.533	861.157	261.149
ENSG00000090857	PDPR	353.491	1053.55	466.378	173.932	209.606	102.858	304.442	876.345
ENSG00000090861	AARS	669.147	763.626	1854.93	404.231	1822.03	969.132	1941.89	1422.38
ENSG00000090863	GLG1	716.711	1129.91	989.201	454.156	913.737	449.179	1054.26	1192.2
ENSG00000090889	KIF4A	183.772	318.393	107.951	158.633	107.071	275.547	36.5953	211.603
ENSG00000090905	TNRC6A	317.818	278.27	278.698	244.794	290.363	217.984	313.785	279.729
ENSG00000090924	PLEKHG2	15.1342	19.4142	53.6229	4.02621	65.3317	45.2953	145.603	14.4509
ENSG00000090932		3.24304	40.1227	3.52782	4.83145	12.7034	3.77461	0	16.5153
ENSG00000090971	NAT14	104.858	45.2998	9.8779	102.266	74.4056	72.6613	26.4732	31.9985
ENSG00000090975	PITPNM2	31.3494	16.8257	16.228	17.7153	42.6471	21.704	13.2366	37.1595
ENSG00000090989	EXOC1	201.068	260.151	256.825	233.52	304.881	309.518	364.396	231.215
ENSG00000091009	RBM27	105.939	73.774	63.5008	115.955	111.608	88.7034	69.2975	99.0921
ENSG00000091010	POU4F3	0	0	0	0	0	0	0	0
ENSG00000091039	OSBPL8	427	308.039	294.22	778.669	417.397	513.347	485.082	217.796
ENSG00000091073	DTX2	291.873	249.796	234.247	227.883	335.733	217.04	328.579	386.046
ENSG00000091106	NLRC4	0	0	0	0	0	0	4.67174	0
ENSG00000091127	PUS7	74.5899	69.8912	49.3895	58.7827	77.1278	68.8867	35.038	67.0936
ENSG00000091128	LAMB4	0	1.29428	0	0	0	0	0	0
ENSG00000091129	NRCAM	153.504	42.7113	0.705564	0	24.4994	0	0	10.3221
ENSG00000091136	LAMB1	468.078	583.721	124.179	86.9661	436.452	65.1121	43.6029	253.923
ENSG00000091137	SLC26A4	0	0	0	4.83145	8.16647	1.88731	127.694	9.28988
ENSG00000091138	SLC26A3	1.08101	7.76569	104.424	0	2.72216	0	52.9464	54.7071
ENSG00000091140	DLD	264.848	223.911	205.319	157.022	240.457	141.548	212.564	279.729
ENSG00000091157	WDR7	9.72911	14.2371	21.1669	12.8839	10.8886	22.6477	15.5725	39.2239
ENSG00000091164	TXNL1	112.425	66.0083	84.6677	111.929	166.052	125.506	121.465	87.7378
ENSG00000091181	IL5RA	0	0	0.705564	0	0	0	0	0
ENSG00000091262	ABCC6	14.0532	1.29428	11.289	5.63669	25.4068	9.43653	26.4732	7.22546
ENSG00000091317	CMTM6	1803.13	1203.68	1450.64	2083.16	907.385	1502.3	1344.68	921.763
ENSG00000091409	ITGA6	779.41	972.005	1664.43	4975.59	1332.04	5826.11	2655.88	1123.04
ENSG00000091428	RAPGEF4	0	27.1799	11.9946	12.0786	0	3.77461	3.11449	12.3865
ENSG00000091436	MAP3K20	372.949	482.767	400.055	582.995	313.048	588.839	478.075	393.272
ENSG00000091482	SMPX	0	1.29428	1.41113	0	0	0	0	0
ENSG00000091483	FH	145.937	69.8912	110.774	125.618	154.256	100.027	114.458	86.7055
ENSG00000091490	SEL1L3	375.111	240.736	467.789	388.127	579.819	562.417	706.99	478.945
ENSG00000091513	TF	0	0	0	2.41573	0	0.943653	0	0
ENSG00000091527	CDV3	905.888	729.975	838.21	991.253	1601.54	1050.29	998.195	1642.24
ENSG00000091536	MYO15A	0	0	0.705564	0	0	0.943653	0	1.03221
ENSG00000091542	ALKBH5	127.559	146.254	206.73	187.621	147.904	206.66	174.412	272.503
ENSG00000091583	APOH	0	0	2.11669	0	0	0	0	0
ENSG00000091592	NLRP1	1.08101	176.022	2.11669	1.61048	6.3517	0	0.778623	164.121
ENSG00000091622	PITPNM3	5.40506	20.7085	1.41113	38.6516	11.796	16.9858	21.8014	22.7086
ENSG00000091640	SPAG7	235.661	169.551	288.576	312.434	314.863	307.631	404.884	237.408
ENSG00000091651	ORC6	78.9139	115.191	86.0788	93.4081	35.388	107.576	36.5953	78.4479
ENSG00000091656	ZFHX4	0	3.88284	0	0	0	0	0	0
ENSG00000091664	SLC17A6	0	0	0	0	0	0	0	0
ENSG00000091704	CPA1	0	0	0	0	0	0	0	0
ENSG00000091732	ZC3HC1	17.2962	6.47141	29.6337	28.9887	20.8699	22.6477	11.6793	11.3543
ENSG00000091831	ESR1	2.16203	10.3543	0	0	0	0	0	0
ENSG00000091844	RGS17	8.6481	0	0	6.44193	11.796	14.1548	0	7.22546
ENSG00000091879	ANGPT2	0	0	0	0	0	0	0	0
ENSG00000091947	TMEM101	103.777	135.9	91.0178	149.775	69.8687	174.576	45.9388	60.9003
ENSG00000091972	CD200	0	7.76569	0	0	0	0	0	0
ENSG00000091986	CCDC80	118.911	2.58856	31.7504	7.24718	46.2767	11.3238	6.22899	0
ENSG00000092009	CMA1	0	0	0	0	0	0	0	0
ENSG00000092010	PSME1	843.19	1110.49	306.215	634.531	2697.66	2824.35	1138.35	2635.23
ENSG00000092020	PPP2R3C	131.884	179.905	250.475	60.3931	136.108	106.633	277.19	213.667
ENSG00000092036	HAUS4	51.8886	44.0056	16.228	34.6254	30.8511	33.9715	3.89312	25.8052
ENSG00000092051	JPH4	0	0	0	0	0	0	0	0
ENSG00000092054	MYH7	0	0	0	0	0	0	2.33587	5.16104
ENSG00000092067	CEBPE	0	0	0	0	0	0	0	0
ENSG00000092068	SLC7A8	98.3721	207.085	10.5835	20.9363	4.53693	11.3238	0.778623	42.3206
ENSG00000092094	OSGEP	31.3494	97.0711	19.0502	42.6778	23.592	42.4644	5.45036	69.158
ENSG00000092096	SLC22A17	0	0	0	1.61048	0	0	0	0
ENSG00000092098	RNF31	0	1.29428	0	0	0	0.943653	0	0
ENSG00000092108	SCFD1	127.559	440.056	133.352	255.262	191.458	387.841	182.976	455.204
ENSG00000092140	G2E3	156.747	225.205	52.9173	194.869	75.313	184.956	66.9616	148.638
ENSG00000092148	HECTD1	454.025	692.441	445.917	727.133	640.614	622.811	563.723	619.325
ENSG00000092199	HNRNPC	1768.54	1638.56	745.781	2145.16	1675.94	2320.44	745.142	1596.83
ENSG00000092200	RPGRIP1	0	2.58856	0.705564	0	0	0	0	0
ENSG00000092201	SUPT16H	931.833	871.051	396.527	1285.17	852.942	1402.27	329.358	1005.37
ENSG00000092203	TOX4	178.367	251.091	126.296	183.595	238.642	265.166	222.686	331.339
ENSG00000092208	GEMIN2	16.2152	38.8284	12.7002	47.5093	9.98124	27.3659	6.22899	14.4509
ENSG00000092295	TGM1	2.16203	1.29428	0.705564	3.22097	0	0	10.9007	5.16104
ENSG00000092330	TINF2	63.7797	16.8257	41.6283	41.8726	68.9613	55.6755	28.8091	56.7715
ENSG00000092345	DAZL	0	0	0	0	0	0	0	0
ENSG00000092377	TBL1Y	0	0	0	0	0	0	0	0
ENSG00000092421	SEMA6A	1.08101	151.431	129.824	101.46	2.72216	60.3938	207.892	175.476
ENSG00000092439	TRPM7	142.694	332.63	293.515	85.3556	98.905	138.717	161.954	176.508
ENSG00000092445	TYRO3	33.5114	36.2399	127.002	72.4718	23.592	48.1263	24.1373	6.19325
ENSG00000092470	WDR76	32.4304	76.3626	14.8168	99.0447	7.25908	70.774	3.11449	22.7086
ENSG00000092529	CAPN3	0	0	2.82226	0	0	2.83096	0	0
ENSG00000092531	SNAP23	71.3468	191.554	158.046	114.344	59.8874	89.647	172.076	150.702
ENSG00000092607	TBX15	0	0	0	3.22097	0	0.943653	1.55725	2.06442
ENSG00000092621	PHGDH	268.091	152.725	148.874	231.91	438.267	280.265	235.144	566.683
ENSG00000092758	COL9A3	1.08101	7.76569	57.8563	10.4681	0.907385	14.1548	35.038	0
ENSG00000092820	EZR	1282.08	2022.96	1480.98	3113.07	1576.13	3213.14	2199.61	2963.47
ENSG00000092841	MYL6	1117.77	1304.64	1368.09	1153.91	841.146	639.797	1392.18	750.416
ENSG00000092847	AGO1	64.8608	59.5369	23.9892	48.3145	33.5733	34.9152	31.9236	90.8344
ENSG00000092850	TEKT2	0	0	0	0	0	0	0	0
ENSG00000092853	CLSPN	78.9139	97.0711	19.7558	147.359	22.6846	105.689	14.7938	40.2561
ENSG00000092871	RFFL	64.8608	100.954	86.7844	47.5093	104.349	67.943	183.755	148.638
ENSG00000092929	UNC13D	195.663	0	30.3393	12.8839	273.123	15.0984	41.267	8.25767
ENSG00000092931	MFSD11	79.9949	68.5969	50.0951	55.5617	76.2204	89.647	59.954	48.5138
ENSG00000092964	DPYSL2	299.44	146.254	136.174	325.318	28.1289	47.1826	59.954	34.0629
ENSG00000092969	TGFB2	0	0	0	12.0786	2.72216	5.66192	0	3.09663
ENSG00000092978	GPATCH2	167.557	124.251	199.675	136.086	117.96	138.717	179.083	105.285
ENSG00000093000	NUP50	239.985	138.488	544.696	236.741	291.271	273.659	647.815	279.729
ENSG00000093009	CDC45	29.1873	19.4142	16.228	57.1722	6.3517	31.1405	5.45036	11.3543
ENSG00000093010	COMT	535.101	190.259	883.366	458.988	232.291	238.744	418.121	191.991
ENSG00000093072	ADA2	15.1342	6.47141	41.6283	0	10.8886	0	17.9083	0
ENSG00000093134	VNN3	0	0	0	0	0	1.88731	11.6793	4.12884
ENSG00000093144	ECHDC1	68.1038	195.436	134.057	118.371	87.109	99.0836	97.3279	167.218
ENSG00000093167	LRRFIP2	72.4278	161.785	95.9567	190.842	129.756	245.35	101.221	121.801
ENSG00000093183	SEC22C	76.7519	81.5397	43.745	57.9774	27.2216	22.6477	58.3967	31.9985
ENSG00000093217	XYLB	10.8101	34.9456	30.3393	33.0149	24.4994	28.3096	14.7938	33.0307
ENSG00000094631	HDAC6	23.7823	28.4742	91.0178	57.9774	24.4994	54.7319	81.7554	56.7715
ENSG00000094661	OR1I1	0	0	0	0	0	0	0	0
ENSG00000094755	GABRP	0	0	0	0	0	0	0	0
ENSG00000094796	KRT31	0	1.29428	0	0	3.62954	0.943653	0	2.06442
ENSG00000094804	CDC6	84.319	78.9512	50.0951	57.1722	65.3317	179.294	77.8623	149.67
ENSG00000094841	UPRT	12.9722	3.88284	26.1059	14.4944	4.53693	8.49288	23.3587	0
ENSG00000094880	CDC23	67.0228	56.9484	64.9119	157.827	67.1465	178.35	56.0609	62.9647
ENSG00000094914	AAAS	99.4532	45.2998	38.806	59.5879	63.517	28.3096	40.4884	57.8037
ENSG00000094916	CBX5	434.567	625.138	599.024	783.5	225.939	581.29	258.503	527.459
ENSG00000094963	FMO2	0	0	0	0	0	0	0	0
[truncated: 17,635 more rows]
